# Supplementary material for: Metabolomics study reveals the alteration of fatty acid oxidation in the hearts of diabetic mice by empagliflozin
Source: Royal Society of Chemistry journal article supplement (doi:10.1039/d2mo00036a), 2022-04-22
Supplement: d2mo00036a1.xlsx [file d2mo00036a1.xlsx]

## Sheet: Sheet1
Supplementary table S1-The relative abundance of annotated metabolites in positive ion mode.
Compound	SuperClass	db/m-1	db/m-2	db/m-3	db/m-4	db/m-5	db/db-1	db/db-2	db/db-3	db/db-4	db/db-5	db/db-6	db/db-Empa-1	db/db-Empa-2	db/db-Empa-3	db/db-Empa-4	db/db-Empa-5	db/db-Empa-6	db/db-Empa-7
D-Alanine	Organic acids and derivatives	0.00224461	0.00268063	0.00271737	0.00304706	0.00303147	0.00244355	0.00230391	0.00253715	0.0025623	0.00216511	0.00227595	0.00266967	0.00259051	0.00217825	0.00240901	0.00227277	0.00256524	0.0025788
Uracil	Organoheterocyclic compounds	8.70829e-05	2.04191e-08	1.98904e-08	8.99472e-06	0.000395173	5.2288e-05	0.000213123	0.000208591	4.51099e-05	6.436e-07	7.6817e-07	0.000426875	9.89633e-05	3.25597e-05	7.01882e-07	1.91191e-08	1.88486e-08	5.04793e-05
Cytosine	Organoheterocyclic compounds	0.000332683	0.000203536	0.00017633	0.000361187	0.00037651	0.000181868	0.000170714	0.000260106	0.000210649	0.000346833	0.000155419	0.000295422	0.000328546	0.000195064	0.000277771	0.000210248	0.000126158	0.000299125
Adenine	Organoheterocyclic compounds	0.00401407	0.000741683	0.000494322	0.00150741	0.00382624	0.00224705	0.00365326	0.0037771	0.00216779	0.0011057	0.00149334	0.00331978	0.00305075	0.0022769	0.000746269	0.0013398	0.000557161	0.00313359
1-Butylamine	Organic nitrogen compounds	0.000728873	0.000750342	0.0002823	0.000337572	0.000315092	0.000892883	0.000302051	0.000346437	0.000341392	0.000811934	0.00032916	0.000330603	0.000356253	0.000617985	0.00129575	0.000342471	0.000296858	0.000315114
1-Pyrroline	Organoheterocyclic compounds	1.88886e-05	1.95752e-05	2.01864e-05	2.40495e-05	3.02814e-05	3.70622e-05	2.7862e-05	1.8695e-05	2.40186e-05	3.07909e-05	3.82687e-05	3.26233e-05	3.34581e-05	2.84711e-05	3.16422e-05	3.40619e-05	2.81342e-05	2.67565e-05
5-Aminopentanoic acid	Organic acids and derivatives	0.0025223	0.00736274	0.00471785	0.00644608	0.00423026	0.00455815	0.00474167	0.00345672	0.00248727	0.00251185	0.00269722	0.00359718	0.00317478	0.00284514	0.00338359	0.00285328	0.0019747	0.00238217
L-Isoleucine	Organic acids and derivatives	0.00100177	0.000642183	0.000519051	0.000357236	0.000471937	0.000495022	0.000548132	0.000671507	0.000648417	0.00041463	0.00044205	0.000529371	0.000576209	0.000470931	0.000744178	0.000705363	0.000929347	0.000489623
Niacinamide	Organoheterocyclic compounds	0.000504044	0.000498601	0.000464235	0.000768289	0.00065753	0.000561292	0.00218766	0.000573435	0.000547091	0.000556278	0.000546548	0.000542433	0.000769255	0.000677688	0.000611962	0.000421936	0.000474747	0.000648255
2-Methylpyridine	Organoheterocyclic compounds	1.74819e-06	5.28176e-06	8.55176e-06	9.64025e-06	1.30578e-05	4.12209e-06	2.56986e-05	1.40104e-05	1.53574e-05	7.21254e-06	4.47922e-06	6.11319e-06	6.4923e-06	8.67144e-06	7.00358e-06	1.09503e-05	6.51673e-06	8.04074e-06
L-Carnitine	Organic nitrogen compounds	0.00136945	0.00201903	0.00248682	0.00122043	0.00162652	0.00109601	0.00116149	0.00151802	0.00139626	0.00120914	0.00155205	0.00333084	0.00140347	0.0015079	0.00171706	0.00132442	0.0015371	0.00137302
Adenosine	Nucleosides, nucleotides, and analogues	0.0126113	0.0118941	0.0153289	0.0340288	0.0565484	0.0316948	0.0601474	0.0637505	0.0282435	0.0190843	0.0363989	0.0367963	0.0595676	0.047398	0.0133518	0.0184781	0.00772799	0.0567712
Dedimethylchlorpromazine	Organoheterocyclic compounds	2.37157e-05	2.37423e-05	1.96329e-05	2.05005e-05	1.68268e-05	4.26064e-07	5.36124e-07	4.21789e-06	7.44268e-06	3.83234e-06	4.56408e-06	1.33324e-05	1.35457e-05	8.62358e-06	1.10339e-05	9.66555e-06	3.40027e-06	1.83023e-05
Cytarabine	Nucleosides, nucleotides, and analogues	0.000325325	0.000167496	0.000311843	0.000281039	0.00022497	0.000287609	0.000128668	0.000175644	0.000217415	0.000340897	0.000308232	0.000196054	0.000172127	0.000311336	0.000370771	0.000166647	0.000327111	0.000272044
Choline	Organic nitrogen compounds	0.000127544	8.01047e-05	7.27313e-05	8.85726e-05	9.85386e-05	8.80747e-05	9.66681e-05	0.000110426	0.000119904	8.20593e-05	9.96056e-05	9.1268e-05	0.000135872	9.52901e-05	0.000113275	0.000106404	0.000114436	9.75066e-05
Hypoxanthine	Organoheterocyclic compounds	0.0255593	0.0154443	0.013213	0.00857499	0.0120962	0.00992788	0.0099918	0.0126809	0.0153838	0.00915614	0.0106202	0.010269	0.01057	0.0112855	0.0165223	0.01728	0.0180009	0.0150321
Creatinine	Organic acids and derivatives	0.00252897	0.000631161	0.000639728	0.00159683	0.002553	0.00114347	0.00209851	0.00224673	0.00217698	0.000903237	0.000794682	0.0019848	0.00157169	0.00138982	0.0010498	0.00126558	0.000512945	0.00168992
2-Hydroxypyridine	Organoheterocyclic compounds	3.19877e-05	3.36264e-05	2.66407e-05	3.23422e-05	3.78269e-05	3.65235e-05	3.86128e-05	3.6219e-05	3.03618e-05	3.56928e-05	4.69364e-05	3.44083e-05	3.42213e-05	3.22264e-05	3.19747e-05	3.04237e-05	6.05845e-05	3.10576e-05
1-Methylnicotinamide	Organoheterocyclic compounds	0.000160018	0.000208793	0.000234064	0.000205833	0.000262183	6.38302e-05	0.000414174	0.0003022	0.000280185	0.000177488	8.48414e-05	0.000110847	0.000164801	0.000156363	0.000196468	0.000465722	0.000305819	0.000294707
D-Proline	Organic acids and derivatives	4.67416e-05	5.11748e-05	5.41919e-05	9.58366e-05	4.61598e-05	4.52882e-05	9.55536e-05	5.69454e-05	6.86049e-05	5.28135e-05	5.13967e-05	5.68701e-05	5.76956e-05	5.27363e-05	6.87593e-05	5.60738e-05	6.21863e-05	4.6365e-05
Inosine	Nucleosides, nucleotides, and analogues	0.00336343	0.00188289	0.00155432	0.00102791	0.00145193	0.00118098	0.00120852	0.00153315	0.00189569	0.00108443	0.00130441	0.00123656	0.00126332	0.00137193	0.00199348	0.00209861	0.00218718	0.00183368
D-Maltose	Organic oxygen compounds	4.75957e-05	5.98593e-05	7.40313e-05	4.74928e-05	4.90989e-05	5.69138e-05	2.49992e-05	8.29395e-05	0.000100212	5.82091e-05	4.54401e-05	8.88323e-05	7.29815e-05	0.0001174	0.000123436	4.33544e-05	0.000121954	6.57104e-05
(E)-5-(3,4,5,6-Tetrahydro-3-pyridylidenemethyl)-2-furanmethanol	Organoheterocyclic compounds	1.07405e-05	1.70989e-05	5.81322e-06	8.12981e-06	1.62961e-05	1.55916e-05	1.47891e-05	1.61815e-05	1.51569e-05	1.47403e-05	6.98684e-06	1.13721e-05	1.30104e-05	9.75402e-06	1.48728e-05	1.5961e-05	1.8592e-05	1.04904e-05
Maltitol	Lipids and lipid-like molecules	4.28588e-05	1.38242e-05	1.86515e-05	1.66852e-05	2.02404e-05	5.15271e-06	4.26207e-06	9.69758e-06	1.1996e-05	1.0258e-05	7.50439e-06	1.49315e-05	6.63858e-06	1.59225e-05	1.48799e-05	9.46786e-06	1.64826e-05	1.28491e-05
Pyridine	Organoheterocyclic compounds	7.95165e-05	8.90522e-05	6.623e-05	7.52057e-05	8.86843e-05	8.6711e-05	9.2726e-05	8.05783e-05	8.42962e-05	7.97154e-05	0.000112288	8.44509e-05	8.07275e-05	7.35444e-05	9.55331e-05	7.09668e-05	0.000140358	7.71542e-05
3,3,5-triiodo-L-thyronine-beta-D-glucuronoside	Organic acids and derivatives	0.00361175	0.00138475	0.00131212	0.000997037	0.0011374	0.00101767	0.00136144	0.00149609	0.00159833	0.000927399	0.00155298	0.00109363	0.00121628	0.00105544	0.00188659	0.00175702	0.002231	0.00113429
N6-Methyladenosine	Nucleosides, nucleotides, and analogues	8.81775e-05	4.63272e-05	2.94928e-05	2.83908e-05	3.0277e-05	6.43726e-05	2.01718e-05	2.737e-05	4.00449e-05	4.45006e-05	3.82676e-05	5.12912e-05	3.42489e-05	3.3253e-05	4.36976e-05	4.54215e-05	5.4133e-05	4.17573e-05
Guanine	Organoheterocyclic compounds	0.000252361	0.000118125	9.48152e-05	9.0804e-05	9.59186e-05	7.8659e-05	8.61117e-05	9.67212e-05	8.60809e-05	6.55513e-05	0.000114355	5.26774e-05	7.20776e-05	9.91748e-05	9.95243e-05	0.000110789	0.000135185	0.000135665
L-Serine	Organic acids and derivatives	0.000123655	0.000109115	0.000150673	0.000211663	0.000289693	8.30581e-05	0.000133838	9.76871e-05	0.000121926	9.29792e-05	0.00022985	9.94222e-05	0.000176241	5.52464e-05	0.000147575	8.78885e-05	0.000123876	0.000116929
Deoxyadenosine	Nucleosides, nucleotides, and analogues	1.27594e-05	1.34809e-05	1.67416e-05	1.62618e-05	1.70845e-05	1.16016e-05	8.39468e-06	2.02946e-05	1.44355e-05	1.32631e-05	1.25357e-05	1.83289e-05	1.59054e-05	2.13201e-05	1.24252e-05	9.12528e-06	8.88881e-06	2.59003e-05
Stachyose	Organic oxygen compounds	1.81845e-08	2.04191e-08	8.52939e-07	3.1132e-07	1.34031e-07	4.44422e-06	9.40147e-08	7.38093e-07	6.31002e-07	4.39179e-06	1.15551e-06	9.74549e-06	1.46553e-06	4.58794e-06	2.52763e-06	1.91191e-08	6.49266e-07	3.95673e-07
Pentanenitrile	Organonitrogen compounds	2.91213e-05	6.69419e-05	3.42244e-05	3.25268e-05	3.2284e-05	5.70188e-05	5.29269e-05	2.83274e-05	6.09486e-05	6.73839e-05	9.02056e-05	4.77884e-05	4.57708e-05	3.21845e-05	5.43149e-05	4.49747e-05	4.40393e-05	4.79099e-05
L-Glutamic acid	Organic acids and derivatives	0.00369352	0.00388021	0.00392511	0.00364709	0.00519442	0.00308266	0.0041664	0.00407684	0.00432744	0.00245486	0.00384253	0.00270979	0.0031988	0.00290533	0.00501162	0.00256437	0.00352309	0.00534352
L-Phenylalanine	Organic acids and derivatives	0.00160489	0.000826528	0.0009244	0.000726271	0.00090211	0.000631769	0.000935882	0.000857556	0.0011098	0.000796967	0.00070818	0.000743894	0.000788813	0.000766787	0.00120864	0.00103483	0.0014638	0.000801779
1,6-Dimethoxy-9H-carbazole-3-carboxaldehyde	Organoheterocyclic compounds	2.29333e-05	2.09135e-05	1.71215e-05	2.40789e-05	1.82367e-05	2.05748e-05	3.43496e-05	2.29058e-05	2.40584e-05	3.35814e-05	1.64976e-05	2.12611e-05	1.95951e-05	1.88137e-05	2.51147e-05	1.90232e-05	1.27051e-05	1.40657e-05
Nervonyl carnitine	Organic nitrogen compounds	0.000186842	0.000205868	0.000149496	0.000157493	0.00013742	0.000205179	0.000186405	0.000145984	0.000228858	0.000331221	0.000232771	0.000160174	0.000212788	0.000204997	0.000169694	0.000242302	0.00031409	0.000187621
Phosphorylcholine	Organic nitrogen compounds	0.00982607	0.00508403	0.00557067	0.00466599	0.00565628	0.0057577	0.00614236	0.0067246	0.00586742	0.00775113	0.00597917	0.00591979	0.00523916	0.00718438	0.00819081	0.00734114	0.00773454	0.00681235
Adenosine 3',5'-diphosphate	Nucleosides, nucleotides, and analogues	3.89906e-07	1.64855e-05	1.51665e-05	2.01853e-05	1.87323e-05	1.9847e-05	1.79724e-05	1.38903e-05	9.17067e-06	2.12427e-05	1.9068e-05	1.93895e-05	1.52396e-05	1.77705e-05	1.30041e-05	9.66075e-06	5.32952e-06	1.51806e-05
N-Ornithyl-L-taurine	Organic acids and derivatives	0.000261666	0.000179935	0.000149303	0.000219623	0.000285521	0.000167698	0.000173647	0.000180275	0.000166563	0.000205411	0.00011012	0.000188189	0.000199428	0.000173565	0.000177465	0.000132535	9.57329e-05	0.000114349
L-Histidine	Organic acids and derivatives	0.000219084	0.000241217	0.000274767	0.000317803	0.000263168	0.000373149	0.000239451	0.000267367	0.000228431	0.000329338	0.000263993	0.000368866	0.000291901	0.000266622	0.000281024	0.000192208	0.000306901	0.000262025
Phosphoric acid	Homogeneous non-metal compounds	1.98723e-06	5.06697e-05	1.30781e-05	5.75776e-05	5.41585e-05	9.65943e-05	7.1323e-05	5.03346e-05	5.61451e-05	0.0001127	7.62843e-05	0.000116588	9.8237e-05	7.60008e-05	6.83658e-05	2.90303e-05	3.60605e-05	6.66649e-05
5-[2H-Pyrrol-4-(3H)-ylidenemethyl]-2-furanmethanol	Organoheterocyclic compounds	1.00812e-05	1.6919e-05	1.16676e-05	1.28639e-05	1.23534e-05	2.78071e-05	9.14115e-06	1.92281e-05	1.74216e-05	1.76176e-05	8.50405e-06	1.40731e-05	1.50791e-05	1.4366e-05	1.72872e-05	1.59295e-05	9.79624e-06	8.59593e-06
Indoxyl	Organoheterocyclic compounds	7.86357e-06	1.76467e-05	1.53765e-05	3.51953e-05	3.18857e-05	3.29574e-05	1.69725e-05	2.07208e-05	1.70992e-05	2.33147e-05	3.07371e-05	1.98294e-05	4.32657e-05	1.51818e-05	1.52607e-05	1.71512e-05	1.04098e-05	1.28439e-05
Valyl-Alanine	Organic acids and derivatives	9.00537e-06	6.65544e-05	3.77772e-05	1.77729e-05	1.71043e-05	3.04166e-05	1.85623e-05	2.62811e-05	2.02356e-05	3.65889e-05	2.66444e-05	2.88075e-05	1.23211e-05	3.80676e-05	5.16065e-05	2.84292e-05	8.60221e-05	1.83133e-05
Prolyl-Alanine	Organic acids and derivatives	9.55321e-05	5.55433e-06	4.5449e-06	6.07981e-06	3.74632e-06	5.54698e-06	4.72141e-06	4.32374e-06	6.11688e-05	6.65576e-06	5.79517e-06	4.898e-06	4.73188e-06	5.45647e-06	4.94015e-05	5.92508e-05	6.06695e-06	4.92735e-06
1-(2,3-Dihydro-1H-pyrrolizin-5-yl)-1,4-pentanedione	Organoheterocyclic compounds	5.3121e-06	4.14558e-06	8.56994e-06	6.73766e-06	6.3717e-06	1.50258e-05	1.67143e-05	2.31454e-05	2.01274e-05	2.14194e-05	1.40547e-05	1.2072e-05	1.50508e-05	1.02507e-05	1.48936e-05	1.50138e-05	1.27761e-05	1.41041e-05
Histamine	Organic nitrogen compounds	0.000400153	0.00148956	0.00169977	0.00119406	0.00106765	0.00103125	0.0011039	0.00119449	0.000492887	0.00151434	0.00152311	0.00176292	0.00102209	0.0014673	0.000869847	0.00182488	0.00085397	0.00107823
2-Propylpiperidine	Alkaloids and derivatives	0.00102825	0.00107232	0.00094317	0.00125756	0.00126313	0.00118802	0.00114244	0.00111421	0.0010764	0.00112272	0.00100303	0.00134572	0.00136749	0.00121336	0.0012206	0.00101922	0.00104266	0.00116374
Ethyl 3-methyl-9H-carbazole-9-carboxylate	Organoheterocyclic compounds	2.35343e-05	1.78186e-05	1.86186e-05	1.98309e-05	2.65483e-05	1.51248e-05	2.16686e-05	2.9412e-05	2.72274e-05	2.52526e-05	1.10548e-05	2.56937e-05	2.77692e-05	2.10134e-05	2.40817e-05	2.3488e-05	1.4687e-05	1.52635e-05
Riboflavin	Organoheterocyclic compounds	1.48346e-05	4.2879e-06	3.50097e-06	1.33533e-06	3.22004e-06	2.57223e-06	1.61585e-06	5.17522e-06	6.07e-06	4.31162e-06	3.63365e-06	4.23344e-06	2.94701e-06	3.88565e-06	6.48161e-06	5.6649e-06	5.50748e-06	4.7835e-06
D-Aspartic acid	Organic acids and derivatives	0.000508746	0.000663003	0.000422379	0.000653047	0.000592474	0.000242124	0.000383122	0.000458513	0.000435933	0.000172921	0.000295173	0.000223439	0.000295298	0.000192684	0.000320947	0.000407819	0.000420569	0.000548961
Pyrrolidonecarboxylic acid	Organic acids and derivatives	0.00133523	0.00143097	0.00187497	0.00151472	0.00220582	0.0014795	0.00283835	0.00209515	0.00169469	0.00269017	0.00144225	0.00180782	0.00183075	0.00130413	0.00182148	0.00104142	0.00143283	0.00193159
5'-Methylthioadenosine	Nucleosides, nucleotides, and analogues	3.10317e-06	4.47554e-06	4.42067e-06	3.97293e-06	6.74988e-06	4.09541e-06	2.76557e-06	4.0043e-06	3.87329e-06	4.122e-06	3.94029e-06	5.9142e-06	4.83654e-06	3.80273e-06	3.69277e-06	3.65895e-06	3.52576e-06	4.13512e-06
N-Hexadecanoylpyrrolidine	Organoheterocyclic compounds	2.52352e-05	4.27065e-06	6.44834e-06	1.24261e-06	3.96308e-06	2.35565e-06	2.52116e-06	8.37539e-06	1.88177e-05	3.69217e-06	2.30219e-06	4.98964e-06	2.42311e-06	4.96472e-06	1.75217e-05	1.0979e-05	3.72133e-05	7.11969e-06
2,6-Dimethylpyrazine	Organoheterocyclic compounds	0.000104108	4.55514e-05	7.85446e-05	4.37877e-05	4.34383e-05	4.6373e-05	3.25496e-05	5.45193e-05	6.04595e-05	3.24927e-05	4.91872e-05	4.32938e-05	2.86957e-05	5.53488e-05	6.38455e-05	6.25199e-05	8.59316e-05	5.34255e-05
Valdecoxib	Benzenoids	4.16932e-05	1.66072e-05	2.15861e-05	1.55836e-05	2.47101e-05	1.2884e-05	2.08662e-05	1.58386e-05	1.79869e-05	1.33685e-05	1.32737e-05	1.2496e-05	2.61991e-05	1.73452e-05	8.12145e-06	2.76376e-05	1.46661e-05	2.24967e-05
Cyclic AMP	Nucleosides, nucleotides, and analogues	1.27633e-06	3.30936e-06	2.12242e-06	2.9183e-06	2.89116e-06	2.78414e-06	2.33336e-06	2.09291e-06	2.50887e-06	2.55702e-06	2.85492e-06	2.42049e-06	2.5011e-06	2.12832e-06	2.04595e-06	2.19529e-06	2.38738e-06	2.88027e-06
Adenosine 2'-phosphate	Organic oxygen compounds	0.000741103	0.00424353	0.00218608	0.00505838	0.00380604	0.00529958	0.003079	0.00358282	0.00250061	0.00532386	0.0049087	0.0049237	0.00395014	0.00347044	0.00302668	0.00239659	0.00227308	0.00382909
Nicotinamide ribotide	Nucleosides, nucleotides, and analogues	3.36696e-07	3.37476e-06	3.21576e-06	4.21109e-06	5.17528e-06	4.55641e-06	4.4474e-06	3.05203e-06	2.3253e-06	3.81713e-06	5.6405e-06	4.64556e-06	3.35237e-06	5.77977e-06	3.43025e-06	2.3447e-06	1.6289e-06	4.27349e-06
D-Glutamine	Organic acids and derivatives	0.0118028	0.0134624	0.0119755	0.0165004	0.0133581	0.0152941	0.0199351	0.0140873	0.0138925	0.0157772	0.0155333	0.0147409	0.0129172	0.0122982	0.0163344	0.0105364	0.0140231	0.0160472
Creatine	Organic acids and derivatives	0.00208669	0.00239747	0.0019728	0.00224284	0.00230089	0.00223196	0.00185545	0.00249896	0.00255207	0.00294777	0.00265905	0.00282429	0.00278456	0.00199318	0.0027287	0.00184635	0.00221552	0.00243668
Protoanemonin	Organoheterocyclic compounds	1.81845e-08	2.04191e-08	5.73898e-06	1.99001e-08	1.85554e-08	2.99264e-05	1.76168e-08	1.78931e-08	1.14554e-05	4.72801e-05	6.1411e-06	3.68204e-05	1.99052e-08	2.1751e-05	5.11703e-05	1.91191e-08	2.39955e-05	4.57671e-06
3-Dehydrocarnitine	Organic acids and derivatives	0.000474162	0.000722636	0.000591929	0.000616424	0.000663191	0.000623026	0.000306749	0.000409736	0.000366512	0.000382725	0.000422847	0.000429016	0.000315089	0.000409528	0.000472708	0.000385461	0.000385567	0.000416625
Thiamine	Organoheterocyclic compounds	0.00027416	8.18457e-05	0.000128705	2.27637e-05	6.47857e-05	5.16565e-05	3.70396e-05	7.07895e-05	0.000200965	5.72387e-05	4.13438e-05	9.05698e-05	4.05737e-05	7.79898e-05	0.000192938	0.000115017	0.000261433	5.62003e-05
L-Valine	Organic acids and derivatives	5.05843e-05	4.16398e-05	3.53859e-05	3.67773e-05	3.42246e-05	3.42664e-05	4.55108e-05	3.48453e-05	3.30534e-05	2.99702e-05	3.28979e-05	3.07682e-05	3.09149e-05	2.97094e-05	3.62654e-05	8.53058e-05	4.22833e-05	3.72001e-05
Sphinganine	Organic nitrogen compounds	2.05112e-05	5.76194e-05	4.12992e-05	4.53071e-05	4.62861e-05	4.6953e-05	7.39994e-05	5.44052e-05	5.61815e-05	2.35098e-05	2.2364e-05	5.90447e-05	2.90403e-05	7.24764e-05	1.3416e-05	7.0427e-05	0.000123816	4.16683e-05
Isoleucyl-Alanine	Organic acids and derivatives	4.88809e-06	9.45603e-06	4.3454e-07	9.31915e-06	8.17099e-06	9.51877e-06	1.01981e-05	9.74555e-06	3.70089e-06	7.25685e-06	6.8414e-06	1.18527e-05	5.38693e-06	9.86616e-06	7.84685e-06	1.47154e-05	4.9525e-06	6.50963e-06
D-Arabinose 5-phosphate	Organic oxygen compounds	1.13516e-05	8.29568e-05	7.56036e-05	4.80296e-05	2.41523e-05	0.000223122	1.91529e-05	3.58425e-05	0.000105056	0.000259572	8.34845e-05	0.000226817	8.03095e-05	0.000190112	0.000191052	3.85942e-05	0.000155472	9.92363e-05
Neocretanin	Organic oxygen compounds	6.93177e-06	4.57979e-05	1.7193e-05	1.47685e-05	1.35868e-05	1.10904e-05	1.41403e-05	2.10414e-05	6.34526e-05	1.24833e-05	1.15253e-05	2.57471e-05	3.83587e-05	2.06219e-05	3.92597e-05	2.7982e-05	6.58021e-05	2.4637e-05
Valyl-Proline	Organic acids and derivatives	7.7894e-05	0.000102445	0.000111639	0.000146474	0.000111182	0.000106921	0.00012164	0.000107545	0.000109561	0.000118713	0.000135567	0.000158451	0.000141199	0.000103079	0.000110122	7.16201e-05	0.000120572	0.000128015
L-Acetylcarnitine	Lipids and lipid-like molecules	0.0160738	0.00785773	0.00946047	0.00811069	0.011985	0.00946645	0.00835127	0.00427272	0.00661194	0.00642417	0.0106737	0.00370611	0.0134002	0.00945075	0.0111997	0.00847172	0.00551319	0.00696072
(Â±)-Tryptophan	Organoheterocyclic compounds	8.2274e-05	5.47092e-05	4.47553e-05	4.13959e-05	5.65343e-05	5.36085e-05	5.97257e-05	5.48459e-05	5.23274e-05	5.6278e-05	5.39569e-05	4.56775e-05	5.63735e-05	4.11298e-05	6.35361e-05	3.87439e-05	6.56724e-05	5.53942e-05
Methyl 2-aminobenzoate	Benzenoids	1.74229e-05	1.26216e-05	1.16392e-05	2.12023e-05	1.85322e-05	1.68661e-05	1.64781e-05	1.69825e-05	1.8246e-05	2.11055e-05	1.68849e-05	1.8396e-05	1.6571e-05	1.85104e-05	1.54548e-05	1.39911e-05	1.35306e-05	1.81274e-05
D-Alanyl-D-alanine	Organic acids and derivatives	9.04445e-06	1.85306e-05	1.479e-05	2.51656e-05	1.87869e-05	2.12251e-05	2.30557e-05	1.65707e-05	1.23553e-05	1.67719e-05	1.50301e-05	1.77712e-05	1.28489e-05	1.79123e-05	1.52092e-05	1.50483e-05	8.18183e-06	1.93049e-05
L-Threonine	Organic acids and derivatives	0.000161984	0.000185753	0.000310678	0.00038737	0.000479313	8.2743e-05	8.94622e-05	0.000178867	0.000187312	0.000130182	0.00017755	0.00012733	0.000175042	0.000105776	0.000203029	0.000132506	0.000178985	0.00013209
Propionylcarnitine	Lipids and lipid-like molecules	0.00144225	0.003051	0.00330761	0.00395643	0.00243403	0.00142928	0.00173552	0.00224183	0.00111261	0.00176142	0.000988626	0.00244244	0.00332789	0.00280987	0.00215557	0.00272932	0.00180959	0.00174163
Methylpyrazine	Organoheterocyclic compounds	0.000122813	0.00044183	0.000512549	0.000353897	0.000324283	0.00027146	0.000326854	0.000353246	0.000148553	0.000452711	0.000456444	0.000521115	0.00030488	0.000441024	0.00026182	0.000545511	0.000267102	0.000333381
Racemethionine	Organic acids and derivatives	0.000633128	0.000559705	0.00102945	0.000987145	0.000962312	0.000211351	0.000341537	0.000403076	0.000563877	0.000380312	0.000342619	0.000306498	0.000535944	0.000457154	0.000475436	0.00049599	0.000755906	0.00044979
Glycerol 3-phosphate	Lipids and lipid-like molecules	5.77736e-06	6.39589e-05	1.06577e-05	8.47869e-05	7.50326e-05	0.000137806	0.000110377	6.86278e-05	5.40815e-05	0.000154484	0.000109308	0.000131332	0.000134713	9.19685e-05	8.60963e-05	2.90127e-05	3.14068e-05	9.7718e-05
Acetylhydrazine	Organic acids and derivatives	5.2878e-05	4.5912e-05	6.23563e-05	7.79636e-05	8.75026e-05	4.06179e-05	4.66669e-05	3.74702e-05	5.13339e-05	4.40809e-05	6.90742e-05	4.32538e-05	6.74754e-05	3.10579e-05	5.19661e-05	4.54496e-05	5.03196e-05	4.32865e-05
Aminoacetone	Organic oxygen compounds	2.22939e-05	2.30281e-05	3.59545e-05	3.90346e-05	4.6393e-05	1.45669e-05	9.62107e-06	2.33547e-05	2.14516e-05	1.6878e-05	2.17828e-05	1.21285e-05	2.19818e-05	1.39631e-05	2.23341e-05	2.11719e-05	1.99348e-05	1.98657e-05
Glycyl-Valine	Organic acids and derivatives	9.29983e-06	1.36779e-05	1.06817e-05	4.33212e-06	6.23595e-06	6.09686e-06	6.10494e-06	7.83412e-06	8.44623e-06	5.75625e-06	5.47376e-06	8.21353e-06	3.75283e-06	9.53829e-06	1.28157e-05	1.13542e-05	2.49551e-05	5.50774e-06
Methionine sulfoxide	Organic acids and derivatives	8.78477e-06	9.28548e-06	2.6339e-05	2.79167e-05	2.40354e-05	3.37889e-06	1.3048e-05	1.43786e-05	1.49398e-05	5.83663e-06	6.25778e-06	5.57331e-06	1.37168e-05	8.94523e-06	1.00622e-05	1.03993e-05	1.14521e-05	8.51602e-06
5'-Deoxyadenosine	Nucleosides, nucleotides, and analogues	3.87127e-07	1.59611e-06	9.88673e-07	8.74493e-06	4.16101e-06	4.46321e-06	4.08318e-06	1.09252e-05	1.52593e-06	6.44686e-06	1.69669e-05	4.79549e-06	1.02832e-05	1.1365e-05	4.99204e-06	2.22837e-06	1.96625e-06	1.33533e-05
4-Coumaroyl-2-hydroxyputrescine	Phenylpropanoids and polyketides	5.56132e-05	5.35022e-05	5.1498e-05	7.20864e-05	6.17806e-05	7.10713e-05	6.1988e-05	6.82812e-05	5.95546e-05	6.51482e-05	7.39755e-05	7.46758e-05	6.57806e-05	6.03138e-05	6.44242e-05	4.60592e-05	5.45347e-05	6.77929e-05
S-Adenosylhomocysteine	Nucleosides, nucleotides, and analogues	5.18914e-05	1.88973e-05	1.77697e-05	1.29014e-05	1.54029e-05	1.18251e-05	1.2637e-05	1.66721e-05	2.52629e-05	1.46393e-05	1.51483e-05	1.53448e-05	1.09307e-05	1.37173e-05	2.92359e-05	2.11071e-05	2.62363e-05	1.53634e-05
L-Glutamine	Organic acids and derivatives	0.000618442	0.00104395	0.00086258	0.00105586	0.00096884	0.00120347	0.00147629	0.00100884	0.000974366	0.00118814	0.000953965	0.00123868	0.00102911	0.00353868	0.000974638	0.000750017	0.000934746	0.00114094
2-Hydroxyadenine	Organoheterocyclic compounds	5.77834e-07	8.12614e-06	6.69294e-06	2.25006e-05	1.06773e-05	1.26573e-05	1.22772e-05	1.03243e-05	5.25402e-06	1.20481e-05	1.04654e-05	1.31817e-05	1.48729e-05	9.71662e-06	3.87199e-06	5.4021e-06	2.72108e-06	1.15448e-05
L-Palmitoylcarnitine	Lipids and lipid-like molecules	0.000109962	5.28599e-05	7.23129e-05	0.000618946	0.000122519	0.00290131	0.00183132	0.000227412	0.000610082	0.000755096	0.00577012	0.000539218	0.000287252	0.00337089	0.000203268	0.000306683	0.000197442	0.00142521
N-gamma-Glutamylglutamine	Organic acids and derivatives	1.70861e-06	1.95771e-06	2.39432e-06	1.87753e-06	2.1293e-06	9.23504e-07	1.09679e-06	1.3803e-06	1.50503e-06	1.22061e-06	1.66283e-06	1.56675e-06	1.46333e-06	1.77895e-06	1.67164e-06	1.39225e-06	1.57946e-06	1.30629e-06
Lauroyl diethanolamide	Lipids and lipid-like molecules	5.88104e-06	4.81248e-06	5.77532e-06	5.12947e-06	5.12064e-06	5.09835e-06	4.31108e-06	4.68578e-06	8.04175e-06	4.94343e-06	4.83759e-06	4.59566e-06	4.77862e-06	4.63733e-06	4.28537e-06	4.81468e-06	5.30698e-06	5.0045e-06
Ureidopropionic acid	Organic acids and derivatives	6.95358e-06	1.09808e-05	9.73569e-06	1.50944e-05	9.44647e-06	1.08333e-05	7.18125e-06	3.40409e-06	5.38834e-06	5.13352e-06	2.57427e-06	3.03546e-06	2.99575e-06	4.22518e-06	3.66692e-06	4.34382e-06	5.44981e-06	4.98665e-06
3,4-Dihydroxy-2-hydroxymethyl-1-pyrrolidinepropanamide	Organoheterocyclic compounds	5.24837e-06	3.04751e-05	1.5344e-05	1.26208e-05	1.32322e-05	1.57058e-05	1.35455e-05	1.80908e-05	8.7958e-06	1.52386e-05	1.61613e-05	2.27445e-05	9.6582e-06	1.80725e-05	1.97695e-05	1.78581e-05	2.66828e-05	1.53796e-05
N-Methylhistamine	Organic nitrogen compounds	0.000347463	0.000126043	0.000278864	8.65617e-05	0.000149932	8.45734e-05	8.03644e-05	0.000184756	0.000189179	7.30043e-05	0.000135683	0.000126766	6.51689e-05	0.000163116	0.000204165	0.000213696	0.000302242	0.000128037
Proline betaine	Organic acids and derivatives	9.44703e-06	1.77072e-05	1.1578e-05	9.90163e-06	1.4428e-05	1.26262e-05	1.65325e-05	8.86568e-06	6.93022e-06	2.59207e-06	2.36514e-06	2.48597e-06	3.12156e-06	3.1262e-06	1.29043e-05	1.22685e-05	4.51752e-06	5.78783e-06
Prolyl-Aspartate	Organic acids and derivatives	7.03895e-05	8.06674e-05	5.32882e-05	7.32561e-05	7.31397e-05	8.01664e-05	5.80587e-05	7.23237e-05	6.26529e-05	9.07361e-05	8.29989e-05	8.96029e-05	6.89392e-05	6.79221e-05	7.59817e-05	4.91252e-05	6.31566e-05	7.32822e-05
Ethylphosphate	Organic acids and derivatives	4.68065e-05	5.44167e-07	6.27601e-05	6.8725e-05	6.08726e-05	7.72903e-05	6.8305e-05	6.78332e-05	5.76155e-05	6.98048e-05	6.47803e-05	9.86618e-05	9.5437e-05	7.91901e-05	4.99006e-05	6.27074e-05	5.88177e-05	6.48808e-05
2-Aminoacrylic acid	Organic acids and derivatives	6.61748e-05	7.85126e-05	5.55888e-05	8.49218e-05	7.62947e-05	3.10366e-05	4.87527e-05	5.91752e-05	5.70406e-05	2.23987e-05	4.26297e-05	2.99954e-05	3.01278e-05	2.36906e-05	4.16862e-05	5.20957e-05	5.35083e-05	6.85658e-05
Inosinic acid	Nucleosides, nucleotides, and analogues	0.000266373	0.000291459	0.000565418	0.000168972	0.000374327	0.000294919	0.000155126	0.000342148	0.000688583	0.0004951	0.000275783	0.000376215	0.000111787	0.000270283	0.000864499	0.000217169	0.000739028	0.00027229
LysoPE(16:0/0:0)	Lipids and lipid-like molecules	0.000635891	0.00017234	0.00020822	0.000102868	0.000212439	0.000125037	0.000104007	0.000257463	0.000522338	0.000117947	0.000126855	0.000177608	0.000107892	0.000224651	0.000498114	0.000341009	0.000945746	0.000240527
Oleamide	Lipids and lipid-like molecules	0.000241689	0.000269243	0.000258105	0.000129947	0.000118066	0.000236236	0.000160137	0.000130256	0.000176109	0.000217538	0.000120075	0.000151328	0.000172675	0.000174516	0.000233589	0.000204272	0.000308794	0.000132515
Trimethylamine N-oxide	Organic nitrogen compounds	0.00077468	0.00033717	0.000230593	0.000169802	0.000269585	0.000293849	0.000235034	0.00056419	0.000332584	0.000295133	0.000181658	0.000283768	0.000319168	0.000284193	0.000303561	0.000852219	0.000299654	0.000241677
Taurine	Organic acids and derivatives	1.81845e-08	2.04191e-08	1.98904e-08	2.03018e-06	8.47775e-05	1.17166e-05	1.97301e-05	6.20035e-05	3.0467e-06	1.99954e-08	1.75738e-08	4.99267e-05	8.33671e-06	1.88971e-08	1.78742e-08	1.91191e-08	1.88486e-08	4.40418e-06
DL-Glutamate	Organic acids and derivatives	0.000132458	0.000165115	0.000183294	0.000158466	0.000233687	0.000144892	0.000149846	0.000183514	0.000188821	0.000118746	0.000163922	0.000144644	0.000163604	0.00013948	0.000170928	0.000129415	0.000140914	0.000243476
Tetradecanoylcarnitine	Lipids and lipid-like molecules	1.32638e-06	2.04191e-08	1.98904e-08	3.03661e-05	7.19616e-06	0.000125473	6.86303e-05	1.09359e-05	3.50154e-05	4.08024e-05	0.000260408	2.26669e-05	1.39877e-05	0.000108097	5.5177e-06	1.12565e-05	2.3636e-06	4.65123e-05
1-Methyl 2-galloylgalactarate	Organic oxygen compounds	3.24071e-06	4.54561e-06	4.88699e-06	5.0437e-06	4.28752e-06	3.86844e-06	4.87946e-06	4.03818e-06	4.33224e-06	3.23194e-06	3.28578e-06	3.87009e-06	4.13218e-06	3.95431e-06	4.08068e-06	4.83318e-06	4.35808e-06	4.26899e-06
Pantothenic acid	Organooxygen compounds	0.000946665	0.000993877	0.00162629	0.00110157	0.00105692	0.0020205	0.00120577	0.00221369	0.00212804	0.00276443	0.00314199	0.00281104	0.0025432	0.00224058	0.00281321	0.00181427	0.00152686	0.00143728
Citrulline	Organic acids and derivatives	0.000544013	0.000826198	0.000750169	0.000787795	0.00104599	0.00110222	0.00100564	0.0011023	0.000781673	0.00104807	0.00131403	0.000985857	0.000797793	0.000893473	0.00136263	0.000910962	0.0012303	0.00102771
Anserine	Organic acids and derivatives	0.000196675	0.00016259	0.000203286	0.000199786	0.000250812	0.000146136	0.000253646	0.000158542	0.000151175	0.000101041	0.000237368	0.000153348	0.000172571	0.000135227	0.000129752	0.000180365	0.000172649	0.000151125
Dodecanoylcarnitine	Lipids and lipid-like molecules	5.68472e-06	1.32916e-06	2.74881e-06	6.90139e-05	3.55084e-05	0.00024197	0.00016647	4.44249e-05	0.00010407	0.000125631	0.000468739	7.72549e-05	5.45143e-05	0.00018314	3.19155e-05	2.52619e-05	1.08378e-05	9.12233e-05
NAD	Nucleosides, nucleotides, and analogues	1.04211e-06	2.5712e-06	3.73465e-06	8.23577e-05	1.37353e-05	9.49361e-06	3.46709e-05	3.45207e-06	1.53318e-05	2.87785e-05	5.51358e-05	2.7097e-05	3.9745e-05	4.74165e-05	3.61519e-05	3.6268e-06	7.17279e-06	5.15578e-05
Diethanolamine	Organic nitrogen compounds	1.29801e-05	2.05242e-05	4.87832e-05	1.42156e-05	3.27718e-05	0.00102597	2.47507e-05	3.76127e-05	4.03154e-05	6.89458e-05	1.19267e-05	6.08167e-05	2.85718e-05	2.5221e-05	2.6802e-05	3.55726e-05	6.67615e-05	4.79944e-05
L-Arginine	Organic acids and derivatives	0.00213495	0.00159038	0.00134729	0.0010207	0.00137237	0.00168758	0.00282893	0.00188346	0.00387609	0.00267168	0.00196728	0.00287516	0.00188486	0.00183016	0.00409325	0.00288535	0.00220507	0.00227817
Glutathione	Organic acids and derivatives	1.15816e-05	0.000149974	6.0874e-05	0.000108662	0.00012692	8.75772e-05	0.000112227	0.000134074	7.03558e-05	0.000138939	0.000145719	0.000110407	4.95342e-05	6.81929e-05	0.000112769	3.17124e-05	5.58606e-05	0.000103324
Phenylalanyl-Serine	Organic acids and derivatives	3.56536e-06	2.0846e-05	9.2329e-06	5.31125e-06	6.20277e-06	9.27297e-06	8.52854e-06	9.51163e-06	5.94929e-06	9.04941e-06	7.66579e-06	1.24843e-05	4.84666e-06	9.53079e-06	1.24642e-05	1.55659e-05	1.45693e-05	7.31056e-06
Norvaline	Organic acids and derivatives	0.000765848	0.00042862	0.000821752	0.00032892	0.000383641	0.000347271	0.000498343	0.000453076	0.000472363	0.000308939	0.000332097	0.000389013	0.000341081	0.000298349	0.000489228	0.000482	0.000567284	0.000409402
4-Hydroxy-2-butenoic acid gamma-lactone	Organoheterocyclic compounds	2.22375e-05	2.86273e-05	2.44604e-05	2.71425e-05	2.62786e-05	2.71869e-05	2.32224e-05	2.66488e-05	2.53503e-05	2.56503e-05	2.47374e-05	2.52754e-05	2.76179e-05	2.69309e-05	2.47162e-05	2.49356e-05	2.56634e-05	2.41823e-05
S-Adenosylmethionine	Nucleosides, nucleotides, and analogues	1.36763e-05	2.67271e-05	2.25694e-05	2.81962e-05	2.09334e-05	3.35955e-05	1.28005e-05	2.21597e-05	1.24835e-05	3.74224e-05	2.76711e-05	3.7114e-05	2.38128e-05	3.028e-05	3.04324e-05	8.20211e-06	2.35846e-05	2.41481e-05
Asymmetric dimethylarginine	Organic acids and derivatives	0.000180278	0.000176677	0.000114714	0.00014543	0.000115762	0.000307016	0.000125224	0.00011152	0.000142774	0.000256332	0.000219187	0.000304097	0.000150799	0.000202179	0.000156766	0.000143086	0.000186932	0.000159025
Homocitrulline	Organic acids and derivatives	0.000143148	0.000114052	0.000113592	0.000121212	0.000126795	0.000286603	0.000231671	0.000129312	0.000109599	0.000145601	0.000171761	0.000136009	0.000140215	0.000193414	0.00011409	0.000119206	0.000124235	0.000142893
Pyrimidine	Organoheterocyclic compounds	2.5768e-05	2.29406e-05	1.10913e-05	1.48677e-05	1.30085e-05	1.12024e-05	1.80662e-05	2.08742e-05	1.22462e-05	9.70651e-06	2.23284e-05	1.70816e-05	1.75551e-05	9.75966e-06	1.3807e-05	1.58225e-05	1.95413e-05	1.2011e-05
3-Aminobutanoic acid	Organic acids and derivatives	0.000222063	8.10572e-05	8.3033e-05	2.91512e-05	7.37719e-05	3.34392e-05	3.40431e-05	5.74568e-05	0.00020241	5.54179e-05	4.19436e-05	5.61464e-05	7.30393e-05	5.96712e-05	0.00010527	0.000118829	0.000117587	0.00014013
Marshdine	Organoheterocyclic compounds	1.15084e-05	1.42804e-05	9.06414e-06	9.42798e-06	8.51645e-06	6.4864e-06	6.97323e-06	9.64325e-06	6.83806e-06	1.24298e-05	9.5226e-06	7.53632e-06	9.39528e-06	1.29175e-05	9.69098e-06	6.7014e-06	9.62187e-06	9.0288e-06
L-trans-4-Methyl-2-pyrrolidinecarboxylic acid	Organic acids and derivatives	8.70359e-05	0.00016027	0.000118256	0.000105779	6.21861e-05	0.000130621	0.000118399	8.34504e-05	0.00013058	0.00013233	0.000136274	0.000123656	9.86157e-05	0.000112477	0.000236049	0.000105658	0.000127709	0.000107774
L-Targinine	Organic acids and derivatives	2.44597e-05	2.48338e-05	2.84363e-05	2.45944e-05	2.12473e-05	4.36561e-05	5.32236e-05	3.23485e-05	3.28108e-05	3.3917e-05	3.25215e-05	3.84464e-05	3.36713e-05	3.4081e-05	4.59083e-05	3.20358e-05	3.20605e-05	2.94077e-05
Benzyl cinnamate	Phenylpropanoids and polyketides	7.31093e-06	2.18847e-05	1.04922e-05	1.08628e-05	9.73129e-06	9.00909e-06	9.97664e-06	1.7568e-05	9.8838e-06	1.88584e-05	8.01546e-06	1.18528e-05	1.07237e-05	8.59635e-06	1.30957e-05	1.10683e-05	1.60441e-05	9.47115e-06
4-Acetylimidazo[4,5-c]pyridine	Organoheterocyclic compounds	7.0802e-05	4.19742e-05	4.06373e-05	5.48706e-05	4.68674e-05	2.8969e-05	5.10236e-05	4.2517e-05	4.48685e-05	3.17942e-05	2.7847e-05	2.67707e-05	1.40656e-05	3.12689e-05	5.15623e-05	5.36078e-05	3.85135e-05	2.8496e-05
Pseudouridine 5'-phosphate	Organic oxygen compounds	3.27126e-06	1.37736e-05	1.10637e-05	1.76566e-05	1.46586e-05	1.51189e-05	7.00879e-06	7.31885e-06	7.32636e-06	2.05358e-05	1.79741e-05	1.55783e-05	8.44257e-06	1.18447e-05	1.26653e-05	5.56009e-06	6.91702e-06	1.22957e-05
Leucyl-Isoleucine	Organic acids and derivatives	2.53714e-05	0.000367086	8.58059e-05	0.000111322	0.00013826	0.000130581	0.00013208	0.000210264	6.99507e-05	0.000154243	0.000148166	0.000353332	0.000145714	0.000197703	0.000140613	0.000154528	9.68118e-05	0.000186495
3alpha,4,5,7alpha-Tetrahydro-5-hydroxy-1H-isoindole-1,3(2H)-dione	Organoheterocyclic compounds	4.24049e-05	1.03697e-05	1.68009e-05	1.35494e-05	1.47465e-05	7.34156e-06	1.71692e-05	1.80556e-05	3.22463e-05	7.87255e-06	1.01233e-05	1.2517e-05	1.64208e-05	1.85591e-05	2.02076e-05	1.83431e-05	1.80439e-05	2.04113e-05
4-Hydroxy-1H-indole-3-acetonitrile	Organoheterocyclic compounds	2.1983e-05	1.3058e-05	6.78895e-06	9.14008e-06	1.17762e-05	1.55143e-05	1.45918e-05	1.11318e-05	1.20168e-05	1.01698e-05	1.17921e-05	7.89224e-06	2.48464e-05	8.36071e-06	1.13671e-05	1.37519e-05	2.41632e-05	1.04077e-05
2,3,4,5-Tetrahydropiperidine-2-carboxylate	Organic acids and derivatives	0.00026563	0.000241951	0.000214691	0.000141438	0.000208532	4.09128e-05	0.000191992	0.000220758	0.000218522	0.000189673	0.000222927	0.000184443	0.000207948	5.50005e-05	0.000251831	0.000256475	9.13924e-05	0.000184061
LysoPE(0:0/18:3(6Z,9Z,12Z))	Lipids and lipid-like molecules	1.9609e-05	2.39109e-06	2.03848e-06	2.09185e-06	8.62455e-06	2.78501e-06	3.73555e-06	8.64869e-06	1.21669e-05	1.70764e-06	1.49345e-06	7.88151e-06	3.78567e-06	5.56192e-06	7.70535e-06	5.9346e-06	8.45551e-06	8.28583e-06
N-Methylhydantoin	Organoheterocyclic compounds	2.30772e-05	2.33743e-05	1.96414e-05	2.66382e-05	2.16244e-05	2.28717e-05	1.75987e-05	2.06389e-05	2.3916e-05	2.24626e-05	1.87541e-05	2.19796e-05	2.68351e-05	1.74428e-05	1.94726e-05	1.85348e-05	2.5527e-05	2.36716e-05
Guanidoacetic acid	Organic acids and derivatives	1.20598e-05	1.48158e-05	1.15125e-05	1.25476e-05	1.37818e-05	7.04383e-06	1.14232e-05	1.2322e-05	1.44248e-05	8.92059e-06	9.38012e-06	7.18429e-06	1.17016e-05	8.33626e-06	1.37719e-05	1.00435e-05	9.22099e-06	1.63165e-05
Vanilloside	Organic oxygen compounds	4.40796e-05	3.58267e-05	0.000172561	4.66746e-05	1.64415e-05	1.92351e-05	1.51575e-05	1.79279e-05	2.2293e-05	0.000120392	3.81885e-05	1.5705e-05	2.45024e-05	5.9694e-05	6.99353e-05	0.000100022	0.000111606	2.50412e-05
Carnosine	Organic acids and derivatives	0.000110405	0.000152423	0.000129968	0.00011703	0.000167963	0.000201736	0.000237466	0.000110458	7.75491e-05	8.83272e-06	8.90893e-06	0.00015386	0.00018058	7.07322e-06	0.000127955	0.000144812	3.24682e-06	0.000132083
LysoPE(16:1(9Z)/0:0)	Lipids and lipid-like molecules	9.55495e-06	1.69174e-06	2.21031e-06	3.93785e-07	2.74063e-06	8.05892e-07	6.11111e-07	2.63837e-06	1.07671e-05	9.79476e-07	2.47668e-07	5.93418e-06	1.8008e-06	1.77408e-06	8.35575e-06	8.30591e-06	1.18225e-05	3.84329e-06
Subaphylline	Phenylpropanoids and polyketides	5.4324e-06	0.000143019	2.90583e-05	5.40459e-05	6.78672e-05	7.88397e-05	7.28971e-05	0.000126723	3.5245e-05	9.75245e-05	9.32433e-05	0.00021101	0.000132498	0.000126253	6.60776e-05	7.30706e-05	4.9582e-05	7.59425e-05
3-Dehydroxycarnitine	Lipids and lipid-like molecules	0.00313553	0.00428943	0.00300906	0.00377152	0.00336	0.00250767	0.00446057	0.00225844	0.00207858	0.00176047	0.00202041	0.00214261	0.00202783	0.00187095	0.00276479	0.00245556	0.00185893	0.00199319
Ecgonine	Alkaloids and derivatives	6.29764e-05	8.98587e-05	8.03354e-05	9.09297e-05	6.4706e-05	7.84307e-05	8.88786e-05	8.07471e-05	8.60904e-05	0.000105614	7.20067e-05	8.44788e-05	8.11295e-05	9.39515e-05	8.32767e-05	6.329e-05	0.000105074	8.112e-05
Tyrosine methylester	Organic acids and derivatives	1.08913e-05	1.78379e-05	2.10492e-05	2.67157e-05	1.54929e-05	2.81492e-05	1.47518e-05	1.83125e-05	1.8382e-05	2.83733e-05	2.30909e-05	2.11849e-05	1.69708e-05	2.18051e-05	1.86539e-05	1.51225e-05	2.80216e-05	1.8157e-05
S-(2-Methylbutanoyl)-dihydrolipoamide	Lipids and lipid-like molecules	3.47091e-06	6.76125e-06	5.28564e-06	7.9817e-06	5.93356e-06	1.76102e-05	1.32408e-05	1.234e-05	8.51638e-06	1.41801e-05	1.37984e-05	1.21528e-05	8.98918e-06	1.55178e-05	8.55842e-06	4.08498e-06	1.37552e-05	6.96347e-06
2-(3,4-Dihydroxybenzoyloxy)-4,6-dihydroxybenzoate	Phenylpropanoids and polyketides	0.000438473	0.000159684	0.000125385	0.000249612	0.000296536	0.000264684	0.000258546	0.000280126	0.000340402	0.000216024	0.000226644	0.00028416	0.000279971	0.000288184	0.000253501	0.000300045	0.000145634	0.000316545
1,2,3,4-Tetrahydro-b-carboline-1,3-dicarboxylic acid	Alkaloids and derivatives	5.39556e-06	6.41231e-06	6.42263e-06	5.5323e-06	4.08308e-06	5.53679e-06	5.582e-06	5.25782e-06	1.06885e-05	6.6382e-06	7.11914e-06	4.5062e-06	5.69576e-06	6.99541e-06	5.23379e-06	6.22006e-06	5.70018e-06	5.15423e-06
Threoninyl-Arginine	Organic acids and derivatives	7.94401e-06	2.22164e-05	1.71921e-05	6.24573e-06	1.3629e-05	1.68812e-05	1.80048e-05	1.75624e-05	1.2623e-05	1.15771e-05	1.15093e-05	1.5507e-05	8.32721e-06	1.91216e-05	2.09453e-05	2.3535e-05	2.23276e-05	1.32837e-05
Tyrosyl-Leucine	Organic acids and derivatives	1.79572e-06	1.05385e-05	4.64393e-06	4.39183e-06	5.20092e-06	4.88239e-06	5.72402e-06	6.25188e-06	1.79781e-06	6.33986e-06	3.95882e-06	7.67284e-06	4.22815e-06	7.24504e-06	7.87567e-06	7.8906e-06	4.3632e-06	5.52626e-06
Phenylalanyl-Arginine	Organic acids and derivatives	2.17572e-06	3.12266e-05	1.37518e-05	4.66145e-06	5.4308e-06	9.90198e-06	9.33199e-06	1.31542e-05	5.06333e-06	1.01307e-05	7.85712e-06	1.50426e-05	4.89448e-06	1.29813e-05	1.7717e-05	2.03945e-05	3.38413e-05	8.74543e-06
Citicoline	Nucleosides, nucleotides, and analogues	2.78432e-05	6.38412e-05	4.17349e-05	5.70424e-05	6.1268e-05	4.44171e-05	3.05212e-05	4.89849e-05	4.31885e-05	5.51489e-05	4.24426e-05	5.98596e-05	3.90593e-05	3.54815e-05	5.4643e-05	3.00561e-05	4.25705e-05	4.12449e-05
Alitame	Organic acids and derivatives	6.01906e-06	2.15073e-05	1.20388e-05	1.91554e-05	1.45159e-05	2.20051e-05	9.38023e-06	2.75561e-05	1.8303e-05	1.66963e-05	1.9836e-05	2.02501e-05	1.84722e-05	2.30297e-05	2.72431e-05	8.68991e-06	1.45307e-05	2.38342e-05
Heptadecanoyl carnitine	Lipids and lipid-like molecules	1.84458e-06	4.2124e-06	1.93372e-06	2.17397e-05	8.18261e-06	6.64717e-05	8.75458e-05	4.21743e-06	1.28643e-05	1.5086e-05	0.000133866	1.91194e-05	9.22158e-06	6.91242e-05	5.79084e-06	6.68632e-06	5.0778e-06	3.56243e-05
Leucyl-Methionine	Organic acids and derivatives	1.83039e-06	3.1997e-05	6.18913e-06	1.49075e-05	1.48947e-05	1.7283e-05	1.33225e-05	2.16764e-05	8.00327e-06	2.0763e-05	1.78798e-05	4.5533e-05	1.70454e-05	3.14008e-05	1.72127e-05	2.21416e-05	1.05953e-05	1.87255e-05
Phenylalanyl-Tyrosine	Organic acids and derivatives	1.05718e-06	8.18636e-06	3.53632e-06	3.35352e-06	4.40163e-06	7.37205e-06	6.79517e-06	1.11006e-05	3.99844e-06	5.13343e-06	6.09793e-06	1.27118e-05	7.511e-06	9.0049e-06	7.40527e-06	5.96359e-06	4.4115e-06	4.03547e-06
Isoniazid alpha-ketoglutaric acid	Organoheterocyclic compounds	5.47268e-05	2.60669e-05	4.41818e-05	6.3526e-05	5.28766e-05	6.39588e-05	2.67275e-05	3.68196e-05	5.1583e-05	6.67021e-05	6.69683e-05	4.16154e-05	3.85986e-05	7.49836e-05	6.61162e-05	3.41525e-05	2.48238e-05	6.12907e-05
Ethoxyquin	Organoheterocyclic compounds	1.76508e-07	5.54247e-07	4.81928e-07	3.72959e-06	1.85724e-06	9.79004e-07	1.75513e-05	1.97559e-06	1.99167e-06	1.99096e-06	1.2978e-06	2.10946e-06	1.17805e-06	2.55491e-06	3.16117e-06	5.66561e-06	1.4672e-06	1.51434e-06
3-Methylhistidine	Organic acids and derivatives	0.000163967	0.000169133	8.0745e-05	0.000211081	0.000122674	0.000136374	1.69793e-05	2.70732e-05	3.60524e-05	6.25239e-05	9.62703e-05	7.55194e-05	6.1023e-05	5.27015e-05	5.17666e-05	3.68449e-05	5.3943e-05	6.7254e-05
beta-Vatirenene	Lipids and lipid-like molecules	6.42367e-06	9.77308e-06	1.07532e-05	7.41001e-06	5.91737e-06	5.47455e-06	5.55483e-06	5.5578e-06	5.87669e-06	6.25568e-06	3.47561e-06	4.55489e-06	3.80917e-06	5.27849e-06	7.12573e-06	5.02827e-06	7.22705e-06	4.23533e-06
4-Pyridoxolactone	Organoheterocyclic compounds	8.17538e-05	5.14474e-05	3.6586e-05	6.29259e-05	3.89677e-05	6.34868e-05	4.10907e-05	3.48873e-05	3.94122e-05	4.38794e-05	5.40124e-05	5.34214e-05	1.86082e-05	6.04599e-05	3.70282e-05	7.39669e-05	5.65948e-05	4.68026e-05
Valyl-Threonine	Organic acids and derivatives	1.90015e-05	0.000122026	6.02008e-05	2.18815e-05	2.98437e-05	4.34004e-05	4.63506e-05	6.9227e-05	2.25086e-05	5.92339e-05	3.5781e-05	9.42494e-05	3.15613e-05	7.06671e-05	7.83807e-05	5.925e-05	8.907e-05	4.36576e-05
L-Tyrosine	Organic acids and derivatives	0.000175852	0.000112575	0.000107413	0.000126245	0.000105184	5.29384e-05	0.000131222	9.42541e-05	0.000104975	7.62426e-05	6.65394e-05	4.68957e-05	6.44427e-05	5.88826e-05	0.000126325	9.61704e-05	0.000138377	8.20954e-05
2-Acetyloxazole	Organic oxygen compounds	7.30938e-06	9.57515e-06	8.56472e-05	1.99001e-08	6.67799e-06	1.41552e-05	6.12245e-06	1.13501e-05	8.95872e-05	1.34744e-05	8.21617e-06	0.000134172	1.02831e-05	1.11842e-05	1.10477e-05	7.32829e-06	1.58099e-05	1.12018e-05
Galactose 1-phosphate	Organic oxygen compounds	2.86609e-06	2.12983e-05	1.90112e-05	1.24637e-05	6.13978e-06	6.20268e-05	5.03811e-06	8.82405e-06	2.33537e-05	7.63802e-05	2.23588e-05	6.43271e-05	2.17209e-05	5.16982e-05	5.81643e-05	8.49857e-06	4.0876e-05	2.74238e-05
Leucyl-Valine	Organic acids and derivatives	7.75466e-06	0.000225051	3.94605e-05	8.10343e-05	8.55522e-05	8.00386e-05	7.95281e-05	0.000122364	3.38213e-05	0.000108622	0.000107809	0.000253654	9.40386e-05	0.000115177	7.55683e-05	7.96037e-05	5.21413e-05	0.000118083
Quinone	Organic oxygen compounds	1.81845e-08	1.02595e-05	4.97254e-06	1.48845e-06	1.85554e-08	4.40504e-05	1.76168e-08	1.78931e-08	1.08227e-05	5.73199e-05	1.56852e-05	5.03487e-05	3.73206e-06	3.43883e-05	4.53776e-05	1.91191e-08	2.31901e-05	1.33283e-05
p-Cresol glucuronide	Organic oxygen compounds	4.44999e-05	6.20936e-06	1.79996e-05	1.60211e-05	4.5625e-05	3.21521e-05	4.60832e-05	2.54232e-05	4.00366e-05	1.83014e-05	1.87491e-05	3.79528e-05	3.18946e-05	1.3248e-05	3.59565e-06	3.40918e-05	1.12743e-05	5.19753e-05
Triethanolamine	Organonitrogen compounds	4.30979e-06	2.70713e-06	9.3058e-07	3.39522e-06	2.43564e-06	8.3929e-06	9.40427e-06	5.7715e-06	5.56636e-06	2.2331e-06	2.50173e-06	2.46393e-06	2.70555e-06	4.08052e-07	3.03761e-06	5.48957e-06	3.40543e-06	2.15462e-06
N-gamma-Glutamyl-S-propylcysteine	Organic acids and derivatives	2.91338e-07	4.92226e-07	8.72456e-07	5.18784e-07	1.86493e-06	1.71875e-06	7.40902e-07	3.42041e-06	1.99098e-06	2.71373e-06	4.29032e-06	3.32473e-06	2.93459e-06	1.75475e-06	3.9331e-06	2.13929e-06	2.17625e-06	9.3545e-07
Metenamine	Organoheterocyclic compounds	6.57939e-05	4.86593e-05	0.000131051	9.67189e-05	7.30859e-05	0.000212902	7.32524e-05	7.30973e-05	8.25087e-05	0.000144553	7.60049e-05	9.13571e-05	8.30653e-05	8.05186e-05	7.00761e-05	7.67414e-05	6.55143e-05	7.00411e-05
2-(Formamido)-N1-(5-phospho-D-ribosyl)acetamidine	Organic oxygen compounds	1.02228e-06	4.07076e-06	2.25835e-06	1.6317e-06	3.20519e-06	2.00156e-06	2.36603e-06	3.83037e-06	2.29484e-06	1.54659e-06	2.49595e-06	3.17988e-06	1.62264e-06	2.22165e-06	3.51309e-06	2.28281e-06	2.72885e-06	3.23674e-06
Dimethylethanolamine	Organonitrogen compounds	2.83301e-05	5.59303e-05	4.48742e-05	3.64903e-05	3.32453e-05	4.29827e-05	3.95149e-05	2.99541e-05	1.14139e-05	4.88575e-05	4.33823e-05	2.99417e-05	2.19896e-05	3.25027e-05	2.43232e-05	4.70022e-05	4.4463e-05	4.72128e-05
L-Methionine	Organic acids and derivatives	5.02122e-05	9.32548e-05	7.15596e-05	7.5443e-05	6.37208e-05	2.1549e-05	2.80707e-05	3.43811e-05	4.35475e-05	3.67709e-05	2.8605e-05	2.65762e-05	4.54864e-05	4.79943e-06	9.89275e-05	8.74123e-05	0.000127255	9.71909e-05
Asparaginyl-Hydroxyproline	Organic acids and derivatives	1.85353e-05	3.89371e-05	3.12415e-05	3.31688e-05	2.22491e-05	1.66475e-05	2.05488e-05	2.15457e-05	1.67254e-05	3.1263e-05	2.32242e-05	1.98341e-05	2.45625e-05	3.80216e-05	3.26149e-05	1.65859e-05	3.16868e-05	3.31191e-05
3-Hydroxyisovalerylcarnitine	Lipids and lipid-like molecules	0.00016683	0.000839413	0.000333652	0.000462757	0.00033054	0.000300756	0.000995707	0.000533223	0.00035305	0.000403455	0.00025983	0.000446329	0.000227549	0.000397359	0.000280963	0.000472997	0.000491159	0.000377806
Phenylalanyl-Isoleucine	Organic acids and derivatives	9.90948e-06	0.000125903	3.00396e-05	4.60392e-05	5.38276e-05	5.88283e-05	7.84478e-05	8.63022e-05	3.33995e-05	5.35772e-05	5.51184e-05	0.000142967	5.93194e-05	0.000120051	7.78878e-05	7.43308e-05	4.33276e-05	5.90228e-05
L-prolyl-L-proline	Organic acids and derivatives	7.80634e-06	7.61967e-06	4.76376e-06	2.51482e-06	3.00166e-06	4.53523e-06	3.98841e-06	3.98538e-06	4.41081e-06	4.94576e-06	4.49884e-06	6.33606e-06	5.14107e-06	5.08741e-06	5.47359e-06	8.57942e-06	1.66036e-05	3.04373e-06
N-Cyclopropyl-trans-2-cis-6-nonadienamide	Lipids and lipid-like molecules	5.57593e-05	4.34551e-05	5.38292e-05	5.42169e-05	5.29286e-05	5.86069e-05	6.32243e-05	4.73437e-05	5.70325e-05	5.71336e-05	4.6855e-05	5.1287e-05	5.38124e-05	5.04502e-05	4.74019e-05	5.35849e-05	5.3019e-05	5.55236e-05
Octadecanamide	Lipids and lipid-like molecules	5.25491e-06	8.13662e-06	4.99216e-06	5.81987e-06	1.39949e-05	1.16726e-05	9.51076e-06	7.06254e-06	9.85719e-06	6.22807e-06	7.87458e-06	7.33036e-06	1.2156e-05	5.4456e-06	6.06457e-06	1.40879e-05	4.69194e-06	7.55669e-06
Stigmasterol	Lipids and lipid-like molecules	4.27341e-06	2.63528e-06	3.45995e-06	3.82411e-06	2.42063e-06	4.04558e-06	2.55965e-06	9.4421e-07	1.64864e-06	2.44364e-06	4.22434e-06	1.61881e-06	7.74481e-07	1.8191e-06	2.7263e-06	1.57069e-06	2.64142e-06	3.42816e-06
Piperidine	Organoheterocyclic compounds	0.000973594	0.000330866	0.000593307	0.000416654	0.000268724	0.000244513	0.000317105	0.000343246	0.000376194	0.000238943	0.000469044	0.000265768	0.000275584	0.000260405	0.000433416	0.000408012	0.000897937	0.000275452
5-(2-Hydroxyethyl)-4-methylthiazole	Organoheterocyclic compounds	7.9923e-05	1.56858e-05	2.15033e-05	1.99001e-08	2.36814e-06	1.90791e-08	2.08501e-06	6.39567e-06	7.49741e-05	4.27751e-06	3.59612e-06	2.51394e-05	3.17422e-06	1.87597e-05	7.26353e-05	2.34034e-05	8.26591e-05	1.39572e-05
Prolyl-Arginine	Organic acids and derivatives	1.11368e-06	2.77744e-06	1.1316e-06	1.24092e-06	1.27942e-06	1.19822e-06	1.53273e-06	1.78637e-06	1.67902e-06	1.17232e-06	1.90886e-06	2.36274e-06	2.13031e-06	1.59664e-06	1.59983e-06	1.80384e-06	1.60721e-06	1.53376e-06
Palmitoylethanolamide	Organic acids and derivatives	0.00017139	0.000177699	0.000171909	8.38081e-05	7.73058e-05	0.00015429	0.000105253	8.60308e-05	0.000116702	0.000137534	7.68326e-05	9.60117e-05	0.000113359	0.000110456	0.000150418	0.000131934	0.000206145	8.37448e-05
L-cis-3-Amino-2-pyrrolidinecarboxylic acid	Organic acids and derivatives	1.28559e-05	9.57706e-06	1.24208e-05	9.01906e-06	1.87109e-05	1.56904e-05	1.69188e-05	2.81353e-05	1.0848e-05	1.44266e-05	1.18472e-05	2.05577e-05	1.43287e-05	1.55016e-05	1.33229e-05	1.65416e-05	3.39404e-06	1.38269e-05
FAD	Nucleosides, nucleotides, and analogues	2.3086e-05	3.27399e-05	2.72595e-05	3.40139e-05	3.55368e-05	4.14428e-05	3.65706e-05	3.76867e-05	3.42264e-05	4.38193e-05	4.83924e-05	4.10214e-05	2.99999e-05	3.47497e-05	4.32295e-05	2.16586e-05	3.48566e-05	3.71513e-05
Phenylalanyl-Alanine	Organic acids and derivatives	4.09537e-06	9.63645e-06	4.86725e-06	2.57244e-06	3.95416e-06	3.72692e-06	6.52312e-06	5.27845e-06	2.82366e-06	5.15945e-06	3.22871e-06	5.74273e-06	1.57845e-06	6.03685e-06	1.03137e-05	8.74787e-06	5.53041e-06	4.40161e-06
Zymonic acid	Organoheterocyclic compounds	0.000146361	5.42237e-05	0.000178974	7.1211e-05	0.000197349	6.58865e-05	0.000102846	0.000137525	0.000229311	9.29512e-05	6.44706e-05	9.7667e-05	5.18406e-05	7.55174e-05	0.0001042	0.000105778	8.08133e-05	9.6206e-05
LysoPE(0:0/20:4(5Z,8Z,11Z,14Z))	Lipids and lipid-like molecules	0.000237723	6.02429e-05	7.3605e-05	2.92419e-05	6.76597e-05	6.19464e-05	4.96439e-05	0.000163135	0.000257912	8.34439e-05	5.71071e-05	0.00017632	8.18674e-05	9.21111e-05	0.000233955	0.00013417	0.000297833	0.000120197
L-Coprine	Organic acids and derivatives	4.43728e-06	5.59478e-06	4.38602e-06	4.02472e-06	4.22653e-06	3.03648e-06	3.05963e-06	2.16624e-06	3.41163e-06	2.83821e-06	4.06717e-06	3.43191e-06	2.73929e-06	3.51215e-06	4.13634e-06	5.57681e-06	4.93194e-06	3.9499e-06
Phenylalanyl-Tryptophan	Organic acids and derivatives	1.65682e-06	3.32404e-06	1.73709e-06	2.98425e-06	4.93643e-06	4.97354e-06	3.2424e-06	6.98418e-06	2.00373e-06	4.02371e-06	1.94764e-06	7.77437e-06	2.58479e-06	6.36622e-06	4.01398e-06	4.53596e-06	2.23512e-06	2.94331e-06
Pisumionoside	Lipids and lipid-like molecules	2.92673e-05	6.40357e-06	4.82837e-06	2.05509e-06	5.83428e-06	3.75076e-06	2.30342e-06	2.73351e-06	3.78122e-06	2.41245e-06	2.87225e-06	1.27803e-06	7.98438e-07	4.5275e-06	3.30278e-06	1.12359e-05	9.77649e-06	3.91992e-06
Dihydrouracil	Organoheterocyclic compounds	8.34058e-06	6.74332e-07	1.98904e-08	4.5933e-06	1.16257e-05	9.02808e-06	1.90659e-05	1.09429e-05	6.92966e-06	2.67614e-06	2.53437e-06	1.40212e-05	9.04387e-06	6.80848e-06	1.46015e-06	2.35192e-06	1.88486e-08	7.47448e-06
Glutaminylalanine	Organic acids and derivatives	1.37945e-06	1.98475e-06	5.58677e-07	1.10022e-06	1.97815e-06	2.80446e-06	2.154e-06	2.39432e-06	1.93733e-06	2.33157e-06	3.87598e-06	2.13278e-06	2.94643e-06	3.1673e-06	2.1003e-06	3.48666e-06	3.04927e-06	3.15712e-06
N-Oleoylethanolamine	Organic nitrogen compounds	3.37489e-05	1.98663e-05	1.92177e-05	1.98621e-05	2.00592e-05	2.71539e-05	1.70901e-05	2.44957e-05	2.28051e-05	2.72367e-05	3.13584e-05	3.87168e-05	2.72534e-05	2.43972e-05	1.95462e-05	2.514e-05	2.76293e-05	3.1313e-05
Homocysteine thiolactone	Organic acids and derivatives	2.24089e-05	2.31157e-05	3.77115e-05	7.87933e-05	8.38205e-05	1.31465e-05	2.56008e-05	2.86838e-05	6.65673e-05	1.9424e-05	2.56044e-05	2.2674e-05	3.76513e-05	1.51499e-05	1.83641e-05	2.7891e-05	1.88621e-05	3.51289e-05
Valyl-Valine	Organic acids and derivatives	4.77281e-06	1.68376e-05	6.24693e-06	7.24566e-06	7.31811e-06	6.97013e-06	5.75219e-06	4.46829e-06	5.1538e-06	8.01448e-06	2.94548e-06	8.26753e-06	3.73283e-06	5.61583e-06	1.18792e-05	9.6581e-06	7.19859e-06	9.23233e-06
Leonuriside A	Organic oxygen compounds	2.11241e-05	2.06966e-05	1.98729e-05	3.64838e-05	2.12056e-05	2.09418e-05	2.45646e-05	2.21533e-05	2.1208e-05	2.17469e-05	2.07167e-05	2.74203e-05	2.83762e-05	2.39258e-05	1.80181e-05	2.02045e-05	1.47532e-05	2.13996e-05
Mannose 6-phosphate	Organic oxygen compounds	3.50752e-06	1.8172e-05	1.45774e-05	1.07362e-05	5.52371e-06	4.39203e-05	5.06391e-06	8.87824e-06	2.00929e-05	5.0599e-05	1.81587e-05	4.32159e-05	2.00989e-05	3.94926e-05	3.36069e-05	9.34108e-06	3.06987e-05	2.27845e-05
Methylimidazole acetaldehyde	Organoheterocyclic compounds	5.00075e-05	6.68001e-05	4.99562e-05	7.49978e-05	6.33892e-05	6.5718e-05	6.35118e-05	6.45809e-05	5.8932e-05	6.25963e-05	7.58492e-05	6.37637e-05	5.66095e-05	5.73084e-05	7.40976e-05	0.000127212	0.000100732	7.69623e-05
N-Acetylhistidine	Organic acids and derivatives	4.98949e-06	3.8875e-06	4.25116e-06	4.19182e-06	4.73023e-06	8.97588e-06	4.18697e-06	6.12322e-06	3.33052e-06	5.79137e-06	4.74696e-06	5.23795e-06	3.64451e-06	4.58323e-06	4.99405e-05	3.81001e-06	3.25661e-06	3.43183e-06
6-Phosphonoglucono-D-lactone	Organic oxygen compounds	9.0643e-07	6.64186e-06	5.49887e-06	3.25531e-06	1.16524e-06	1.48052e-05	1.30071e-06	2.03622e-06	7.92665e-06	1.73939e-05	6.02181e-06	1.56432e-05	6.86057e-06	1.35035e-05	1.39676e-05	2.62782e-06	1.18268e-05	1.04048e-05
N1-Methyl-4-pyridone-3-carboxamide	Organoheterocyclic compounds	2.45538e-05	1.2922e-05	1.68244e-05	1.29314e-05	2.03432e-05	1.30825e-05	6.50643e-06	1.92517e-05	2.06278e-05	1.43115e-05	7.55751e-06	1.10675e-05	1.26398e-05	1.76899e-05	1.47848e-05	2.04163e-05	8.48662e-06	5.53811e-05
DL-2-Aminooctanoic acid	Organic acids and derivatives	1.92268e-05	1.89622e-05	1.30799e-05	1.53886e-05	1.87438e-05	3.14706e-05	2.19491e-05	2.07991e-05	1.65048e-05	1.3578e-05	2.29647e-05	1.49717e-05	1.64397e-05	2.10974e-05	2.06473e-05	2.23545e-05	1.56487e-05	2.39621e-05
gamma-Glutamylleucine	Organic acids and derivatives	5.97669e-06	6.59248e-06	7.45548e-06	8.62931e-06	7.54436e-06	6.76736e-06	1.07218e-05	8.59437e-06	7.14002e-06	1.11012e-05	9.2646e-06	9.9961e-06	9.00652e-06	9.20485e-06	9.23258e-06	5.55257e-06	8.0606e-06	8.50193e-06
Aspartyl-Leucine	Organic acids and derivatives	1.54299e-05	1.38141e-05	1.76936e-05	2.44903e-05	2.17551e-05	1.75845e-05	1.82229e-05	1.75061e-05	1.87718e-05	1.97199e-05	2.07755e-05	2.35762e-05	1.92267e-05	1.6818e-05	1.90986e-05	1.24648e-05	1.80368e-05	1.9218e-05
Arecaidine	Alkaloids and derivatives	8.08665e-05	9.42115e-05	7.92026e-05	9.90607e-05	9.5826e-05	0.000143562	0.000107694	0.000101377	9.33574e-05	0.000100733	8.79936e-05	0.000101572	9.32849e-05	9.3371e-05	9.33943e-05	8.42065e-05	9.43807e-05	9.57336e-05
Glycerophosphocholine	Lipids and lipid-like molecules	2.96911e-05	0.000374869	0.000178222	0.000247834	0.000345168	0.000316524	0.000232095	0.000239818	0.000133879	0.000347078	0.000420218	0.000153127	0.000268686	0.000149279	0.000228491	0.000301975	9.37172e-05	0.000159943
Homo-L-arginine	Organic acids and derivatives	6.80179e-05	5.42177e-05	3.23546e-05	2.90451e-05	2.03555e-05	2.79385e-05	5.31504e-05	3.74911e-05	4.19541e-05	2.59297e-05	2.77532e-05	3.18328e-05	2.15164e-05	3.13735e-05	4.98564e-05	2.59208e-05	3.34047e-05	2.37229e-05
Prolylphenylalanine	Organic acids and derivatives	9.91535e-06	5.90285e-06	4.82494e-06	3.16198e-06	2.9216e-06	3.40424e-06	1.59011e-06	2.22297e-06	4.82128e-06	4.08582e-06	2.62088e-06	2.3992e-06	2.54435e-06	2.62014e-06	8.62278e-06	7.44237e-06	1.90889e-05	2.47495e-06
7-Ketocholesterol	Lipids and lipid-like molecules	3.92043e-06	3.86814e-06	4.84754e-06	5.9177e-06	4.41949e-06	5.67102e-06	1.17943e-05	5.7877e-06	5.8608e-06	3.24685e-06	4.19949e-06	4.29018e-06	6.673e-06	3.29531e-06	4.44642e-06	8.18293e-06	2.93181e-06	3.11084e-06
Valyl-Lysine	Organic acids and derivatives	0.00155682	0.00180045	0.0019895	0.00207645	0.00202246	0.00236715	0.00237906	0.00195638	0.00176262	0.002168	0.00211682	0.00200517	0.00185231	0.00187193	0.00202577	0.00166248	0.00197854	0.00181588
Arsenobetaine	Organometallic compounds	4.99067e-06	1.00832e-05	5.51265e-06	5.37162e-06	7.68207e-06	9.184e-06	6.0664e-06	6.86644e-06	8.54868e-06	2.17696e-06	4.03572e-06	2.05588e-06	4.293e-06	3.23019e-06	9.71988e-06	1.02396e-05	3.98499e-06	7.04779e-06
5-Hydroxyconiferyl alcohol	Benzenoids	6.43443e-05	0.000171254	0.000329887	0.000141448	5.68347e-05	5.1291e-05	3.76262e-05	3.76499e-05	5.64776e-05	7.14735e-05	4.99052e-05	2.06228e-05	3.07963e-05	3.80932e-05	9.67168e-05	2.16808e-05	0.000130036	3.44104e-05
Methionyl-Valine	Organic acids and derivatives	1.81845e-08	8.58932e-06	1.57462e-06	3.16628e-06	2.24729e-06	2.30326e-06	2.47332e-06	4.21846e-06	5.89264e-07	3.58669e-06	2.94171e-06	7.86545e-06	2.67731e-06	4.84218e-06	2.96791e-06	3.06222e-06	1.45078e-06	5.3563e-06
SM(d18:1/16:0)	Lipids and lipid-like molecules	0.000247167	0.00019094	0.000103645	0.000254544	0.00024076	0.000252488	0.00028796	0.000206237	0.000201661	0.000158709	0.000179174	0.00022247	0.000206876	0.00024588	0.000113334	0.000232423	0.000113789	0.000254343
Adenosine diphosphate ribose	Nucleosides, nucleotides, and analogues	1.36616e-06	0.000152953	7.95774e-05	0.000111177	0.00012425	0.000149063	0.000112141	0.000117605	7.11411e-05	0.000190858	0.000149003	0.00017598	9.35919e-05	0.000113111	9.75895e-05	5.40145e-05	4.10487e-05	0.000127496
Butyrylcarnitine	Lipids and lipid-like molecules	3.78465e-05	5.60527e-05	6.11927e-05	0.00107528	0.000625436	0.000983489	0.00129138	9.87336e-05	0.000512982	0.000974434	0.00171935	0.000925414	0.00142408	0.00120865	0.00057172	0.000102105	0.000114317	0.00126249
2-Pyrrolidineacetic acid	Organoheterocyclic compounds	2.85264e-05	2.34943e-05	5.7027e-05	1.57297e-05	3.5794e-05	8.35281e-05	2.71683e-05	1.84602e-05	2.56542e-05	6.26599e-05	1.14859e-05	4.10194e-05	4.01676e-05	3.1122e-05	3.68636e-05	3.10398e-05	4.51903e-05	2.90252e-05
6-Hydroxy-1H-indole-3-acetamide	Organoheterocyclic compounds	8.25691e-06	1.25784e-05	1.06783e-05	1.02488e-05	1.62636e-05	1.60705e-05	9.11317e-06	8.53029e-06	1.86857e-05	1.02501e-05	6.45402e-06	8.2832e-06	9.10768e-06	9.59179e-06	7.91573e-06	1.7465e-05	8.85149e-06	1.19019e-05
1,9-Nonanedithiol	Organosulfur compounds	2.34519e-06	1.10459e-05	2.0455e-06	1.0988e-05	9.1217e-06	7.41577e-07	6.34986e-06	5.16566e-06	2.45811e-06	8.52646e-06	7.45528e-06	9.31193e-06	1.34562e-05	6.50215e-06	3.20156e-06	5.67019e-06	2.95651e-06	8.03964e-06
D-4'-Phosphopantothenate	Organic acids and derivatives	9.68922e-05	1.37318e-05	2.75111e-05	8.98691e-06	1.82468e-05	1.34047e-05	1.26144e-05	2.74994e-05	5.33165e-05	1.40883e-05	1.11422e-05	2.02173e-05	3.92774e-06	2.14521e-05	4.96608e-05	2.45276e-05	7.84566e-05	1.2895e-05
Isoleucyl-Histidine	Organic acids and derivatives	7.55509e-06	9.25963e-06	7.82942e-06	1.82911e-06	3.46049e-06	5.2786e-06	6.76664e-06	6.83845e-06	8.22616e-06	4.77187e-06	3.17925e-06	9.33138e-06	2.47233e-06	1.02553e-05	1.41358e-05	1.43859e-05	1.55066e-05	4.90938e-06
Acrylamide	Organic acids and derivatives	1.09292e-05	1.81555e-05	1.8503e-05	1.97729e-05	2.04756e-05	2.08791e-05	1.47175e-05	1.51399e-05	1.84034e-05	2.33096e-05	2.27907e-05	2.55589e-05	1.52462e-05	2.82614e-05	2.01744e-05	1.89445e-05	2.14086e-05	1.7539e-05
UDP-N-acetyl-alpha-D-galactosamine	Nucleosides, nucleotides, and analogues	2.54552e-06	6.36156e-06	5.28954e-06	7.81743e-06	7.24571e-06	8.32042e-06	4.60116e-06	4.84954e-06	4.97982e-06	6.13409e-06	5.39088e-06	5.90783e-06	4.80356e-06	5.8565e-06	5.18061e-06	5.75827e-06	5.09574e-06	5.14701e-06
Polyoxyethylene (600) monoricinoleate	Lipids and lipid-like molecules	0.000125706	6.54454e-05	4.97246e-05	2.98847e-05	4.09183e-05	1.79219e-05	2.31588e-05	3.68924e-05	6.13903e-05	1.88117e-05	2.02572e-05	1.52672e-05	1.79043e-05	2.84817e-05	6.17063e-05	5.31273e-05	0.000136826	3.23585e-05
Thialdine	Organoheterocyclic compounds	9.69832e-06	8.43251e-06	1.08916e-05	9.96195e-06	1.31544e-05	1.2478e-05	8.58717e-06	1.21679e-05	1.13692e-05	1.34036e-05	7.49865e-06	9.54485e-06	8.04124e-06	5.26816e-06	7.48968e-06	7.63759e-06	9.28335e-06	9.45721e-06
5-Aminopentanamide	Organic acids and derivatives	4.25463e-05	4.49341e-05	3.39266e-05	3.64487e-05	3.37906e-05	3.95135e-05	3.20806e-05	3.9858e-05	3.76488e-05	4.36295e-05	3.62232e-05	3.74699e-05	3.45861e-05	3.80046e-05	3.94954e-05	4.1295e-05	3.54499e-05	3.45226e-05
L-Lysine	Organic acids and derivatives	0.000234871	0.000379046	0.000296808	0.000198601	0.000175043	0.000221116	0.000274313	0.000200978	0.00030331	0.000334093	0.00035088	0.000329967	0.000233586	0.000261706	0.000558861	0.000262731	0.000354893	0.000148105
Squamolone	Organoheterocyclic compounds	2.4261e-05	2.76453e-05	2.4919e-05	2.75163e-05	2.69166e-05	2.59611e-05	3.53589e-05	3.06203e-05	2.95465e-05	3.01631e-05	2.4344e-05	2.7767e-05	2.8476e-05	2.81832e-05	3.07666e-05	2.64591e-05	2.5376e-05	2.65361e-05
2-Piperidinone	Organoheterocyclic compounds	1.73121e-05	1.97391e-05	1.93633e-05	2.64816e-05	2.81866e-05	3.40671e-05	2.50761e-05	1.89763e-05	1.81026e-05	2.08929e-05	1.77347e-05	1.99563e-05	1.97886e-05	1.91908e-05	1.8851e-05	1.72485e-05	1.92608e-05	1.91994e-05
Linoleamide	Lipids and lipid-like molecules	0.000122037	5.11874e-05	5.4442e-05	2.33021e-05	3.35277e-05	5.13832e-05	1.86206e-05	3.84694e-05	5.80709e-05	4.41421e-05	3.42944e-05	6.36175e-05	4.49225e-05	5.12174e-05	6.11843e-05	5.50142e-05	8.23037e-05	3.95225e-05
Deoxyinosine	Nucleosides, nucleotides, and analogues	1.19654e-05	6.99888e-06	7.08621e-06	4.68596e-06	9.43434e-06	6.6632e-06	3.62285e-06	7.1941e-06	1.052e-05	6.07789e-06	4.64731e-06	7.10783e-06	6.05546e-06	7.50386e-06	8.96071e-06	6.86081e-06	9.01677e-06	6.73482e-06
alpha-Methylstyrene	Benzenoids	4.22668e-05	5.20098e-05	5.16797e-05	4.88952e-05	4.79883e-05	3.15235e-05	5.04323e-05	3.93783e-05	3.91288e-05	3.64998e-05	4.0572e-05	5.85769e-05	3.49629e-05	3.98774e-05	3.6705e-05	5.97479e-05	6.74616e-05	4.56763e-05
Gonyautoxin IV	Phenylpropanoids and polyketides	2.56321e-06	2.65232e-06	6.42265e-06	2.24885e-06	4.24791e-06	3.94087e-06	2.6375e-06	5.07815e-06	6.95016e-06	3.41937e-06	2.41078e-06	4.31584e-06	1.27742e-06	4.70223e-06	5.91627e-06	3.59009e-06	5.80369e-06	2.72158e-06
cis-5-Tetradecenoylcarnitine	Lipids and lipid-like molecules	2.72453e-05	1.43636e-05	2.52054e-05	0.000168851	7.84048e-05	0.000914681	0.000407308	0.000142759	0.000317121	0.00033658	0.00159583	0.000248503	0.000171909	0.000614394	6.9287e-05	0.000100014	5.77841e-05	0.000213146
Leucyl-Cysteine	Organic acids and derivatives	1.81845e-08	8.21483e-06	1.98904e-08	5.01598e-06	3.99638e-06	4.43423e-06	4.0266e-06	6.00441e-06	3.85071e-07	3.74869e-06	6.01965e-06	1.91698e-05	7.20294e-06	5.96364e-06	3.59084e-06	2.3708e-06	1.88486e-08	5.61859e-06
Hippuric acid	Benzenoids	2.80177e-05	2.14654e-05	1.55456e-05	2.34947e-05	8.96148e-06	1.46967e-05	8.04364e-06	2.11192e-05	8.15475e-06	8.72978e-06	1.61737e-05	2.34067e-05	3.64618e-06	1.67848e-05	6.71394e-06	6.02767e-06	1.35478e-05	1.5275e-05
beta-D-Glucosamine	Organooxygen compounds	1.51511e-05	1.43061e-05	1.83711e-05	4.86748e-06	1.34247e-05	1.49532e-05	1.0109e-05	1.98904e-05	1.3252e-05	1.77634e-05	1.21432e-05	1.38001e-05	1.95328e-06	1.46542e-05	2.32202e-05	1.81744e-05	2.16801e-05	1.28309e-05
2-Pyrrolidinone	Organoheterocyclic compounds	6.20333e-05	2.66157e-05	2.41123e-05	1.21587e-05	2.55455e-05	1.37528e-05	9.57644e-06	2.44674e-05	5.85158e-05	2.17211e-05	1.49477e-05	2.20143e-05	2.59417e-05	2.33536e-05	3.20383e-05	3.69667e-05	3.22719e-05	4.16647e-05
3-Hydroxy-N6,N6,N6-trimethyl-L-lysine	Organic acids and derivatives	5.19304e-06	9.66142e-06	9.83809e-06	9.44535e-06	9.87909e-06	1.47122e-05	1.01785e-05	1.08994e-05	1.96561e-05	1.50127e-05	1.06203e-05	1.22807e-05	8.8944e-06	9.72955e-06	1.21816e-05	6.78969e-06	1.1578e-05	8.56608e-06
LysoPE(0:0/18:0)	Lipids and lipid-like molecules	0.00220508	0.000422634	0.000587632	0.000212252	0.000397592	0.000306104	0.000308185	0.00075506	0.00159505	0.000374333	0.000321456	0.000468981	0.000268386	0.000568903	0.00147567	0.00106948	0.00302277	0.000678773
N-Acetylornithine	Organic acids and derivatives	7.84742e-07	1.41801e-06	1.18664e-06	1.70374e-06	1.49484e-06	4.0312e-06	2.53552e-06	5.18217e-06	6.38035e-06	7.89806e-06	2.97227e-06	3.26754e-06	7.91521e-06	2.76193e-06	2.75334e-06	3.5344e-06	2.46912e-06	1.07407e-05
Methylimidazoleacetic acid	Organoheterocyclic compounds	2.46118e-05	2.01158e-05	3.28543e-05	1.98438e-05	1.96822e-05	3.34646e-05	2.36018e-05	2.08927e-05	2.73553e-05	2.21496e-05	1.95775e-05	1.96769e-05	1.8294e-05	2.48191e-05	2.72819e-05	5.32132e-05	2.65018e-05	2.41707e-05
AICA-riboside	Nucleosides, nucleotides, and analogues	9.86727e-06	8.01869e-06	8.53486e-07	3.08566e-06	2.83014e-06	1.41994e-05	1.71826e-05	8.573e-06	3.81762e-06	8.83867e-06	7.67614e-06	7.43319e-06	8.64443e-06	6.86533e-06	1.22958e-06	1.30785e-06	4.00303e-06	7.03694e-06
Alanyl-Threonine	Organic acids and derivatives	6.21815e-06	5.04527e-05	3.55006e-05	3.39393e-05	3.8236e-05	4.49608e-05	4.28534e-05	4.64655e-05	2.15406e-05	4.52194e-05	4.48023e-05	4.94929e-05	3.03366e-05	4.49059e-05	4.17493e-05	3.92172e-05	3.66114e-05	3.56028e-05
Decanoylcarnitine	Lipids and lipid-like molecules	2.89611e-06	2.09835e-06	3.74706e-06	0.000104909	5.27736e-05	0.000207607	0.00023256	9.95315e-05	9.72854e-05	0.000225352	0.000369813	0.000126827	9.30012e-05	0.000160254	3.88936e-05	5.16731e-05	1.52632e-05	0.000106972
PC(22:6(4Z,7Z,10Z,13Z,16Z,19Z)/20:0)	Lipids and lipid-like molecules	5.7241e-05	0.000104621	9.81291e-05	6.48171e-05	5.70956e-05	5.97975e-05	2.81855e-05	3.74664e-05	5.66066e-05	4.9161e-05	3.81549e-05	4.75569e-05	3.42321e-05	4.14352e-05	6.05025e-05	5.6346e-05	6.43043e-05	4.48774e-05
Coenzyme Q9	Lipids and lipid-like molecules	3.53995e-05	0.000102126	0.000180395	6.58067e-05	2.38578e-05	2.34612e-05	1.51854e-05	1.68946e-05	2.95055e-05	3.54648e-05	2.19585e-05	6.47765e-06	1.55034e-05	1.69381e-05	4.76027e-05	1.13869e-05	8.01608e-05	1.53695e-05
4-(4-chlorophenyl)-4-hydroxypiperidine	Organoheterocyclic compounds	1.34596e-06	1.95148e-06	5.19202e-07	1.79181e-06	2.01111e-06	4.92034e-07	1.76168e-08	5.06554e-07	2.99935e-07	8.0505e-07	1.75738e-08	9.08384e-07	2.1944e-06	8.33597e-07	9.11361e-07	2.72259e-06	1.57832e-06	8.02517e-07
Arginyl-Valine	Organic acids and derivatives	5.34221e-06	8.34363e-06	8.70321e-06	3.01048e-06	5.51554e-06	4.43434e-06	5.61247e-06	6.23806e-06	4.87448e-06	4.3784e-06	3.60913e-06	5.74578e-06	3.1293e-06	5.94952e-06	8.03579e-06	8.60105e-06	2.97164e-06	3.72971e-06
Imidazole-4-acetaldehyde	Organoheterocyclic compounds	8.85646e-05	5.26064e-05	9.29648e-05	4.95224e-05	8.49366e-05	8.65195e-05	8.37771e-05	8.28279e-05	7.7172e-05	8.99714e-05	7.72814e-05	9.82433e-05	0.00010477	1.39802e-05	6.62701e-06	8.42602e-05	9.5102e-05	9.24577e-05
Deoxyuridine	Nucleosides, nucleotides, and analogues	9.53786e-06	5.34943e-05	2.33493e-05	3.82358e-05	2.78678e-05	3.19322e-05	2.22472e-05	2.74305e-05	3.74602e-05	5.73377e-05	3.95662e-05	3.92445e-05	3.34692e-05	3.87306e-05	3.463e-05	1.95514e-05	2.41179e-05	2.95164e-05
6-Chloro-N-(1-methylethyl)-1,3,5-triazine-2,4-diamine	Organoheterocyclic compounds	0.000102471	7.03559e-05	5.39026e-05	5.01429e-05	7.12742e-05	6.67852e-05	7.32609e-05	6.59508e-05	6.56587e-05	7.018e-05	6.56632e-05	5.52906e-05	6.76097e-05	4.96653e-05	7.93058e-05	4.45782e-05	7.98831e-05	6.80747e-05
Miltirone	Lipids and lipid-like molecules	1.81845e-08	4.1866e-06	1.98904e-08	3.84608e-05	1.85554e-08	2.65054e-05	1.4041e-05	1.60252e-06	1.8803e-08	1.99954e-08	4.82982e-06	1.93056e-08	1.99052e-08	1.88971e-08	1.02484e-05	1.05202e-05	4.78581e-06	1.84034e-08
1-Arachidonoylglycerophosphoinositol	Lipids and lipid-like molecules	5.17874e-05	1.4101e-05	1.31914e-05	7.14555e-06	1.21896e-05	5.7253e-06	7.04301e-06	1.57648e-05	2.3056e-05	7.23304e-06	5.45284e-06	1.23577e-05	6.65058e-06	9.04373e-06	2.29975e-05	1.46788e-05	4.33845e-05	1.15771e-05
Arachidyl carnitine	Lipids and lipid-like molecules	1.95408e-05	1.62253e-05	9.77935e-06	4.92006e-05	4.7857e-05	0.000249662	0.00030281	4.64208e-05	6.66888e-05	8.43673e-05	0.000213963	0.000124632	0.000121691	0.000135922	1.80426e-05	3.51555e-05	4.21643e-05	0.000218298
Methionyl-Phenylalanine	Organic acids and derivatives	1.81845e-08	9.53805e-06	7.42928e-07	2.52297e-06	3.33649e-06	3.5219e-06	3.99914e-06	5.48065e-06	1.11086e-06	4.92662e-06	2.59577e-06	1.5543e-05	2.67092e-06	6.55659e-06	3.46263e-06	4.46639e-06	5.86381e-07	2.43576e-06
Methoxypyrazine	Organoheterocyclic compounds	8.5845e-05	0.000113241	7.56547e-05	0.000133188	9.2332e-05	8.10537e-05	7.75355e-05	9.02189e-05	7.19629e-05	9.0697e-05	7.61821e-05	9.56612e-05	0.000126047	9.57701e-05	6.98821e-05	8.06069e-05	7.61265e-05	9.48368e-05
SM(d18:1/24:1(15Z))	Lipids and lipid-like molecules	9.25406e-05	0.000211119	0.000258919	0.000139261	6.44467e-05	0.000112694	5.7784e-05	4.98333e-05	8.01293e-05	0.000207638	8.34841e-05	5.69688e-05	7.49309e-05	8.8611e-05	0.000144809	0.000174327	0.000189963	9.10922e-05
Succinyladenosine	Nucleosides, nucleotides, and analogues	5.9879e-05	4.97236e-05	3.57556e-05	3.37039e-05	5.15599e-05	4.18168e-05	3.54931e-05	7.24116e-05	7.11318e-05	4.32539e-05	4.45442e-05	6.12252e-05	3.41032e-05	3.46121e-05	4.9817e-05	3.231e-05	8.70938e-05	4.45687e-05
Leucyl-Lysine	Organic acids and derivatives	6.01815e-06	5.64317e-06	7.28382e-06	7.35037e-06	8.8221e-06	3.02664e-05	2.1292e-05	9.78441e-06	9.17447e-06	1.65249e-05	1.41543e-05	8.12144e-06	5.43748e-06	1.2833e-05	8.86395e-06	8.81583e-06	1.09031e-05	5.99201e-06
Arginyl-Gamma-glutamate	Organic acids and derivatives	1.48468e-06	9.29808e-06	1.09639e-06	2.59625e-06	4.4123e-06	6.29033e-06	4.94702e-06	9.67255e-06	4.23131e-06	8.14057e-06	1.14961e-06	1.17307e-05	7.91691e-06	6.70945e-06	7.41477e-06	7.90964e-06	7.87206e-06	5.6587e-06
Arborinine	Organoheterocyclic compounds	6.95039e-05	2.24506e-05	2.61578e-05	1.37941e-05	2.99802e-05	0.000111776	5.64995e-05	4.7936e-05	6.33141e-05	9.33091e-05	7.92258e-05	7.22144e-05	0.000176059	8.93235e-05	3.84788e-05	3.91451e-05	4.29331e-05	3.68294e-05
Alanyl-Leucine	Organic acids and derivatives	7.65266e-06	0.000112401	4.95001e-05	1.59544e-05	2.54672e-05	3.76221e-05	2.99997e-05	5.32963e-05	2.01691e-05	4.76484e-05	3.24134e-05	5.89099e-05	1.99671e-05	5.35631e-05	7.15461e-05	5.67757e-05	7.84547e-05	2.96844e-05
Linoleyl carnitine	Lipids and lipid-like molecules	2.23454e-05	8.85233e-06	8.15248e-06	9.02863e-05	3.07437e-05	0.000474949	0.000430457	6.60807e-05	0.000171531	0.000149381	0.00105393	0.000174718	0.000123383	0.000522922	2.61995e-05	5.87876e-05	3.8025e-05	0.000198988
O-Phosphoethanolamine	Organic acids and derivatives	0.000153207	0.000125363	8.38254e-05	9.95716e-05	9.48778e-05	0.000129636	0.000100283	9.92665e-05	7.56334e-05	0.000103018	0.000107682	7.89744e-05	6.3513e-05	9.53104e-05	8.99283e-05	0.000115327	0.000106817	0.000119906
Stearoylcarnitine	Lipids and lipid-like molecules	0.000157717	0.0002404	0.000201572	0.000721476	0.000359393	0.00249716	0.00198571	0.000511954	0.000610574	0.000744827	0.00311287	0.000873239	0.000511429	0.00184333	0.000399856	0.000395936	0.00033419	0.00163987
N-Nitroso-pyrrolidine	Organoheterocyclic compounds	3.29442e-05	3.16895e-05	3.71026e-05	3.50001e-05	3.05124e-05	3.92611e-05	4.32651e-05	2.79439e-05	3.30535e-05	3.69176e-05	2.47404e-05	3.42332e-05	3.66705e-05	3.63226e-05	3.36481e-05	3.47944e-05	3.24588e-05	3.5436e-05
DG(22:5(7Z,10Z,13Z,16Z,19Z)/16:0/0:0)	Lipids and lipid-like molecules	8.29553e-07	8.78383e-07	8.42556e-07	8.43731e-07	7.16252e-07	8.60784e-07	7.77247e-07	7.28383e-07	8.18143e-07	9.14514e-07	7.23405e-07	8.3736e-07	7.54137e-07	7.77253e-07	6.3915e-07	8.5937e-07	7.47676e-07	7.74319e-07
Histidinyl-Valine	Organic acids and derivatives	1.20204e-05	1.14114e-05	1.07456e-05	3.80031e-06	6.3147e-06	5.30766e-06	6.99931e-06	6.97578e-06	7.65946e-06	4.38115e-06	4.53962e-06	6.309e-06	1.71061e-06	7.81762e-06	1.19711e-05	1.39057e-05	2.68066e-05	6.21589e-06
Histidinal	Organic nitrogen compounds	5.96004e-05	2.04191e-08	1.98904e-08	3.26826e-05	3.84247e-05	3.62871e-05	0.000127192	3.56978e-05	4.08483e-05	7.61168e-06	8.62049e-06	3.18367e-05	2.33869e-05	2.30262e-05	3.56711e-06	8.93749e-06	1.88486e-08	3.52324e-05
2,5-Dichloro-carboxymethylenebut-2-en-4-olide	Organoheterocyclic compounds	1.96499e-05	2.22842e-05	2.0539e-05	2.00556e-05	1.87066e-05	2.0027e-05	2.02748e-05	1.73002e-05	2.03931e-05	2.12532e-05	1.8065e-05	1.93401e-05	2.11798e-05	1.2423e-05	2.07742e-05	2.31695e-05	2.17621e-05	1.95773e-05
PC(20:4(8Z,11Z,14Z,17Z)/P-18:0)	Lipids and lipid-like molecules	4.31444e-05	5.59393e-05	5.64461e-05	3.90943e-05	4.52759e-05	6.64533e-05	3.74768e-05	8.32698e-05	0.000108125	0.000102213	4.26086e-05	9.02645e-05	8.41823e-05	6.68404e-05	8.92979e-05	8.18117e-05	8.13748e-05	7.56996e-05
p-Mentha-1,3,8-triene	Lipids and lipid-like molecules	1.06537e-05	1.37985e-05	2.12105e-05	1.43554e-05	1.0473e-05	9.11377e-06	1.02604e-05	8.46903e-06	7.22042e-06	1.01042e-05	9.18916e-06	7.89223e-06	6.88937e-06	7.34819e-06	8.28109e-06	8.03938e-06	9.11606e-06	7.99407e-06
Acetone cyanohydrin	Organic oxygen compounds	1.34956e-05	1.36239e-05	1.82131e-05	2.01528e-05	2.21704e-05	1.02967e-05	6.83346e-06	1.02864e-05	1.24253e-05	9.90215e-06	1.04344e-05	8.69066e-06	1.02555e-05	6.24484e-06	1.11676e-05	1.35827e-05	1.08055e-05	1.00201e-05
Acetyl-CoA	Lipids and lipid-like molecules	2.9961e-07	1.5808e-06	2.08816e-06	2.65673e-06	3.81589e-06	1.75006e-06	1.97481e-06	1.1661e-06	5.19769e-07	1.52328e-06	3.6018e-06	1.13258e-06	2.03679e-06	2.16042e-06	1.85453e-06	6.66732e-07	4.4702e-07	2.2923e-06
Dukunolide B	Organoheterocyclic compounds	1.2833e-07	1.45427e-07	4.84876e-07	2.92102e-07	1.11463e-06	2.1143e-06	1.55983e-06	2.60284e-06	1.98434e-06	3.1062e-06	3.28212e-06	3.64849e-06	2.0277e-06	1.489e-06	2.03131e-06	8.96548e-07	1.38331e-07	1.70641e-06
PC(16:0/16:0)	Lipids and lipid-like molecules	0.000154665	0.000264813	0.000322299	0.000176854	0.000164651	0.000165022	0.000239252	0.000150849	0.000195401	0.000265681	0.000231279	0.000140987	0.000176928	0.000159947	0.000248139	0.000226699	0.00091366	0.000159083
2-(3,4-dihydroxyphenyl)-3,5,7-trihydroxy-1Î»â´-chromen-1-ylium	Phenylpropanoids and polyketides	3.61091e-06	8.94069e-06	6.09957e-06	8.50652e-06	8.29785e-06	1.20923e-05	7.9495e-06	7.08615e-06	5.36962e-06	1.12175e-05	9.05437e-06	1.2186e-05	6.80045e-06	7.21019e-06	7.99797e-06	2.84815e-06	4.73513e-06	8.44262e-06
PC(18:1(11Z)/14:0)		4.02046e-05	0.000124344	0.000296613	0.000133929	3.48176e-05	8.28149e-05	5.40381e-05	5.22914e-05	0.000107607	0.000190209	0.000163745	7.05465e-05	0.000113178	0.000103135	0.000276698	0.000239666	0.000164648	0.000132013
Prolyl-Glutamine	Organic acids and derivatives	6.86146e-06	3.16463e-06	2.39667e-06	2.4805e-06	2.50722e-06	3.29199e-06	3.61681e-06	4.24499e-06	4.32006e-06	3.79688e-06	4.48624e-06	4.06393e-06	4.27462e-06	2.84803e-06	5.60574e-06	3.40431e-06	7.57849e-06	4.11312e-06
1,2,3,4,Tetrahydro-1,5,7-trimethylnapthalene	Benzenoids	1.92319e-05	2.08646e-05	2.04169e-05	1.68135e-05	1.85633e-05	1.8033e-05	1.54674e-05	1.33201e-05	1.7576e-05	1.86792e-05	1.71135e-05	1.58344e-05	1.06715e-05	1.06771e-05	1.23138e-05	1.28069e-05	1.42093e-05	1.85079e-05
2-Methyl-3-oxopropanoic acid	Organic oxygen compounds	0.000106483	0.000129749	0.000110514	0.000115177	0.000115935	0.00011034	9.89578e-05	0.00010652	0.000108672	0.000122689	9.75944e-05	0.000121228	0.000110146	0.00010555	0.000110079	0.000110569	0.000114424	0.00010646
Aspartyl-Arginine	Organic acids and derivatives	1.7878e-06	3.49874e-06	4.84094e-07	4.21364e-07	1.1352e-05	2.00972e-06	1.50526e-06	1.02462e-05	7.10831e-07	1.99954e-08	1.18313e-05	1.45375e-06	3.01389e-06	9.11661e-07	7.07312e-07	7.59098e-06	1.71802e-06	1.05607e-06
Thiomorpholine 3-carboxylate	Organic acids and derivatives	8.61792e-05	8.50567e-05	0.000175494	0.000185131	0.000142806	3.58728e-05	5.98687e-05	5.76156e-05	0.000100181	5.97418e-05	5.15684e-05	5.49768e-05	8.4792e-05	8.31737e-05	7.5097e-05	8.84582e-05	0.000119296	8.29016e-05
4-ethylamino-6-isopropylamino-1,3,5-triazin-2-ol	Organoheterocyclic compounds	4.28313e-06	6.48966e-06	4.85451e-06	4.39829e-06	3.50524e-06	2.41295e-06	3.12186e-06	3.8049e-06	2.93882e-06	4.86162e-06	3.89786e-06	2.82395e-06	4.24011e-06	5.58031e-06	3.26349e-06	2.99136e-06	3.59393e-06	3.18303e-06
Ethylbenzene	Benzenoids	1.5678e-05	1.43634e-05	2.06044e-05	1.44746e-05	1.89055e-05	1.19631e-05	2.33969e-05	1.24689e-05	1.52895e-05	1.67545e-05	1.36614e-05	1.43134e-05	1.2232e-05	9.85603e-06	1.10596e-05	1.40334e-05	1.5421e-05	1.54841e-05
PC(22:6(4Z,7Z,10Z,13Z,16Z,19Z)/16:0)		0.0177733	0.0233867	0.0167991	0.0311283	0.017458	0.018351	0.0300741	0.0296472	0.0324652	0.0160067	0.0230207	0.0246471	0.0141259	0.029972	0.0265515	0.0293014	0.00743683	0.0163984
trans-Hexadec-2-enoyl carnitine	Lipids and lipid-like molecules	5.01518e-05	3.03489e-05	4.32389e-05	0.000207429	9.4022e-05	0.00139563	0.000619133	0.000163479	0.000446715	0.000433155	0.00198511	0.000398424	0.000228272	0.00102676	9.22055e-05	0.000171536	0.000111166	0.000448395
Phytosphingosine	Organic nitrogen compounds	9.72782e-06	1.59888e-05	2.78141e-05	3.91556e-05	3.67687e-05	4.09259e-05	3.958e-05	2.19145e-05	2.6669e-05	1.88527e-05	3.49594e-05	7.59209e-05	1.91549e-05	4.71933e-05	1.56064e-05	3.30951e-05	8.01136e-05	3.33588e-05
Isolinderanolide	Organoheterocyclic compounds	0.000438578	0.000782569	0.000566259	0.000278795	0.000449363	0.000347776	0.000442365	0.000436273	0.000364158	0.000493528	0.000253368	0.000384829	0.000476225	0.000494548	0.000516944	0.000366462	0.000533832	0.000350727
(-)-Dioxibrassinin	Organic acids and derivatives	1.38987e-06	2.68042e-06	1.57538e-06	1.93919e-06	2.16009e-06	1.66665e-06	1.26263e-06	2.4073e-06	1.54425e-06	2.42592e-06	2.744e-06	2.92923e-06	2.56038e-06	2.12715e-06	2.45223e-06	3.46983e-06	2.65864e-06	2.00849e-06
(4-Hydroxybenzoyl)choline	Organooxygen compounds	1.1186e-05	8.03027e-06	7.57957e-06	1.917e-05	9.44737e-06	7.16559e-06	8.11436e-06	5.98448e-06	9.80252e-06	9.07948e-06	1.39465e-05	9.31578e-06	9.16395e-06	1.7458e-05	9.37239e-06	8.45786e-06	6.81387e-06	1.09277e-05
Cincassiol B	Lipids and lipid-like molecules	2.97886e-06	5.86312e-06	5.06721e-06	5.63261e-06	6.47327e-06	5.47576e-06	6.57739e-06	5.34716e-06	5.21557e-06	6.08988e-06	6.56911e-06	5.62941e-06	4.51478e-06	4.93498e-06	5.89492e-06	4.43259e-06	6.50379e-06	4.52858e-06
Glucosamine 6-phosphate	Organic oxygen compounds	1.81845e-08	4.93339e-06	4.13669e-06	1.86405e-06	5.49445e-07	1.7781e-05	8.51322e-08	1.27746e-06	5.51489e-06	2.10954e-05	6.52131e-06	1.87482e-05	4.26851e-06	1.49187e-05	1.70659e-05	5.76073e-07	1.1005e-05	5.8892e-06
PC(16:0/P-16:0)	Lipids and lipid-like molecules	3.93263e-05	5.8628e-05	0.000125589	6.44477e-05	6.44435e-05	2.42499e-05	2.56567e-05	1.74677e-05	2.2345e-05	1.57526e-05	1.30933e-05	1.913e-05	1.58265e-05	1.59038e-05	2.4626e-05	3.7341e-05	2.02141e-05	1.6216e-05
3beta,6beta-Dihydroxynortropane	Alkaloids and derivatives	8.2641e-05	3.75031e-05	5.15324e-05	4.27613e-05	6.20107e-05	4.3749e-05	4.97899e-05	2.5841e-05	3.66894e-05	2.98365e-05	5.06459e-05	1.62543e-05	6.53718e-05	4.7911e-05	5.69328e-05	4.5143e-05	2.85392e-05	3.42401e-05
N2-(3-Carboxy-2-hydroxy-1-oxopropyl)arginine	Organic acids and derivatives	7.17154e-07	1.01035e-06	1.21307e-06	1.78209e-06	7.15328e-07	5.92024e-07	1.43658e-06	9.96367e-07	1.85189e-06	2.0661e-06	6.4097e-07	1.86539e-06	1.17542e-06	1.76739e-06	1.09381e-06	7.29684e-07	2.64548e-06	1.76678e-06
Isotetrandrine	Organoheterocyclic compounds	7.17031e-06	3.36383e-06	2.18777e-06	1.6811e-06	2.96966e-06	1.15797e-06	1.84403e-06	2.90324e-06	4.37141e-06	9.34765e-07	1.13962e-06	1.30168e-06	1.41494e-06	1.98724e-06	2.7266e-06	2.86369e-06	3.89694e-06	2.334e-06
D-Erythrose 4-phosphate	Organic oxygen compounds	6.44289e-06	9.57747e-06	9.64526e-06	1.0783e-05	9.41347e-06	1.06859e-05	8.42788e-06	9.51289e-06	1.00875e-05	1.38988e-05	9.98687e-06	1.11585e-05	6.44256e-06	1.03971e-05	1.24051e-05	9.87422e-06	8.56329e-06	6.67761e-06
Epicatechin 3-O-(4-methylgallate)	Phenylpropanoids and polyketides	2.64396e-06	2.27082e-06	2.60667e-06	3.55431e-06	3.23858e-06	3.02078e-06	2.93224e-06	2.7284e-06	3.35084e-06	2.92053e-06	3.7971e-06	2.79182e-06	3.02925e-06	3.86805e-06	3.30387e-06	2.71196e-06	2.83288e-06	3.42024e-06
Argininosuccinic acid	Organic acids and derivatives	3.11493e-05	9.59559e-06	1.32253e-05	8.22097e-06	9.83353e-06	9.19654e-06	1.01185e-05	1.62796e-05	3.94765e-05	1.3532e-05	1.19512e-05	1.47049e-05	9.1495e-06	1.65147e-05	2.54621e-05	1.29689e-05	3.47431e-05	1.11921e-05
Cyclocalopin F	Organoheterocyclic compounds	1.41246e-05	7.53463e-06	6.05971e-06	7.34438e-06	7.61486e-06	4.18618e-06	4.5054e-06	1.27957e-05	1.01897e-05	1.48812e-05	5.15396e-06	1.38142e-05	3.84868e-06	1.43836e-05	1.88837e-05	1.67721e-05	2.29364e-05	9.538e-06
Epidermin	Organic oxygen compounds	0.000479186	0.000592864	0.000572512	0.000592442	0.000585806	0.000914093	0.000766098	0.00092224	0.000901438	0.000864055	0.000899995	0.0007091	0.000644989	0.000843597	0.00074166	0.000548679	0.000917908	0.000694669
2-Methyl-2-phenyl-undecane	Benzenoids	2.17701e-06	4.52826e-06	8.72405e-06	3.0742e-06	8.09333e-07	1.135e-06	6.66245e-07	2.59358e-06	2.78156e-06	2.14378e-06	1.34497e-06	3.94766e-07	3.5137e-07	1.72134e-06	2.81216e-06	7.77984e-07	3.8235e-06	1.13703e-06
Porphobilinogen	Organic nitrogen compounds	7.59152e-06	5.97865e-06	7.49493e-06	1.15057e-05	9.00305e-06	1.41024e-05	7.52621e-06	3.65256e-06	6.08487e-06	6.4638e-06	4.3397e-06	6.48561e-06	1.08824e-05	4.24444e-06	1.90537e-06	6.47125e-06	5.80994e-06	1.13502e-05
1,3-Diisopropylbenzene	Benzenoids	1.58744e-05	1.25492e-05	1.97292e-05	1.17128e-05	2.37607e-05	1.34334e-05	1.97052e-05	1.48977e-05	1.16548e-05	1.54319e-05	1.37017e-05	1.33046e-05	1.00864e-05	7.44615e-06	1.20645e-05	9.38393e-06	1.34765e-05	1.71991e-05
Dihydro-5-methyl-2(3H)-furanone	Organoheterocyclic compounds	2.84684e-05	3.83821e-05	3.83134e-05	3.61874e-05	3.50861e-05	3.82948e-05	5.69286e-05	2.72866e-05	3.81206e-05	3.31548e-05	1.9718e-05	3.01345e-05	2.97081e-05	2.73938e-05	3.22011e-05	2.01711e-05	3.36417e-05	3.45743e-05
1-Methylhistidine	Organic acids and derivatives	5.38757e-05	7.00444e-05	5.72122e-05	7.10621e-05	7.16219e-05	8.19106e-05	2.43101e-05	2.26876e-05	3.04479e-05	6.04815e-05	8.51037e-05	6.72488e-05	3.62354e-05	6.41522e-05	3.5687e-05	4.25596e-05	4.43626e-05	5.59849e-05
PC(16:1(9Z)/P-18:1(11Z))		0.000137539	0.000261414	0.000187194	0.000173501	0.000178212	0.00010801	0.00014908	9.32182e-05	7.06803e-05	0.000129468	0.00013054	8.95707e-05	0.000143955	9.57027e-05	0.000115501	8.47767e-05	8.73981e-05	8.1006e-05
2,6-Dimethoxy-4-(1-propenyl)phenol	Benzenoids	6.74771e-05	7.15409e-05	6.79734e-05	6.23632e-05	5.8933e-05	5.99997e-05	5.82863e-05	6.33456e-05	6.32434e-05	7.03503e-05	7.01774e-05	7.91859e-05	7.15172e-05	7.22781e-05	6.47976e-05	1.25985e-06	6.67324e-05	7.09017e-05
PC(18:2(9Z,12Z)/18:0)	Lipids and lipid-like molecules	0.000473472	0.00070191	0.000798362	0.000577883	0.00050728	0.000605173	0.000550442	0.000408569	0.000342563	0.000902739	0.000722736	0.000713288	0.00109424	0.000605239	0.000648924	0.000579949	0.000396973	0.000490597
Flupoxam	Organoheterocyclic compounds	1.05908e-06	9.23111e-07	7.16157e-07	8.72202e-07	1.32124e-06	3.97588e-07	1.11661e-06	1.21806e-06	5.57978e-07	5.34812e-07	9.52922e-07	6.53584e-07	4.68324e-07	3.979e-07	7.1342e-07	6.80576e-07	5.32663e-07	6.32575e-07
N-gamma-L-Glutamyl-D-alanine	Organic acids and derivatives	2.96433e-06	9.85407e-06	6.80237e-06	9.23325e-06	8.31451e-06	1.09888e-05	6.21752e-06	7.4032e-06	7.96938e-06	8.17625e-06	9.3545e-06	8.81766e-06	9.56091e-06	7.60254e-06	6.24761e-06	6.91786e-06	6.11811e-06	7.4615e-06
PC(20:2(11Z,14Z)/20:4(5Z,8Z,11Z,14Z))	Lipids and lipid-like molecules	0.0107514	0.0151212	0.0160959	0.0127975	0.0100925	0.00988846	0.00884553	0.00891418	0.00963855	0.0136855	0.0103911	0.00976817	0.0100964	0.0105331	0.0124144	0.0105723	0.0134821	0.00911115
Cholesta-4,6-dien-3-one	Lipids and lipid-like molecules	3.49817e-06	4.70539e-06	5.47549e-06	3.44163e-06	2.25708e-06	2.38723e-06	4.12284e-06	1.22775e-06	3.22547e-06	2.87011e-06	5.65259e-06	1.60518e-06	2.60485e-06	1.4149e-06	3.97955e-06	3.26754e-06	4.30577e-06	1.3392e-06
Aspartyl-Glutamate	Organic acids and derivatives	3.24732e-06	1.10707e-05	6.97513e-06	1.09225e-05	5.8759e-06	6.78197e-06	5.98827e-06	6.23078e-06	4.83558e-06	8.745e-06	7.23382e-06	7.00431e-06	7.88025e-06	5.77978e-06	4.64822e-06	6.3973e-06	4.19979e-06	6.75993e-06
Muricatacin		7.75966e-06	8.75188e-06	1.48626e-05	5.90483e-06	8.41081e-06	1.02564e-05	1.01265e-05	1.28855e-05	1.29497e-05	8.0882e-06	5.00951e-06	8.31864e-06	6.12559e-06	1.05607e-05	1.34021e-05	1.13415e-05	1.18039e-05	7.33022e-06
PC(22:6(4Z,7Z,10Z,13Z,16Z,19Z)/20:3(5Z,8Z,11Z))	Lipids and lipid-like molecules	5.83226e-05	8.03745e-05	7.48654e-05	7.10427e-05	6.02891e-05	8.49993e-05	7.03299e-05	0.000104918	0.000109543	0.000116998	8.40935e-05	0.000106187	8.55205e-05	8.43607e-05	9.64635e-05	8.42796e-05	0.000100744	0.000109968
LysoPC(16:0)	Lipids and lipid-like molecules	0.0101541	0.00535447	0.00426978	0.00373968	0.00543923	0.00383426	0.00350174	0.00554673	0.0070285	0.00320029	0.00311809	0.00402556	0.00291519	0.00413981	0.00784228	0.00602581	0.00850036	0.00495756
PC(18:2(9Z,12Z)/14:0)	Lipids and lipid-like molecules	7.7308e-05	5.70213e-05	0.000118453	0.000150213	0.000240422	6.4893e-05	0.000114035	0.000114154	0.000105548	7.53633e-06	6.30922e-05	0.000149499	0.000148617	9.06517e-05	0.000139101	0.00010289	1.41312e-05	0.000145781
LysoPC(P-18:1(9Z))	Lipids and lipid-like molecules	6.02459e-05	2.07411e-05	1.10841e-05	4.5998e-06	2.72699e-05	2.25586e-05	2.55299e-05	5.0686e-05	7.26885e-05	1.78287e-05	1.26436e-05	1.88111e-05	1.58205e-05	2.1431e-05	4.29065e-05	4.33589e-05	8.28553e-05	2.71713e-05
2-O-(5,8,11,14,17-Eicosapentaenoyl)-1-O-hexadecylglycero-3-phosphocholine	Lipids and lipid-like molecules	7.03468e-05	7.1044e-05	9.80691e-05	6.13644e-05	5.74066e-05	0.000118392	8.96658e-05	8.54326e-05	0.000102038	9.49628e-05	8.00514e-05	9.46615e-05	0.000125741	9.72096e-05	7.564e-05	0.000101747	4.93775e-05	0.0001089
3-Methyl-5-pentyl-2-furanundecanoic acid	Lipids and lipid-like molecules	7.66308e-05	1.64444e-05	1.89086e-05	1.36024e-05	1.75568e-05	5.5639e-06	1.20509e-05	1.02711e-05	2.34612e-05	1.04054e-05	1.21864e-05	1.67011e-05	1.98104e-05	1.65371e-05	2.6214e-05	1.78453e-05	2.81723e-05	1.23993e-05
PC(18:2(9Z,12Z)/15:0)	Lipids and lipid-like molecules	2.51271e-05	3.67831e-05	5.22446e-05	3.86527e-05	4.72131e-05	1.25542e-05	2.64196e-05	1.10473e-05	4.46922e-06	9.12968e-06	2.03235e-05	1.51677e-05	4.79312e-05	1.81677e-05	5.60782e-05	2.18308e-05	2.08956e-05	1.37299e-05
Carbadox	Organoheterocyclic compounds	1.13085e-05	2.36457e-06	6.9148e-06	7.50317e-06	5.94977e-06	1.09245e-05	5.75566e-06	5.52332e-06	7.6644e-06	1.07056e-05	1.14852e-05	7.86317e-06	6.75638e-06	1.22209e-05	9.25906e-06	4.15015e-06	5.23337e-06	8.85924e-06
Sterebin E	Lipids and lipid-like molecules	8.55455e-07	1.85814e-06	1.11852e-06	8.83504e-07	1.85554e-08	7.89782e-06	2.12107e-06	5.06449e-07	3.11435e-06	2.59432e-06	1.05739e-05	2.66632e-06	4.08405e-07	3.7845e-06	1.1586e-06	2.17142e-06	2.68992e-06	2.03905e-06
PC(20:2(11Z,14Z)/14:0)	Lipids and lipid-like molecules	0.00169538	0.00212601	0.00414352	0.00212262	0.00226524	0.00143372	0.000845503	0.000728413	0.00117292	0.0017596	0.00147296	0.00194983	0.00313843	0.00244396	0.00113018	0.00102584	0.000493662	0.00159672
SM(d17:1/24:0)	Organic nitrogen compounds	1.04227e-05	2.7601e-05	4.56593e-05	1.88455e-05	1.1298e-05	1.84608e-05	1.77943e-05	1.31277e-05	1.65024e-05	5.62413e-05	1.18374e-05	1.15126e-05	1.56341e-05	1.52917e-05	3.10007e-05	1.22352e-05	3.27883e-05	2.11205e-05
PC(18:1(11Z)/15:0)	Lipids and lipid-like molecules	1.3496e-05	1.82453e-05	2.41361e-05	1.98898e-05	9.0714e-06	1.27863e-05	1.05413e-05	8.21633e-06	1.00312e-05	1.35088e-05	1.15617e-05	1.30131e-05	1.75388e-05	8.35745e-06	2.20975e-05	1.5414e-05	1.42986e-05	1.09257e-05
SM(d17:1/24:1(15Z))	Organic nitrogen compounds	1.392e-05	4.03244e-05	5.80684e-05	2.81889e-05	1.64441e-05	2.39382e-05	1.16451e-05	1.52439e-05	1.93211e-05	5.29356e-05	2.77984e-05	1.52865e-05	1.64737e-05	2.15571e-05	3.66977e-05	2.46447e-05	5.27453e-05	1.98024e-05
Pseudoionone	Lipids and lipid-like molecules	1.45607e-05	1.25297e-05	1.08131e-05	9.90628e-06	1.73155e-05	1.54456e-05	1.10269e-05	7.05984e-06	1.20553e-05	1.12971e-05	1.26757e-05	1.16661e-05	6.6003e-06	2.25884e-06	6.62243e-06	8.95451e-06	1.35164e-05	1.65901e-05
PC(18:3(6Z,9Z,12Z)/18:1(11Z))		0.00112241	0.00138609	0.00184138	0.00117803	0.00111412	0.00191839	0.00114228	0.00139991	0.00128607	0.00150911	0.00134979	0.00170841	0.00188249	0.00138943	0.0017199	0.00156685	0.00106872	0.00173644
SM(d18:1/20:0)	Lipids and lipid-like molecules	0.00017644	0.00034811	0.000560189	0.000274457	0.000222861	0.000237249	0.000208333	0.000167095	0.000230058	0.000423082	0.00016679	0.000198093	0.000175222	0.000219064	0.000250894	0.000267388	0.000360826	0.000244971
Cervonyl carnitine	Lipids and lipid-like molecules	5.28252e-05	3.39163e-05	1.41959e-05	6.23822e-05	4.24767e-05	2.56248e-05	2.89122e-05	3.32429e-05	5.56445e-05	2.1887e-05	3.71133e-05	2.91232e-05	2.90538e-05	3.5885e-05	2.469e-05	3.96675e-05	2.01183e-05	3.56157e-05
SM(d18:1/22:0)	Lipids and lipid-like molecules	7.00013e-05	6.04803e-05	0.000184322	8.84682e-05	7.73501e-05	8.2545e-05	8.25663e-05	6.70609e-05	9.31489e-05	0.000255391	4.17237e-05	6.36396e-05	6.82478e-05	7.54036e-05	0.000121334	7.56265e-05	0.000151633	9.39527e-05
Phosphoribosyl formamidocarboxamide	Nucleosides, nucleotides, and analogues	6.38549e-07	1.06137e-06	6.95226e-07	1.01819e-06	1.07473e-06	1.02073e-06	1.37725e-06	9.70386e-07	8.70195e-07	8.0278e-07	1.07216e-06	5.80801e-07	8.91851e-07	6.23521e-07	5.15079e-07	7.99828e-07	9.36936e-07	1.11953e-06
SM(d18:1/18:1(9Z))	Lipids and lipid-like molecules	0.000199148	0.000243364	0.000297218	0.000311579	0.0001781	0.000278531	0.000135273	0.0002264	0.000247714	0.000374956	0.000311233	0.000261504	0.000291841	0.00025961	0.000329998	0.000393732	0.000310072	0.000261413
SM(d16:1/24:1(15Z))	Organic nitrogen compounds	7.76497e-05	0.000186102	0.000229163	0.00014307	8.64237e-05	0.000105442	4.16466e-05	7.15929e-05	0.000107161	0.000231344	9.78357e-05	7.39361e-05	7.01707e-05	0.000100251	0.000154206	0.000130381	0.000190177	9.24845e-05
LysoPC(18:3(6Z,9Z,12Z))	Lipids and lipid-like molecules	0.000193892	6.62029e-05	7.44068e-05	7.31607e-05	0.000111864	7.22461e-05	7.73242e-05	9.56344e-05	0.000132927	4.97173e-05	3.69807e-05	0.000100892	7.91983e-05	8.92957e-05	0.000143992	9.48972e-05	0.00010976	0.000102606
LysoPC(P-16:0)	Lipids and lipid-like molecules	0.000110267	1.94994e-05	2.05806e-05	5.56257e-06	1.7265e-05	1.45392e-05	1.89639e-05	3.01986e-05	8.47757e-05	1.45151e-05	7.41412e-06	1.54871e-05	8.96308e-06	1.93244e-05	5.76491e-05	4.35178e-05	0.000102784	2.23577e-05
Methylguanidine	Organic nitrogen compounds	7.71803e-05	8.50335e-05	8.47433e-05	0.00011574	9.51505e-05	8.84692e-05	0.000116537	0.000111745	0.000118098	0.000109498	9.66681e-05	0.000102111	0.000112005	9.20063e-05	0.00010119	0.000104968	8.50427e-05	0.000105584
PI(18:1(9Z)/18:1(9Z))	Lipids and lipid-like molecules	4.36629e-06	6.57511e-06	7.30169e-06	7.52641e-06	9.04253e-06	5.657e-06	5.11451e-06	3.34376e-06	3.86218e-06	6.27018e-06	5.2679e-06	5.73622e-06	5.5235e-06	6.03068e-06	3.35819e-06	4.56195e-06	3.67883e-06	5.11229e-06
PC(20:5(5Z,8Z,11Z,14Z,17Z)/P-18:0)	Lipids and lipid-like molecules	0.00112414	0.0013238	0.00136725	0.00118891	0.00122194	0.001414	0.00128283	0.00131387	0.00154201	0.00163022	0.00138128	0.00110149	0.0012817	0.00128718	0.00153373	0.00124644	0.0016324	0.00112888
Dihydrothymine	Organoheterocyclic compounds	6.35914e-06	2.97647e-06	4.30392e-06	6.3035e-06	7.15053e-06	3.6825e-06	4.81808e-06	8.84621e-06	6.54495e-06	7.65789e-06	4.90661e-06	9.6723e-06	9.16721e-06	7.75462e-06	4.55593e-06	3.6986e-06	5.4314e-06	5.32014e-06
L-alpha-Aspartyl-L-hydroxyproline	Organic acids and derivatives	2.55789e-05	8.98539e-05	6.69453e-05	0.000131444	9.22313e-05	0.000109745	9.69709e-05	7.23002e-05	8.63248e-05	0.000141391	9.0389e-05	0.000114299	0.000104686	0.000117717	7.15083e-05	5.9454e-05	4.31885e-05	8.94164e-05
PC(20:3(8Z,11Z,14Z)/14:0)	Lipids and lipid-like molecules	0.000234404	4.97532e-05	0.000329374	0.000338083	0.000483782	0.00025269	0.000228203	0.000205843	0.000362656	0.00023775	0.000311015	0.000487022	0.000544011	0.000389377	0.000366464	0.000349291	0.000101982	0.000385852
Norophthalmic acid	Organic acids and derivatives	7.71754e-06	2.82919e-05	1.82061e-05	1.43434e-05	2.0593e-05	2.03344e-05	1.70607e-05	2.45499e-05	1.59993e-05	1.77086e-05	1.98251e-05	3.12167e-05	1.11982e-05	2.0584e-05	2.63779e-05	1.76042e-05	2.47967e-05	2.20966e-05
Vulgaxanthin I	Organic acids and derivatives	1.07613e-06	7.92822e-06	6.55596e-06	7.05787e-06	5.75158e-06	1.33655e-05	6.00951e-06	4.13475e-06	5.64011e-06	1.30556e-05	9.42259e-06	1.40087e-05	1.11988e-05	8.51405e-06	7.96004e-06	6.15367e-06	6.3605e-06	1.08125e-05
PC(P-18:1(11Z)/22:6(4Z,7Z,10Z,13Z,16Z,19Z))	Lipids and lipid-like molecules	6.10918e-05	4.04177e-05	5.54819e-05	4.39714e-05	6.98569e-05	0.000114186	7.05707e-05	6.56357e-05	0.00010668	9.5048e-05	5.47537e-05	6.67061e-05	7.05272e-05	8.87648e-05	4.60251e-05	7.84064e-05	2.11249e-05	7.88859e-05
PC(15:0/15:0)	Lipids and lipid-like molecules	5.4244e-05	3.92894e-05	5.76167e-05	0.000117794	3.0474e-05	3.02981e-05	5.25858e-05	3.47011e-05	4.49166e-05	3.48496e-05	2.90829e-05	4.93284e-05	3.9685e-05	3.36239e-05	3.98206e-05	6.89799e-05	2.30926e-05	4.76294e-05
3'-Hydroxyhexobarbital	Organoheterocyclic compounds	8.10865e-07	1.0385e-05	3.25249e-06	2.79606e-06	3.42195e-06	8.03486e-06	4.2452e-06	5.97417e-06	2.73683e-06	6.95521e-06	6.34316e-06	1.01891e-05	3.44344e-06	6.42738e-06	6.51888e-06	4.56725e-06	8.4911e-06	4.93299e-06
PC(20:2(11Z,14Z)/15:0)	Lipids and lipid-like molecules	0.000109213	0.000158557	0.000160019	0.000128088	0.000130644	7.14569e-05	0.0001341	5.94436e-05	5.85852e-05	9.95467e-05	0.000113531	9.91689e-05	0.000139234	0.000104029	9.98594e-05	8.22687e-05	5.44785e-05	8.7474e-05
gamma-Glutamylglutamic acid	Organic acids and derivatives	4.26198e-06	3.60736e-06	2.54517e-06	1.8663e-06	2.93765e-06	3.00053e-06	1.74037e-06	3.14088e-06	3.38991e-06	2.6581e-06	3.6442e-06	3.23845e-06	1.85496e-06	2.1394e-06	4.17006e-06	4.30817e-06	4.61152e-06	2.92599e-06
Mangiferdesmethylursanone	Organic oxygen compounds	0.0002843	0.000209126	0.000259728	0.000128567	9.06129e-05	0.000212501	0.000191187	0.00018826	0.000255421	0.000201767	0.000184536	0.00014157	0.000343264	0.000173072	0.000255629	0.000167288	0.000447474	0.000179091
LysoPE(18:1(9Z)/0:0)	Lipids and lipid-like molecules	0.000315666	5.36895e-05	7.0674e-05	2.81117e-05	6.83067e-05	6.60523e-05	3.35961e-05	0.00013533	0.000314289	6.299e-05	5.51088e-05	0.000118985	4.93829e-05	9.68092e-05	0.000205483	0.00017552	0.000353865	0.000140251
PC(22:6(4Z,7Z,10Z,13Z,16Z,19Z)/22:6(4Z,7Z,10Z,13Z,16Z,19Z))	Lipids and lipid-like molecules	8.71195e-05	5.95485e-05	7.47754e-05	7.61638e-05	6.83973e-05	7.35472e-05	0.000113043	0.000158276	0.000160551	0.00014222	0.000127819	0.000131029	8.73213e-05	0.000114762	0.00010955	9.77479e-05	0.000133997	0.000130669
PC(18:0/14:0)	Lipids and lipid-like molecules	0.00146216	0.00216894	0.0015725	0.00156553	0.00143656	0.00126204	0.000917796	0.00127939	0.00165019	0.0016224	0.0010403	0.00146893	0.00136603	0.00121186	0.00136907	0.00168344	0.00101137	0.00160242
PC(22:4(7Z,10Z,13Z,16Z)/15:0)	Lipids and lipid-like molecules	4.33337e-06	3.79898e-05	4.64269e-05	2.52485e-05	1.77634e-05	4.10898e-05	3.6945e-05	2.11033e-05	1.8803e-08	2.08372e-05	3.98022e-05	4.4054e-05	5.2678e-05	1.83461e-05	4.85764e-05	3.3385e-05	3.36419e-05	5.21522e-05
DG(18:4(6Z,9Z,12Z,15Z)/18:1(11Z)/0:0)	Lipids and lipid-like molecules	8.27045e-06	9.32792e-06	1.01029e-05	1.25668e-05	1.2161e-05	5.28945e-06	1.01905e-05	1.04008e-05	5.91263e-06	9.46056e-06	6.98261e-06	9.13292e-06	1.23255e-05	1.1274e-05	1.1269e-05	8.4431e-06	6.96132e-06	6.51452e-06
LysoPC(24:0)	Lipids and lipid-like molecules	1.02015e-05	1.87558e-05	1.60045e-05	1.64155e-05	1.32171e-05	5.99168e-06	1.0448e-05	4.98768e-06	5.51948e-06	8.17852e-06	8.49876e-06	5.77847e-06	1.09957e-05	6.23475e-06	7.56184e-06	1.06758e-05	4.46641e-06	7.92508e-06
PC(P-18:1(11Z)/22:5(4Z,7Z,10Z,13Z,16Z))	Lipids and lipid-like molecules	0.000107674	0.000129286	0.00010009	0.000133075	7.97502e-05	0.00021935	0.000191735	0.000131587	0.000117105	0.000129977	0.000133486	7.07514e-05	8.85636e-05	6.09021e-05	9.25194e-05	7.62079e-05	0.000189488	4.63468e-05
CDP-Ethanolamine	Nucleosides, nucleotides, and analogues	3.61699e-06	6.44327e-06	4.23513e-06	6.3135e-06	5.43169e-06	6.53498e-06	3.93149e-06	5.52611e-06	4.75778e-06	6.70088e-06	6.82491e-06	7.53594e-06	4.43953e-06	5.54952e-06	7.93478e-06	4.8425e-06	6.59851e-06	7.00746e-06
SM(d18:0/18:1(9Z))	Lipids and lipid-like molecules	0.000109451	8.93909e-05	0.000165677	0.000146666	0.000119459	0.000208874	0.00018362	0.000167147	0.000159732	0.000182385	0.000110925	0.000197258	0.00021806	0.000152378	0.000138619	0.000228921	0.000141155	0.000193103
PC(16:0/15:0)	Lipids and lipid-like molecules	7.83791e-05	8.66541e-05	0.000101098	4.17888e-05	5.30946e-05	3.40274e-05	6.30791e-05	3.79581e-05	4.03055e-05	4.40059e-05	3.67315e-05	5.0112e-05	5.38093e-05	4.30663e-05	4.38943e-05	4.92472e-05	2.65319e-05	4.84512e-05
PC(22:6(4Z,7Z,10Z,13Z,16Z,19Z)/16:1(9Z))	Lipids and lipid-like molecules	0.000114877	7.65473e-05	0.000102415	0.000120803	0.000161376	0.000146441	6.01103e-05	0.000166367	0.000261614	0.000127519	7.42142e-05	0.000218409	0.000123598	0.000114879	0.000133262	0.000166492	0.000125705	0.000197813
PC(22:5(7Z,10Z,13Z,16Z,19Z)/16:1(9Z))	Lipids and lipid-like molecules	0.000793483	0.00149534	0.00499751	0.00204718	0.00140555	0.00140668	0.00179095	0.000393333	0.00067418	0.002729	0.00234219	0.000293835	0.000679587	0.00115165	0.00250204	0.00178346	0.00744176	0.000959853
LysoPE(18:2(9Z,12Z)/0:0)	Lipids and lipid-like molecules	0.000120557	2.1639e-05	3.19242e-05	9.27794e-06	3.1196e-05	1.42144e-05	1.78874e-05	4.30873e-05	8.9078e-05	3.15643e-05	3.25919e-05	3.10556e-05	4.2971e-05	5.25429e-05	0.000109041	6.36546e-05	0.000105249	3.63605e-05
(Â±)-2,2'-Iminobispropanoic acid	Organic acids and derivatives	0.000119147	0.000129298	0.00013362	0.000121834	0.000129202	0.000113617	9.62451e-05	0.000113182	0.000129369	0.000133696	0.000113553	0.000123738	8.82211e-05	8.77799e-05	8.66797e-05	0.000121967	0.000119316	0.000130504
Thiamine monophosphate	Organoheterocyclic compounds	3.97491e-05	1.36075e-05	3.20227e-05	3.60525e-05	2.02592e-05	1.8723e-05	2.25309e-05	2.04745e-05	3.20067e-05	2.26463e-05	2.02386e-05	2.91529e-05	1.12396e-05	2.36759e-05	4.19226e-05	3.1017e-05	4.46755e-05	1.79145e-05
N-Alpha-acetyllysine	Organic acids and derivatives	5.05426e-06	5.33556e-06	4.44621e-06	7.26545e-06	6.67524e-06	1.04972e-05	9.67075e-06	6.07361e-06	5.19739e-06	9.60408e-06	7.67724e-06	6.18006e-06	7.00902e-06	8.28539e-06	6.80759e-06	5.3039e-06	6.22099e-06	5.36415e-06
LysoPE(22:6(4Z,7Z,10Z,13Z,16Z,19Z)/0:0)	Lipids and lipid-like molecules	0.00218889	0.000420363	0.00052815	0.000182492	0.000520455	0.000233346	0.000224323	0.000595406	0.00143474	0.000344307	0.000245184	0.000496409	0.000289899	0.00049303	0.00107512	0.000705589	0.00154584	0.000446867
SM(d18:1/14:0)	Lipids and lipid-like molecules	2.60653e-05	2.84535e-05	3.36793e-05	3.6995e-05	3.3241e-05	2.76157e-05	3.01577e-05	2.65341e-05	2.44645e-05	3.60344e-05	3.46398e-05	3.59528e-05	4.12552e-05	3.12723e-05	3.75432e-05	3.90425e-05	4.70578e-06	3.09733e-05
Persicaxanthin	Lipids and lipid-like molecules	0.000719752	0.00014738	0.000182983	6.55673e-05	0.000171925	8.46207e-05	8.06909e-05	0.000186309	0.000446049	0.000108982	8.05137e-05	0.000175486	9.22605e-05	0.000161777	0.000341862	0.000238773	0.000517248	0.000142184
2-acetyl-1-alkyl-sn-glycero-3-phosphocholine	Lipids and lipid-like molecules	0.00213618	0.000978735	0.000742888	0.000867631	0.00116778	0.000943921	0.00104985	0.00176844	0.00182052	0.000732205	0.00101334	0.000876343	0.000804808	0.00127644	0.00195844	0.00142442	0.0021943	0.00153747
PC(20:4(5Z,8Z,11Z,14Z)/20:4(8Z,11Z,14Z,17Z))	Lipids and lipid-like molecules	0.000976306	0.000581055	0.00122493	0.000661821	0.000949118	0.000468654	0.000645509	0.000672172	0.000648854	0.000960856	0.000818178	0.001039	0.00100083	0.00102074	0.000544322	0.000670562	0.000340975	0.00107862
PC(22:6(4Z,7Z,10Z,13Z,16Z,19Z)/20:1(11Z))	Lipids and lipid-like molecules	3.35933e-05	2.44198e-05	4.66135e-05	3.68409e-05	4.65555e-05	2.872e-05	7.85525e-06	2.54061e-05	2.93346e-05	2.16745e-05	1.95785e-05	1.91804e-05	1.29063e-05	1.75163e-05	2.61069e-05	2.26466e-05	3.31763e-05	2.75487e-05
PC(20:4(8Z,11Z,14Z,17Z)/15:0)	Lipids and lipid-like molecules	2.08353e-05	3.98266e-05	4.13623e-05	2.20339e-05	9.79536e-06	4.4309e-05	2.59876e-05	3.41273e-05	2.81062e-05	7.32061e-05	3.76298e-05	3.87365e-05	3.97758e-05	3.59505e-05	3.92537e-05	4.81343e-05	6.20764e-05	3.77214e-05
PC(18:1(11Z)/P-16:0)	Lipids and lipid-like molecules	0.000168687	0.000289706	0.000362125	0.000249294	0.000284797	7.77784e-05	9.99616e-05	5.52247e-05	6.92982e-05	0.00011479	6.18821e-05	5.52668e-05	6.38172e-05	8.90958e-05	6.26204e-05	0.000161152	7.94424e-05	4.92463e-05
PC(18:1(9Z)/P-16:0)	Lipids and lipid-like molecules	5.188e-05	7.33041e-05	0.000123413	7.21422e-05	7.89698e-05	2.53354e-05	3.13166e-05	1.91869e-05	1.71702e-05	2.72209e-05	2.1078e-05	2.00519e-05	3.38057e-05	2.42941e-05	2.05036e-05	3.37454e-05	2.23283e-05	1.8723e-05
Tyrosyl-Lysine	Organic acids and derivatives	5.14195e-05	9.21732e-06	7.63678e-06	6.79263e-06	7.94076e-06	6.61768e-06	6.73564e-06	1.02916e-05	1.18966e-05	8.13598e-06	1.20505e-05	1.44457e-05	9.35856e-06	7.51941e-06	1.08546e-05	9.92012e-06	3.28958e-05	5.73873e-06
PC(22:5(4Z,7Z,10Z,13Z,16Z)/P-18:0)	Lipids and lipid-like molecules	2.20653e-05	3.80446e-05	7.48431e-05	2.71369e-05	1.96431e-05	1.80697e-05	1.89028e-05	2.34083e-05	1.29723e-05	8.87293e-06	8.84842e-06	6.75726e-06	1.53665e-05	7.98127e-06	2.02434e-05	1.545e-05	2.80984e-05	9.13332e-06
Progesterone	Lipids and lipid-like molecules	8.58176e-07	2.82594e-06	4.15424e-06	1.51933e-05	1.21315e-05	3.78083e-05	3.2595e-05	1.01227e-05	9.70968e-06	2.71658e-05	4.44693e-05	1.88327e-05	1.41994e-05	2.34692e-05	3.82618e-06	6.92473e-06	3.51437e-06	1.70328e-05
Isotheaflavin	Phenylpropanoids and polyketides	7.71479e-05	5.81771e-05	5.07449e-05	5.27584e-05	5.94469e-05	5.21118e-05	5.74859e-05	4.80804e-05	5.40976e-05	4.7659e-05	4.93819e-05	5.36878e-05	4.29792e-05	4.86369e-05	5.92459e-05	4.72056e-05	6.34178e-05	4.5089e-05
5,8-Dihydro-6-(4-methyl-3-pentenyl)-1,2,3,4-tetrathiocin	Organoheterocyclic compounds	2.44178e-06	2.89541e-06	3.58481e-06	3.13675e-06	2.79662e-06	2.57029e-06	1.79072e-06	2.49742e-06	4.12071e-06	2.80876e-06	2.10014e-06	2.55741e-06	2.3597e-06	2.7873e-06	3.20902e-06	3.06858e-06	9.84609e-07	2.4995e-06
PC(22:6(4Z,7Z,10Z,13Z,16Z,19Z)/20:2(11Z,14Z))	Lipids and lipid-like molecules	3.45604e-05	1.23327e-05	1.0603e-05	1.12501e-05	2.15936e-05	2.3674e-05	1.66637e-05	1.92988e-05	2.18675e-05	2.31376e-05	3.07009e-05	2.62469e-05	1.76598e-05	1.96291e-05	2.575e-05	2.23142e-05	2.55586e-05	3.38152e-05
Pyroglutamic acid	Organic acids and derivatives	8.49974e-05	0.000104029	9.08875e-05	0.000118989	9.61503e-05	0.000112981	0.00013025	9.46736e-05	0.000101474	0.000103625	0.000103472	0.000109072	9.80418e-05	9.81586e-05	0.000105452	8.87958e-05	0.000115272	0.000112597
Hydroxyprolyl-Lysine	Organic acids and derivatives	5.72262e-06	9.32546e-05	4.58057e-05	3.06444e-05	3.31089e-05	3.72e-05	2.80793e-05	4.12564e-05	2.03669e-05	4.33617e-05	4.12009e-05	6.14187e-05	2.88519e-05	5.24877e-05	4.99862e-05	4.15981e-05	7.14698e-05	3.63653e-05
Elaidic carnitine	Lipids and lipid-like molecules	1.64931e-05	1.43515e-05	1.51919e-05	0.000113507	3.71047e-05	0.000788185	0.000549044	9.5991e-05	0.000154022	0.000236142	0.00164736	0.00021902	0.000134841	0.000554061	2.83914e-05	6.27505e-05	3.06636e-05	0.000289416
Thiolutin	Organic nitrogen compounds	3.15613e-06	1.97053e-05	1.67546e-05	1.18723e-05	5.97217e-06	4.48539e-05	4.66754e-06	8.25397e-06	1.99497e-05	4.87414e-05	1.89706e-05	4.3651e-05	1.71718e-05	3.75145e-05	3.62263e-05	8.76204e-06	3.19564e-05	2.26328e-05
2,5-Diamino-6-(5'-triphosphoryl-3',4'-trihydroxy-2'-oxopentyl)-amino-4-oxopyrimidine	Organic oxygen compounds	7.94868e-08	2.67142e-06	2.03615e-06	2.55705e-06	2.65947e-06	2.19378e-06	2.72729e-06	2.03518e-06	1.63278e-06	2.09426e-06	1.89462e-06	2.78305e-06	2.12007e-06	2.54491e-06	1.41109e-06	2.07619e-06	9.54506e-07	1.94708e-06
PC(22:5(4Z,7Z,10Z,13Z,16Z)/20:5(5Z,8Z,11Z,14Z,17Z))	Lipids and lipid-like molecules	4.51966e-05	4.30533e-05	4.64056e-05	5.37462e-05	4.77694e-05	9.17275e-05	8.19748e-05	0.000144147	0.000155009	0.000110225	9.78334e-05	0.000123286	8.86647e-05	8.01074e-05	0.000105138	6.622e-05	0.000106323	0.000133785
2-Azetidinecarboxylic acid	Organic acids and derivatives	5.56491e-05	6.74355e-05	6.1517e-05	9.22833e-05	6.75348e-05	7.21277e-05	8.83971e-05	6.77329e-05	6.36858e-05	7.15296e-05	6.87917e-05	7.63393e-05	6.67694e-05	6.42078e-05	8.30277e-05	5.01401e-05	6.97994e-05	8.21129e-05
Tromethamine	Organic compounds	6.36517e-05	0.000320972	0.000313425	0.000303206	0.000295638	0.000306902	0.000322416	0.000281549	0.000290442	0.000327504	0.0002692	0.000299347	0.000316857	0.000288556	0.000287354	0.00030256	9.2486e-05	0.00028407
Hexadecanedioic acid mono-L-carnitine ester	Lipids and lipid-like molecules	3.58421e-07	2.04191e-08	1.98904e-08	3.1336e-07	1.85554e-08	7.11817e-06	2.10184e-06	1.49571e-06	2.85206e-06	2.1956e-06	4.33916e-06	1.10807e-06	1.27289e-06	2.42809e-06	3.21044e-07	1.36206e-06	7.91008e-07	1.42897e-06
Barringtogenol C	Lipids and lipid-like molecules	2.25273e-06	1.80131e-06	1.87674e-06	1.16423e-06	1.73042e-06	1.18618e-06	1.16048e-06	1.36275e-06	1.6184e-06	1.76484e-06	7.02995e-07	1.51477e-06	2.20216e-06	1.53642e-06	1.13323e-06	1.97733e-06	9.4865e-07	1.41708e-06
Methyl (2E,6Z)-dodecadienoate	Lipids and lipid-like molecules	1.5114e-05	1.48088e-05	1.08756e-05	1.08929e-05	1.9996e-05	1.77119e-05	1.48286e-05	9.59939e-06	1.3041e-05	1.50427e-05	1.61361e-05	1.42063e-05	8.92391e-06	7.15959e-06	7.72732e-06	1.02779e-05	1.42974e-05	1.89252e-05
LysoPC(16:1(9Z)/0:0)	Lipids and lipid-like molecules	0.000231839	5.28854e-05	0.000100571	4.24965e-05	0.000104719	4.28616e-05	2.29182e-05	0.000120857	0.000294433	6.87915e-05	4.53458e-05	0.000125582	5.19214e-05	7.09729e-05	0.000232721	0.000166272	0.0002416	0.000145107
PC(14:0/14:0)	Lipids and lipid-like molecules	7.36774e-06	2.04191e-08	8.29903e-07	4.27782e-06	6.25014e-06	3.82007e-06	2.22752e-06	3.56592e-06	5.08739e-06	1.92462e-06	5.04477e-07	4.78284e-06	5.18889e-06	1.27371e-06	2.21474e-06	3.24259e-06	1.88486e-08	5.79644e-06
N-[2-(4-Hydroxyphenyl)ethyl]benzamide	Benzenoids	3.02489e-06	4.4063e-06	4.35029e-06	3.65718e-06	5.46221e-06	4.75694e-06	5.06426e-06	4.77541e-06	4.84227e-06	5.03408e-06	7.20376e-06	4.36512e-06	4.35824e-06	4.42903e-06	4.72703e-06	4.18969e-06	4.65524e-06	4.14084e-06
PC(20:3(5Z,8Z,11Z)/20:3(5Z,8Z,11Z))	Lipids and lipid-like molecules	0.0103985	0.009394	0.0105764	0.00680202	0.00589088	0.00566098	0.0112169	0.00602675	0.00593319	0.00820315	0.00736958	0.00591522	0.00655592	0.00588973	0.0109152	0.011833	0.0148505	0.00545755
PC(22:5(4Z,7Z,10Z,13Z,16Z)/22:6(4Z,7Z,10Z,13Z,16Z,19Z))	Lipids and lipid-like molecules	2.87775e-05	1.9979e-05	2.00764e-05	1.78407e-05	1.85673e-05	2.13569e-05	3.08873e-05	5.09107e-05	6.23093e-05	4.85577e-05	4.06445e-05	4.67219e-05	3.37747e-05	3.81352e-05	4.2682e-05	3.4657e-05	4.57965e-05	5.07921e-05
Montecristin	Lipids and lipid-like molecules	1.06448e-05	0.000129617	0.000182608	5.47438e-05	4.79718e-06	1.38454e-05	2.70139e-06	6.54759e-06	1.86973e-05	6.87583e-05	4.58114e-05	4.12203e-06	1.80567e-05	2.20264e-05	0.000123845	3.31985e-05	0.000104354	1.84904e-05
5,6-Dihydrouridine	Organic oxygen compounds	5.28935e-06	6.19894e-05	2.77929e-05	4.8651e-05	3.87544e-05	4.91187e-05	4.85448e-05	4.41056e-05	1.28165e-05	5.21123e-05	3.18367e-05	7.06601e-05	3.51941e-05	5.5869e-05	4.37971e-05	5.95927e-05	3.04496e-05	4.83889e-05
Threoninyl-Leucine	Organic acids and derivatives	4.44108e-06	5.52492e-05	1.77722e-05	1.0874e-05	9.67091e-06	1.41243e-05	1.09076e-05	1.66545e-05	6.80357e-06	2.05323e-05	1.5669e-05	2.35344e-05	8.87716e-06	2.00528e-05	2.49457e-05	2.2025e-05	2.61744e-05	1.47141e-05
L-Histidine trimethylbetaine	Organic acids and derivatives	1.30245e-05	2.26862e-05	1.4164e-05	1.85239e-05	1.60898e-05	1.04304e-05	1.43876e-05	1.83782e-05	1.42831e-05	2.48652e-05	1.86918e-05	1.26602e-05	1.74273e-05	1.88268e-05	1.88082e-05	7.99633e-06	1.48273e-05	1.49562e-05
DG(16:0/20:4(8Z,11Z,14Z,17Z)/0:0)	Lipids and lipid-like molecules	4.16652e-05	9.12116e-05	6.7056e-05	5.12976e-05	5.39639e-05	3.29767e-05	5.79729e-05	4.51311e-05	2.35969e-05	5.92884e-05	4.99418e-05	4.57154e-05	5.5337e-05	6.05765e-05	6.03047e-05	3.64352e-05	5.61169e-05	3.09694e-05
LysoPC(17:0)	Lipids and lipid-like molecules	0.000216942	0.000133197	0.000102041	9.58834e-05	0.000135361	6.39653e-05	0.000130251	8.93728e-05	0.000112786	6.84356e-05	8.99212e-05	7.45136e-05	7.11479e-05	9.95905e-05	0.000162981	0.00010407	0.000169089	9.94019e-05
Se-Adenosylselenomethionine	Nucleosides, nucleotides, and analogues	8.82593e-07	3.5967e-06	2.66077e-06	1.79026e-06	3.2908e-06	2.44868e-06	3.43112e-06	1.64484e-06	1.9782e-06	2.43349e-06	2.89814e-06	2.80732e-06	5.6789e-06	3.19754e-06	1.23746e-06	4.15633e-06	2.75602e-06	3.73798e-06
PC(22:5(7Z,10Z,13Z,16Z,19Z)/20:4(5Z,8Z,11Z,14Z))	Lipids and lipid-like molecules	2.7976e-05	1.44092e-05	2.40963e-05	2.13858e-05	2.29263e-05	2.46843e-05	1.4313e-05	3.15956e-05	3.6891e-05	4.35596e-05	1.64646e-05	4.25713e-05	3.14416e-05	3.55132e-05	2.21044e-05	2.85702e-05	1.26841e-05	4.16922e-05
Acetylcholine	Organic nitrogen compounds	0.000159289	7.08955e-05	0.000152253	0.000469364	0.000117954	0.000204902	0.000116853	8.57952e-05	0.000109885	0.000130207	0.00032244	0.000140324	4.85659e-05	0.00019512	6.98163e-05	0.000285409	8.89885e-05	0.000135153
Isovalerylglycine	Organic acids and derivatives	1.03604e-05	1.64687e-05	1.3056e-05	1.31878e-05	1.0953e-05	1.92248e-05	1.64218e-05	1.05636e-05	9.87949e-06	8.05665e-06	7.00457e-06	8.83306e-06	1.02345e-05	8.87241e-06	1.62481e-05	1.66508e-05	8.48683e-06	8.85497e-06
CPA(18:0/0:0)	Lipids and lipid-like molecules	7.02206e-06	3.46051e-06	2.64934e-06	2.4095e-06	2.33614e-06	1.67993e-06	1.96061e-06	2.28607e-06	3.76499e-06	1.03691e-06	1.46403e-06	1.11444e-06	1.15718e-06	1.8922e-06	3.18385e-06	2.58596e-06	5.97156e-06	2.08643e-06
PC(22:6(4Z,7Z,10Z,13Z,16Z,19Z)/20:5(5Z,8Z,11Z,14Z,17Z))	Lipids and lipid-like molecules	2.48386e-06	2.04191e-08	1.98904e-08	1.29152e-06	5.52514e-06	1.90791e-08	4.53327e-06	5.89507e-06	1.8803e-08	1.99954e-08	2.98417e-06	4.71686e-06	4.80683e-06	5.72289e-06	3.88349e-06	2.86449e-06	1.88486e-08	6.78294e-06
DG(20:3(8Z,11Z,14Z)/18:3(6Z,9Z,12Z)/0:0)	Lipids and lipid-like molecules	1.08001e-05	2.46309e-05	1.86008e-05	1.28167e-05	1.281e-05	1.26797e-05	1.08759e-05	1.83973e-05	1.82719e-05	1.5802e-05	1.20631e-05	1.28622e-05	1.16775e-05	1.08881e-05	2.28596e-05	1.3917e-05	2.94845e-05	1.09681e-05
Aspartyl-Gamma-glutamate	Organic acids and derivatives	5.76687e-05	1.58338e-05	1.01611e-05	1.44926e-05	1.74986e-05	1.02987e-05	2.1403e-05	1.77484e-05	3.42349e-05	1.15006e-05	1.3609e-05	1.46289e-05	1.41575e-05	1.38852e-05	1.48729e-05	1.77011e-05	2.01915e-05	1.77082e-05
PC(18:2(9Z,12Z)/P-18:1(11Z))	Lipids and lipid-like molecules	4.62477e-05	6.97286e-05	7.3501e-05	7.06349e-05	5.54448e-05	9.81763e-05	7.27766e-05	6.62688e-05	5.63674e-05	6.67342e-05	8.34265e-05	6.17316e-05	4.72639e-05	5.4651e-05	7.63022e-05	6.66248e-05	5.13359e-05	4.38115e-05
PC(18:4(6Z,9Z,12Z,15Z)/18:2(9Z,12Z))		5.32924e-05	3.65992e-05	7.80455e-05	3.83591e-05	7.60111e-05	4.00167e-05	4.78149e-05	4.43716e-05	7.27743e-05	1.86526e-05	2.39748e-05	3.94752e-05	3.09435e-05	2.94027e-05	5.65212e-05	4.7746e-05	5.33045e-05	5.62851e-05
1-Hydroxy-3-methyl-9H-carbazole	Organoheterocyclic compounds	8.5171e-06	1.14598e-05	1.3578e-05	1.64653e-05	1.25831e-05	4.62533e-05	5.94173e-06	4.74866e-05	4.60187e-05	4.66583e-05	3.77933e-05	3.53296e-05	2.62412e-05	3.43389e-05	3.16536e-05	2.4907e-05	5.0202e-05	5.15088e-05
N-a-Acetylcitrulline	Organic acids and derivatives	7.79662e-06	1.65119e-05	1.04113e-05	3.6909e-06	7.42559e-06	7.85544e-06	6.89823e-06	1.27812e-05	5.84433e-06	8.47066e-06	7.87435e-06	1.44321e-05	4.95803e-06	9.41757e-06	1.29029e-05	1.34018e-05	1.61796e-05	7.53846e-06
Threoninyl-Methionine	Organic acids and derivatives	1.63382e-06	3.68097e-06	2.07494e-06	1.55655e-06	1.34013e-06	1.71561e-06	1.50885e-06	1.04875e-06	1.19845e-06	1.73907e-06	1.58184e-06	1.62649e-06	1.66097e-06	2.16114e-06	1.63517e-06	1.21253e-06	2.24951e-06	1.25461e-06
LysoPC(18:1(9Z))	Lipids and lipid-like molecules	0.00120427	0.000339534	0.000438709	0.000510918	0.00047927	0.000328709	0.000418946	0.000766556	0.00151951	0.00044838	0.00034299	0.000813558	0.000521648	0.000536276	0.00100158	0.000577284	0.00087858	0.000655002
1-Aminocyclopropanecarboxylic acid	Organic acids and derivatives	0.000230934	0.000243309	0.00025646	0.000229276	0.000341465	0.000189415	0.000268418	0.000257347	0.000267261	0.00015476	0.000234802	0.000172929	0.000199004	0.000182567	0.000305975	0.000159133	0.0002147	0.000328015
PI(20:2(11Z,14Z)/18:2(9Z,12Z))	Lipids and lipid-like molecules	3.35276e-05	3.55134e-05	4.5938e-05	4.21106e-05	3.56094e-05	4.23198e-05	3.95906e-05	3.95293e-05	3.82374e-05	4.10634e-05	3.57929e-05	3.70107e-05	3.79293e-05	2.58465e-05	3.53393e-05	4.09254e-05	2.89651e-05	4.02407e-05
23-Acetoxysoladulcidine	Lipids and lipid-like molecules	1.90378e-06	1.45181e-06	1.98904e-08	6.66682e-06	5.04828e-06	6.36758e-06	8.23955e-06	4.52488e-06	9.75239e-06	2.92889e-06	3.6301e-05	2.32951e-06	2.77501e-06	2.12806e-05	2.93425e-06	4.35081e-06	1.72648e-06	1.25648e-05
LysoPC(20:0/0:0)	Lipids and lipid-like molecules	0.000142969	0.000122139	6.97808e-05	6.10488e-05	0.000128792	2.54657e-05	6.54162e-05	5.82018e-05	5.54356e-05	3.04598e-05	3.18702e-05	2.85164e-05	3.75407e-05	4.85451e-05	6.4181e-05	4.91904e-05	5.27336e-05	4.45369e-05
Dihydro-2,4,6-tris(2-methylpropyl)-4h-1,3,5-dithiazine	Organosulfur compounds	1.36037e-05	1.82906e-05	5.97527e-06	3.57869e-06	7.01913e-06	1.09798e-05	1.25864e-05	9.46667e-06	9.55058e-06	8.11855e-06	4.42662e-06	1.13283e-05	2.38966e-05	1.14534e-05	9.3043e-06	6.24652e-06	9.1928e-06	7.51502e-06
Serylisoleucine	Organic acids and derivatives	1.64499e-06	2.7148e-06	2.14416e-06	2.70148e-06	2.21995e-06	3.54605e-06	1.55139e-06	2.69512e-06	2.17316e-06	3.5046e-06	3.04488e-06	4.31696e-06	2.9401e-06	3.12809e-06	3.91912e-06	1.68271e-06	2.77184e-06	3.40024e-06
Monocrotaline	Organoheterocyclic compounds	1.25505e-07	1.71302e-06	3.73877e-06	5.85468e-06	5.34004e-06	7.29651e-07	3.01309e-06	1.49967e-06	2.24223e-06	1.00916e-06	1.38623e-06	2.43204e-06	7.87122e-07	9.91241e-07	6.04755e-07	3.74124e-07	7.38457e-07	2.92321e-07
Glucoconringiin	Organooxygen compounds	2.84542e-07	1.5005e-06	1.93961e-06	2.86754e-06	1.73581e-06	2.84356e-06	1.0442e-06	1.07822e-06	1.23671e-06	2.32028e-06	1.47484e-06	2.19288e-06	9.68359e-07	1.86373e-06	2.13241e-06	8.80804e-07	1.76144e-06	1.42977e-06
Theaspirone A	Organic oxygen compounds	3.73942e-05	3.39791e-05	3.58414e-05	3.16645e-05	0.000106319	3.60931e-05	3.66267e-05	3.10566e-05	3.47697e-05	3.82451e-05	3.30892e-05	3.57281e-05	3.38844e-05	4.80993e-05	3.1849e-05	3.9703e-05	3.78825e-05	2.97219e-05
6,10,14-Trimethyl-5,9,13-pentadecatrien-2-one	Lipids and lipid-like molecules	2.08202e-05	2.65109e-05	2.56612e-05	2.08386e-05	2.28818e-05	1.72088e-05	2.09169e-05	1.88892e-05	1.78424e-05	2.88639e-05	2.3169e-05	1.76372e-05	2.06649e-05	2.08212e-05	2.14657e-05	2.09856e-05	1.44821e-05	1.55387e-05
PC(18:3(6Z,9Z,12Z)/P-18:1(11Z))	Lipids and lipid-like molecules	0.000271987	0.000359521	0.000341792	0.000308696	0.000257479	0.000539069	0.000364936	0.000393251	0.000389257	0.000404546	0.000371732	0.000358946	0.000473333	0.000321298	0.000411442	0.000421796	0.00041571	0.000386882
Phenylalanyl-Gamma-glutamate	Organic acids and derivatives	5.96363e-06	5.83126e-06	4.3255e-06	9.16137e-07	1.63018e-06	2.18735e-06	1.97521e-06	3.24001e-06	2.67012e-06	2.82915e-06	1.68379e-06	2.90403e-06	8.18452e-07	3.42909e-06	6.14645e-06	7.01862e-06	1.1754e-05	1.89479e-06
Serylthreonine	Organic acids and derivatives	7.08516e-06	1.03906e-05	6.76385e-06	3.68743e-06	6.93847e-06	6.12596e-06	6.12562e-06	7.49714e-06	4.91022e-06	5.83964e-06	5.3418e-06	8.3614e-06	3.11028e-06	7.45921e-06	7.99497e-06	8.62246e-06	1.15312e-05	6.51013e-06
Yuccaol C	Phenylpropanoids and polyketides	1.81845e-08	2.04191e-08	1.46045e-07	1.99001e-08	1.89445e-07	8.24719e-07	1.76168e-08	5.73008e-07	4.98327e-07	1.60231e-06	6.72034e-07	5.15016e-06	2.11527e-06	2.34455e-06	1.6068e-06	2.2653e-07	2.54741e-07	5.66842e-07
Serylhistidine	Organic acids and derivatives	1.73223e-05	2.76189e-06	1.88312e-06	2.27136e-06	2.97396e-06	5.81909e-07	4.42411e-06	5.67698e-06	8.30757e-06	2.14444e-06	3.0693e-06	1.3624e-06	2.24859e-06	1.51819e-06	3.24536e-06	5.59573e-06	6.83524e-06	2.71125e-06
LysoPC(20:4(8Z,11Z,14Z,17Z))		0.00050332	0.000107985	0.000100987	6.76508e-05	0.000137237	0.000144744	0.000114702	0.000301515	0.000509358	0.000130787	0.000119157	0.000312631	0.000157501	0.000185609	0.000368673	0.000268214	0.000399001	0.000275168
Dimethyl 2-galloylgalactarate	Organic oxygen compounds	2.52353e-07	1.31433e-06	1.5203e-06	1.92292e-06	1.53652e-06	2.76011e-06	9.16011e-07	1.13359e-06	4.90518e-07	2.40259e-06	2.00329e-06	1.67064e-06	3.86147e-07	2.17614e-06	1.7335e-06	7.22973e-07	1.96373e-06	1.39941e-06
LysoPC(22:6(4Z,7Z,10Z,13Z,16Z,19Z))	Lipids and lipid-like molecules	0.00430274	0.000628897	0.000696603	0.000389274	0.00107044	0.000565642	0.000655846	0.00150508	0.0025497	0.000665298	0.000469835	0.00118872	0.000531865	0.00111185	0.00177838	0.00127485	0.00199234	0.00109751
DG(22:4(7Z,10Z,13Z,16Z)/18:3(6Z,9Z,12Z)/0:0)	Lipids and lipid-like molecules	2.08128e-05	1.60799e-06	1.36963e-05	1.14109e-05	1.41907e-05	1.69501e-05	1.85812e-05	3.65197e-05	3.97152e-05	2.07564e-05	1.64513e-05	1.83077e-05	1.56879e-05	1.71914e-05	3.37049e-05	1.93141e-05	4.21313e-05	1.81346e-05
Phenylalanyl-Threonine	Organic acids and derivatives	8.16889e-06	6.08277e-06	3.55326e-06	1.37569e-06	2.41384e-06	2.14804e-06	2.50673e-06	4.12625e-06	3.38948e-06	3.47153e-06	2.29915e-06	3.49104e-06	1.89676e-06	4.29954e-06	7.51689e-06	6.8368e-06	5.68825e-06	3.37105e-06
Nelumboside	Phenylpropanoids and polyketides	4.10723e-06	6.35317e-07	1.622e-06	4.33742e-07	1.14899e-06	9.21248e-07	4.92192e-07	1.52602e-06	3.07324e-06	6.58719e-07	4.28984e-07	4.77416e-07	1.99052e-08	1.33577e-06	2.53729e-06	1.42392e-06	3.60267e-06	4.6703e-07
alpha-Tocopherolquinone	Lipids and lipid-like molecules	3.41333e-07	7.01418e-07	1.10561e-06	6.08631e-07	3.15442e-07	1.18002e-06	1.1491e-06	8.01953e-07	8.36308e-07	9.65025e-07	9.00425e-07	4.64771e-07	1.31316e-05	6.99362e-07	1.03651e-06	6.00888e-07	2.07767e-06	8.92533e-07
6''-O-p-Coumaroyltrifolin	Phenylpropanoids and polyketides	4.60769e-07	1.63652e-06	2.06011e-06	8.09982e-07	1.40424e-06	1.25744e-06	4.5074e-07	1.72589e-06	3.36814e-06	2.32788e-06	1.40148e-06	1.36455e-06	1.27634e-07	1.32974e-06	4.46861e-06	1.05887e-06	3.02289e-06	1.02497e-06
7-Azaindolizine	Organoheterocyclic compounds	0.000117032	0.000132606	0.000106234	0.000123016	0.000140343	0.000141859	0.00014015	0.000129934	0.000123349	0.000128257	0.000178477	0.000130863	0.00012424	0.000115004	0.000134034	0.000122765	0.00022389	0.000111396
6-Epi-7-isocucurbic acid glucoside	Lipids and lipid-like molecules	2.61229e-06	1.15572e-05	7.06928e-06	1.32571e-05	9.83424e-06	2.10799e-05	1.37363e-05	1.13457e-05	7.33344e-06	1.3525e-05	1.53918e-05	1.22978e-05	1.07641e-05	1.20688e-05	1.14549e-05	8.34046e-06	7.72474e-06	1.19216e-05
LysoPI(18:0/0:0)	Lipids and lipid-like molecules	6.14617e-05	3.11887e-05	2.24763e-05	1.30782e-05	1.93753e-05	7.2187e-06	1.04223e-05	1.76821e-05	2.98985e-05	7.67032e-06	8.76372e-06	6.9684e-06	8.55155e-06	1.30165e-05	2.39385e-05	2.52739e-05	5.29543e-05	1.49249e-05
Phlorisobutyrophenone 2-glucoside	Organic oxygen compounds	5.98023e-06	6.19328e-06	6.01026e-06	6.57723e-06	4.96586e-06	5.92227e-06	6.35829e-06	7.05151e-06	8.31303e-06	7.27263e-06	5.56764e-06	6.55192e-06	6.45228e-06	4.85216e-06	4.3222e-06	3.55589e-06	1.42861e-06	6.84221e-06
Eujambolin	Phenylpropanoids and polyketides	2.97953e-06	4.40121e-06	2.24359e-06	3.44303e-06	3.22442e-06	3.35814e-06	6.14399e-06	2.84546e-06	3.96333e-06	4.05092e-06	4.17405e-06	2.50995e-06	2.55794e-06	1.38574e-06	2.93635e-06	3.63861e-06	3.90591e-06	5.4331e-06
(3beta,5alpha,6beta,22E,24R)-23-Methylergosta-7,22-diene-3,5,6-triol	Lipids and lipid-like molecules	6.62153e-05	3.05379e-05	3.66924e-05	2.14236e-05	1.31374e-05	3.20884e-05	7.52893e-07	2.87135e-05	3.95885e-05	3.03383e-05	3.11753e-05	2.09872e-05	0.000112578	2.43743e-05	3.82077e-05	2.59841e-05	6.65586e-05	2.47106e-05
3-(4-Hydroxyphenyl)-1-propanol	Benzenoids	9.10023e-06	4.26157e-06	4.93056e-06	4.56494e-06	1.46421e-05	6.16159e-06	3.56016e-05	7.83352e-06	1.20351e-05	1.66145e-05	8.63776e-06	1.01938e-05	1.35255e-05	3.49929e-06	4.9838e-06	7.94815e-06	4.40814e-06	1.33396e-05
Dieporeticenin	Lipids and lipid-like molecules	2.20644e-06	4.19487e-06	5.10313e-06	3.35405e-06	2.64745e-06	3.36864e-06	1.87179e-06	3.11345e-06	2.86201e-06	6.96083e-06	2.11973e-06	5.58262e-06	4.18942e-06	4.34515e-06	4.91595e-06	9.35966e-06	4.57672e-06	3.7917e-06
Thioguanine	Organoheterocyclic compounds	2.26912e-06	2.04191e-08	1.98904e-08	1.99001e-08	1.67403e-05	6.66326e-06	9.21757e-06	1.40693e-05	3.17375e-06	1.99954e-08	1.75738e-08	1.05866e-05	5.40566e-06	2.04085e-06	1.78742e-08	1.91191e-08	1.88486e-08	3.21612e-06
6alpha-Hydroxymaackiain	Phenylpropanoids and polyketides	1.4059e-06	2.56453e-06	1.60757e-06	2.0217e-06	1.38856e-06	1.23817e-06	1.8077e-06	2.20568e-06	1.2021e-06	2.02386e-06	1.82711e-06	1.8429e-06	1.35458e-06	2.42894e-06	1.73599e-06	1.42424e-06	2.09512e-06	1.7667e-06
Molybdopterin precursor Z	Organoheterocyclic compounds	1.81845e-08	9.12438e-06	5.14942e-06	1.29783e-05	1.01742e-05	9.45321e-06	8.47218e-06	7.7356e-06	5.00106e-06	8.21568e-06	1.02198e-05	9.2423e-06	4.16232e-06	8.08175e-06	5.72514e-06	5.51612e-06	4.98822e-06	7.43444e-06
[10]-Paradol	Benzenoids	3.11684e-05	2.20811e-05	2.2538e-05	2.92849e-05	2.21055e-05	1.13503e-05	2.40558e-05	2.24708e-05	1.58648e-05	1.88079e-05	2.37436e-05	1.98208e-05	2.2018e-05	2.53682e-05	3.04561e-05	1.84631e-05	1.99318e-05	1.86607e-05
D-erythro-D-galacto-octitol	Organooxygen compounds	9.20912e-06	9.55536e-06	1.00987e-05	1.06113e-05	1.0218e-05	8.8297e-06	1.14417e-05	1.03078e-05	1.01152e-05	8.08496e-06	7.74241e-06	8.08521e-06	9.33455e-06	9.40998e-06	8.24399e-06	1.03912e-05	8.9567e-06	8.98942e-06
Valyl-Gamma-glutamate	Organic acids and derivatives	0.000132365	1.03289e-05	8.85197e-05	5.62229e-06	3.81266e-06	4.5428e-06	1.20936e-05	8.56714e-06	0.000471017	3.03397e-06	9.4652e-07	8.79351e-06	1.07156e-06	2.20563e-05	8.71882e-05	2.17631e-05	0.000292805	1.80543e-05
[12]-Gingerol	Benzenoids	1.63188e-05	1.04861e-05	1.83921e-05	0.000144752	6.4506e-05	0.000642675	0.000658079	7.03612e-05	0.000166858	0.000236067	0.0013383	0.000179523	0.000159152	0.000513567	4.37917e-05	6.01802e-05	3.51615e-05	0.000210802
N(6)-(1,2-dicarboxyethyl)AMP	Nucleosides, nucleotides, and analogues	3.83918e-06	8.28663e-06	1.01952e-05	1.02163e-05	1.20296e-05	1.67039e-05	1.00854e-05	1.43558e-05	1.17612e-05	1.51716e-05	1.41864e-05	1.59097e-05	8.42208e-06	1.20868e-05	1.12546e-05	7.24941e-06	9.89439e-06	9.80222e-06
N-(3-Methylbutyl)acetamide	Organic acids and derivatives	1.7142e-05	1.49488e-05	1.68183e-05	2.01907e-05	1.93458e-05	3.96109e-05	2.60117e-05	1.69215e-05	1.47858e-05	1.55296e-05	1.47749e-05	2.10554e-05	1.55597e-05	1.78121e-05	1.91574e-05	2.19543e-05	1.15607e-05	1.58091e-05
Dihydroprudomenin	Phenylpropanoids and polyketides	1.65071e-06	2.17899e-06	1.86808e-05	2.36691e-07	3.97712e-06	3.87338e-06	6.59726e-07	3.00496e-06	1.42485e-05	8.28271e-06	1.19377e-06	5.61328e-06	3.66565e-07	2.67441e-06	1.76753e-05	1.85038e-06	1.67452e-05	1.61069e-06
4-Aminohippuric acid	Benzenoids	6.64815e-05	8.04932e-05	6.8463e-05	7.1672e-05	6.88512e-05	7.26528e-05	6.3304e-05	6.43885e-05	6.20059e-05	7.7005e-05	6.7326e-05	7.88483e-05	7.01492e-05	6.70117e-05	7.00788e-05	6.69336e-05	6.87735e-05	6.78268e-05
5'-Hydroxymethyl meloxicam	Organoheterocyclic compounds	1.07909e-05	7.43463e-06	1.58134e-05	4.69907e-06	1.19512e-05	6.45508e-06	5.66889e-06	1.02835e-05	1.6925e-05	1.04795e-05	6.44897e-06	6.84241e-06	3.52667e-06	6.87672e-06	1.3233e-05	8.61944e-06	1.66097e-05	7.61583e-06
3,5,6-Trihydroxy-5-(hydroxymethyl)-2-methoxy-2-cyclohexen-1-one	Organic oxygen compounds	3.14074e-05	3.2464e-05	1.68627e-05	2.73858e-05	3.00674e-05	1.72358e-05	2.05139e-05	3.03443e-05	2.31223e-05	1.96066e-05	2.88971e-05	2.07529e-05	2.15336e-05	1.55905e-05	2.54776e-05	2.56439e-05	2.4347e-05	3.14612e-05
Gravacridonetriol	Organoheterocyclic compounds	9.72665e-06	3.87493e-05	3.13608e-05	2.8384e-05	2.98827e-05	4.14194e-05	2.69656e-05	3.45397e-05	2.84999e-05	3.24585e-05	3.44385e-05	3.67668e-05	3.8281e-05	3.74806e-05	2.29787e-05	3.26353e-05	2.65878e-05	3.80386e-05
Tryptophyl-Isoleucine	Organic acids and derivatives	4.32151e-07	7.61139e-06	3.00543e-06	5.68549e-06	4.86219e-06	4.37434e-06	4.37909e-06	5.9838e-06	1.91773e-06	4.4366e-06	5.38887e-06	1.249e-05	5.29763e-06	6.92601e-06	3.95611e-06	3.66198e-06	3.14359e-06	6.22999e-06
Ginkgotoxin	Organoheterocyclic compounds	2.55243e-05	2.79764e-05	4.58876e-05	2.89856e-05	2.97764e-05	5.45996e-05	3.2322e-05	5.87621e-05	5.66757e-05	7.32264e-05	8.70663e-05	7.69605e-05	7.11792e-05	6.24642e-05	7.74327e-05	5.14008e-05	6.2474e-05	3.90383e-05
S-Formylglutathione	Organic acids and derivatives	9.0497e-07	1.59972e-05	7.4403e-06	1.16886e-05	1.45139e-05	1.10232e-05	8.75048e-06	9.16076e-06	6.08222e-06	1.25947e-05	1.77945e-05	9.54571e-06	1.28267e-05	7.90173e-06	9.99146e-06	1.46965e-05	3.8827e-06	8.07011e-06
Betaine	Organic acids and derivatives	2.52605e-06	3.06357e-06	3.27752e-06	3.81136e-06	2.95647e-06	3.16433e-06	2.98854e-06	2.88757e-06	2.98278e-06	3.40202e-06	2.737e-06	3.00417e-06	3.49393e-06	2.59871e-06	2.76044e-06	2.75328e-06	2.96404e-06	2.79887e-06
Hexylamine	Organonitrogen compounds	7.9928e-05	9.1214e-05	8.09326e-05	8.01085e-05	0.000175371	8.09852e-05	6.98099e-05	7.30434e-05	7.53801e-05	8.95999e-05	7.30898e-05	8.35176e-05	8.54579e-05	7.90885e-05	6.93629e-05	7.61503e-05	7.79334e-05	7.93261e-05
Glycine	Organic acids and derivatives	1.37317e-05	1.39385e-05	8.66456e-06	1.19941e-05	1.43857e-05	7.02582e-06	8.6391e-06	7.53746e-06	7.37602e-06	7.13582e-06	1.39011e-05	6.90251e-06	7.95431e-06	5.18375e-06	9.41581e-06	1.0929e-05	8.71849e-06	7.2701e-06
Isoleucyl-Threonine	Organic acids and derivatives	4.80739e-06	2.2028e-06	3.18366e-06	6.64375e-06	8.41561e-06	1.34526e-05	8.28223e-06	6.96136e-06	2.79482e-06	6.23087e-06	6.84879e-06	7.91585e-06	3.41586e-06	6.03043e-06	6.06543e-06	1.19351e-05	3.13188e-06	6.01561e-06
PE(P-18:1(11Z)/18:3(6Z,9Z,12Z))	Lipids and lipid-like molecules	8.43756e-06	6.11738e-06	3.85873e-06	1.22788e-05	2.49555e-06	6.31261e-06	3.60102e-06	6.11076e-06	2.86967e-06	5.50457e-06	3.90022e-06	2.92679e-06	8.01334e-06	4.96544e-06	2.74551e-06	1.01024e-05	1.38149e-06	4.88218e-06
PE(20:5(5Z,8Z,11Z,14Z,17Z)/18:1(11Z))	Lipids and lipid-like molecules	0.000415353	0.00045594	0.000569633	0.00102648	0.000196081	0.000506979	0.000379192	0.000772874	0.000267976	0.000374884	0.000375611	0.000951433	0.000462255	0.000846896	0.000434153	0.000542855	0.000390353	0.000867162
S-Carboxymethyl-L-cysteine	Organic acids and derivatives	1.05699e-05	2.04191e-08	1.98904e-08	6.21137e-06	3.60654e-05	1.25262e-05	1.06156e-05	2.42838e-05	1.44283e-05	2.37609e-06	2.47637e-06	3.32636e-05	1.36325e-05	1.39505e-05	1.78742e-08	5.76059e-06	7.3783e-06	1.32115e-05
3-(2-Methylpropanoyloxy)-8-(3-methylbutanoyloxy)-9,10-epoxy-p-mentha-1,3,5-triene	Benzenoids	5.49488e-07	7.30447e-07	5.87631e-07	7.17806e-07	6.06946e-07	9.03511e-07	5.56677e-07	6.46658e-07	6.34751e-07	8.7385e-07	8.00549e-07	7.19427e-07	8.46437e-07	8.24329e-07	8.68558e-07	8.22819e-07	5.62243e-07	8.5309e-07
3-Phenylpropyl cinnamate	Phenylpropanoids and polyketides	3.91216e-06	4.85859e-06	6.40127e-06	5.68123e-06	5.60117e-06	6.35504e-06	4.7731e-06	4.00285e-06	4.6175e-06	6.95355e-06	2.12675e-06	3.19933e-06	2.53914e-06	3.62667e-06	3.73871e-06	3.2117e-06	6.41159e-06	3.29551e-06
Fagomine	Organoheterocyclic compounds	1.28987e-05	1.64151e-05	6.1058e-05	1.16716e-05	2.18761e-05	0.000103594	3.0381e-05	1.78287e-05	2.61649e-05	7.35099e-05	7.90514e-06	4.64255e-05	4.7811e-05	3.11561e-05	4.30943e-05	3.04677e-05	5.03005e-05	3.51862e-05
DG(22:5(7Z,10Z,13Z,16Z,19Z)/18:3(6Z,9Z,12Z)/0:0)	Lipids and lipid-like molecules	1.97301e-05	2.74576e-05	1.00902e-05	5.38583e-06	2.00723e-05	1.06239e-05	2.23285e-05	2.45109e-05	2.30041e-05	9.78324e-06	1.15731e-05	1.02281e-05	1.0569e-05	1.04126e-05	2.31448e-05	1.25566e-05	1.91215e-05	9.92974e-06
5-Aminoimidazole ribonucleotide	Organic oxygen compounds	8.24177e-05	0.000355195	0.000241376	0.000247866	0.000362683	0.000263871	0.000221952	0.000282095	0.000225806	0.000308471	0.000358485	0.000289232	0.00034099	0.000222031	0.000338497	0.000243864	0.000183193	0.000233194
PI(20:3(5Z,8Z,11Z)/16:0)	Lipids and lipid-like molecules	7.12564e-07	2.01741e-06	4.96551e-06	6.15079e-06	4.97792e-06	3.41087e-06	2.4892e-06	2.82554e-06	3.04195e-06	5.25205e-06	5.22701e-06	7.61158e-06	9.15226e-06	5.44074e-06	2.55529e-06	2.74345e-06	6.79194e-07	4.06703e-06
N-[(4E,8E)-1,3-dihydroxyoctadeca-4,8-dien-2-yl]hexadecanamide	Lipids and lipid-like molecules	4.93404e-05	2.02158e-05	2.57763e-05	1.07622e-05	1.262e-05	1.9435e-05	6.53814e-06	1.52179e-05	1.96644e-05	1.98912e-05	2.15191e-05	1.29886e-05	1.13558e-05	1.84165e-05	2.51159e-05	4.66306e-05	4.33363e-05	1.34435e-05
Adenosine phosphosulfate	Nucleosides, nucleotides, and analogues	1.6689e-06	4.16118e-07	2.13438e-06	3.6754e-07	1.10697e-06	1.63439e-07	3.66435e-07	1.04166e-06	2.21016e-06	9.77276e-07	4.58662e-07	5.05885e-07	9.24599e-08	1.57834e-07	2.34735e-06	6.32359e-07	1.98276e-06	5.87074e-07
Cer(d18:1/18:1(11Z))	Lipids and lipid-like molecules	3.07582e-05	2.25948e-05	2.99359e-05	1.32253e-05	1.16613e-05	2.9323e-05	8.94106e-06	1.9245e-05	2.35952e-05	2.85412e-05	2.69091e-05	2.23821e-05	2.45216e-05	2.29506e-05	3.59923e-05	4.98279e-05	5.80535e-05	1.76327e-05
Avenalumin III	Organoheterocyclic compounds	2.06376e-06	6.00485e-06	3.66288e-06	4.17714e-06	1.82562e-06	1.49663e-06	1.79176e-06	2.70211e-06	1.69193e-06	4.24462e-06	3.32411e-06	1.72171e-06	2.55895e-06	3.87099e-06	3.5204e-06	1.61499e-06	3.14401e-06	2.17051e-06
2,2,6,6-Tetramethyl-4-piperidinone	Organoheterocyclic compounds	6.39736e-06	5.65916e-06	4.94911e-06	5.46928e-06	8.38742e-06	6.55743e-06	7.0926e-06	5.22782e-06	5.43554e-06	6.059e-06	1.06905e-05	6.12694e-06	6.26816e-06	4.54434e-06	4.28958e-06	5.67976e-06	5.1436e-06	7.67665e-06
Vinylacetylglycine	Organic acids and derivatives	2.57115e-05	2.72198e-05	3.15473e-05	3.13606e-05	2.63148e-05	2.82274e-05	2.24159e-05	4.05746e-05	2.72155e-05	2.30266e-05	2.13039e-05	2.42328e-05	2.38754e-05	2.55247e-05	2.18874e-05	4.18841e-05	4.69139e-05	2.22165e-05
Stearidonyl carnitine	Lipids and lipid-like molecules	1.01931e-06	3.22489e-06	2.68872e-06	5.28642e-06	3.33343e-06	1.51836e-05	1.15695e-05	3.29296e-06	3.6794e-06	5.29175e-06	1.3094e-05	5.01148e-06	4.68113e-06	1.09314e-05	4.23913e-06	2.83101e-06	1.84348e-06	6.46855e-06
dIMP	Nucleosides, nucleotides, and analogues	6.04635e-06	4.3546e-06	4.70225e-06	4.05069e-06	5.16225e-06	3.33991e-06	5.08183e-06	4.13927e-06	5.5132e-06	3.11683e-06	4.29042e-06	2.64627e-06	4.40219e-06	3.31369e-06	5.45311e-06	3.1091e-06	4.00662e-06	7.07792e-06
PE(16:0/20:4(5Z,8Z,11Z,14Z))	Lipids and lipid-like molecules	5.951e-05	5.31541e-05	5.44536e-05	8.04406e-05	7.35646e-05	9.50936e-05	5.71601e-05	7.65649e-05	8.15076e-05	0.000104339	8.26742e-05	0.000146952	0.000163991	9.30218e-05	7.65534e-05	9.76017e-05	0.000105636	0.00012844
3,5-Dichloro-4-hydroxy-2-methoxy-6-methylbenzoic acid	Benzenoids	9.7633e-07	9.05462e-07	9.70144e-07	4.58494e-07	8.62335e-07	1.28565e-06	7.67446e-07	1.08727e-06	2.35271e-07	1.04236e-06	1.10944e-06	1.01719e-06	1.03114e-06	1.18902e-06	8.39056e-07	8.36349e-07	1.06708e-06	5.95449e-07
Vignatic acid A	Organic acids and derivatives	2.6627e-05	3.13935e-05	4.47506e-05	1.31043e-05	3.08809e-05	1.58146e-05	2.35218e-05	2.35294e-05	2.22644e-05	1.31591e-05	7.01232e-06	2.28503e-05	1.93055e-05	1.53567e-05	1.16922e-05	2.09538e-05	6.05601e-06	1.53801e-05
PE(18:0/22:6(4Z,7Z,10Z,13Z,16Z,19Z))	Lipids and lipid-like molecules	0.000145526	0.000956139	0.00102133	0.00042387	1.80051e-05	0.000181658	3.32937e-05	5.86294e-05	0.00021976	0.000697127	0.0005511	8.95426e-06	0.000137796	0.000272122	0.000658684	0.000309368	0.00144553	0.000207633
1,3,5-Trihydroxybenzene	Benzenoids	4.26969e-06	7.32583e-05	5.89357e-05	3.69989e-05	1.84301e-05	0.000263502	1.0688e-05	1.9911e-05	7.2192e-05	0.000276818	6.92612e-05	0.000242861	5.80328e-05	0.000193313	0.000203424	1.96929e-05	0.000131841	8.53434e-05
3-O-Methylcoumestrol	Phenylpropanoids and polyketides	9.75398e-05	0.000175085	0.000131527	0.00013021	8.70609e-05	7.14081e-05	7.89363e-05	8.57762e-05	7.09584e-05	0.000156087	8.71684e-05	8.50686e-05	0.00011773	0.000172291	9.39785e-05	8.31063e-05	0.000177049	0.000112237
3-Methylbutyl glucosinolate	Organic oxygen compounds	8.35996e-06	1.18163e-05	1.63127e-05	1.44125e-05	1.86852e-05	1.30463e-05	1.52186e-05	1.93312e-05	1.72185e-05	1.40287e-05	1.55609e-05	1.3782e-05	1.10973e-05	8.57586e-06	1.09494e-05	1.19875e-05	1.44138e-05	1.29664e-05
Benzoyl glucuronide (Benzoic acid)	Organic oxygen compounds	8.14873e-06	2.53046e-05	1.16252e-05	1.99296e-05	1.45612e-05	8.04089e-06	1.0185e-05	1.70543e-05	1.00671e-05	2.05796e-05	1.62123e-05	1.23921e-05	1.1569e-05	1.61862e-05	9.35286e-06	9.92746e-06	1.47125e-05	1.48912e-05
PE(22:6(4Z,7Z,10Z,13Z,16Z,19Z)/P-16:0)	Lipids and lipid-like molecules	9.05062e-05	0.000129198	0.000165645	0.000100563	8.17199e-05	8.31407e-05	6.7825e-05	7.77884e-05	7.55126e-05	0.000121836	7.40484e-05	8.39057e-05	8.94766e-05	8.20844e-05	7.97413e-05	0.000104439	8.61964e-05	7.62334e-05
Gymnodimine		5.30881e-05	1.17178e-05	1.93943e-05	6.06537e-06	2.22316e-05	3.26093e-06	3.86752e-06	9.35914e-06	1.94903e-05	5.11567e-06	1.73737e-06	9.50863e-06	4.14125e-06	6.66517e-06	2.05292e-05	1.3545e-05	2.7224e-05	1.25393e-05
Lipoamide	Organoheterocyclic compounds	1.61248e-05	1.47658e-05	1.08807e-05	1.65484e-05	1.4154e-05	1.22372e-05	9.91717e-06	1.48862e-05	1.49002e-05	1.1803e-05	9.97538e-06	1.1383e-05	1.13337e-05	1.06716e-05	1.22927e-05	1.16581e-05	1.03576e-05	1.33617e-05
Ecgonine methyl ester	Alkaloids and derivatives	9.37966e-06	1.76576e-05	1.21445e-05	1.19125e-05	7.81562e-06	9.15005e-06	1.27713e-05	9.95252e-06	1.10811e-05	1.27283e-05	9.69409e-06	9.10504e-06	9.04491e-06	1.07664e-05	1.28176e-05	8.73126e-06	1.29681e-05	9.59579e-06
Boviquinone 4	Lipids and lipid-like molecules	6.20059e-06	5.72617e-06	9.51201e-06	2.83828e-06	6.75584e-06	5.12272e-06	6.20926e-06	5.46262e-06	5.53619e-06	2.79515e-06	3.88017e-07	6.00509e-06	4.38495e-06	2.71806e-06	2.54118e-06	2.57523e-06	6.30868e-06	3.70513e-06
1-eicosanoyl-glycero-3-phosphate	Lipids and lipid-like molecules	3.27078e-06	1.05089e-05	1.96578e-05	6.64528e-06	3.26576e-06	1.34294e-06	1.39087e-06	1.61468e-06	2.66657e-06	2.42323e-06	1.30657e-06	5.24016e-07	9.10882e-07	1.07691e-06	5.23248e-06	1.91191e-08	8.59661e-06	8.36586e-07
PI(22:5(4Z,7Z,10Z,13Z,16Z)/16:0)	Lipids and lipid-like molecules	4.40624e-06	4.61582e-06	6.08758e-06	7.34507e-07	1.04884e-05	7.03189e-06	5.39542e-06	8.01032e-06	8.75169e-06	1.02675e-05	1.00762e-05	1.29259e-05	1.42746e-05	8.75143e-06	5.7169e-06	8.44075e-06	3.92881e-06	9.06948e-06
PC(18:3(6Z,9Z,12Z)/15:0)	Lipids and lipid-like molecules	1.67503e-05	2.04191e-08	1.98904e-08	1.49463e-05	2.0675e-05	2.78838e-05	2.09871e-05	2.04049e-05	2.35874e-05	2.67843e-05	2.36481e-05	5.51961e-05	5.76844e-05	2.92313e-05	6.72446e-06	1.87433e-05	1.88486e-08	3.53775e-05
PI(20:3(5Z,8Z,11Z)/20:3(5Z,8Z,11Z))	Lipids and lipid-like molecules	4.17684e-06	2.72327e-06	3.26808e-06	3.48931e-06	4.0731e-06	4.64276e-06	8.26284e-06	4.01925e-06	5.05726e-06	4.91876e-06	5.76376e-06	4.96221e-06	4.31654e-06	5.26251e-06	1.34966e-06	5.68505e-06	4.74023e-06	4.18165e-06
3-Carboxy-1-hydroxypropylthiamine diphosphate	Organoheterocyclic compounds	1.81845e-08	1.39698e-06	1.34316e-06	1.91081e-06	1.73901e-06	1.59186e-06	1.60351e-06	1.03449e-06	6.08604e-07	2.10108e-06	1.67437e-06	1.99132e-06	1.43183e-06	1.78654e-06	1.12463e-06	8.51959e-07	3.9485e-07	1.32748e-06
(2E,4E)-2,4-Dodecadienal	Organic oxygen compounds	6.7067e-06	2.15391e-06	2.29961e-06	2.36683e-06	1.25032e-05	5.34191e-06	8.79806e-06	5.63688e-06	4.40887e-06	6.78794e-06	6.26415e-06	6.1844e-06	2.62045e-06	1.31672e-06	3.02509e-06	3.99724e-06	3.97109e-06	9.99272e-06
1-Methylpyrrolo[1,2-a]pyrazine	Organoheterocyclic compounds	0.0020884	0.00236209	0.00217991	0.00233217	0.00222025	0.00233175	0.00199824	0.00224463	0.00232138	0.00247571	0.00230889	0.00249713	0.00241372	0.00220216	0.00231335	0.0021011	0.00230302	0.00226297
Pyrohyperforin	Lipids and lipid-like molecules	3.0234e-06	5.33185e-06	1.27043e-05	4.75217e-06	1.73807e-06	1.9003e-06	1.38689e-06	1.91664e-06	2.76431e-06	2.19428e-06	1.30028e-06	9.94357e-07	1.10224e-06	1.93875e-06	2.64273e-06	1.53061e-06	3.93245e-06	1.15777e-06
