# Supplementary material for: Metabolomics study reveals the alteration of fatty acid oxidation in the hearts of diabetic mice by empagliflozin
Source: Royal Society of Chemistry journal article supplement (doi:10.1039/d2mo00036a), 2022-04-22
Supplement: d2mo00036a2.xlsx [file d2mo00036a2.xlsx]

## Sheet: Sheet1
Supplementary table S2-The relative expression level of annotated metabolites in negative ion mode.
Compound	SuperClass	db/m-1	db/m-2	db/m-3	db/m-4	db/m-5	db/db-1	db/db-2	db/db-3	db/db-4	db/db-5	db/db-6	db/db-Empa-1	db/db-Empa-2	db/db-Empa-3	db/db-Empa-4	db/db-Empa-5	db/db-Empa-6	db/db-Empa-7
Itaconic acid	Lipids and lipid-like molecules	0.000302761	0.000133331	0.000115928	9.43691e-05	0.00023145	9.55109e-05	0.000104799	8.89649e-05	5.02809e-05	4.10651e-05	0.00024448	6.34514e-05	9.94188e-05	9.77e-05	5.60941e-05	0.000110014	6.49283e-05	0.000184953
Dodecanoic acid	Lipids and lipid-like molecules	0.000553816	0.000176275	0.000205118	0.000177915	0.000188102	0.000333497	0.000319722	0.000332396	0.000411403	0.00020718	0.000295104	0.000218491	0.000224736	0.000233307	0.000179244	0.00026327	0.000282823	0.000240394
Maleic acid	Organic acids and derivatives	0.000984163	0.00112382	0.000895674	0.000914008	0.000967974	0.00105349	0.00123069	0.00135208	0.00113259	0.00107663	0.000904015	0.00125209	0.00100294	0.000902978	0.000936462	0.000788333	0.00130088	0.00100106
Adenine	Organoheterocyclic compounds	0.00844326	0.00654064	0.00576509	0.00544599	0.00649088	0.00511181	0.00701076	0.00839561	0.0057195	0.00563941	0.0075837	0.00584837	0.00848912	0.0060748	0.00450279	0.00575961	0.00594374	0.00920876
Eicosadienoic acid	Lipids and lipid-like molecules	0.000694939	0.00073998	0.000742259	0.000203586	0.000646515	0.000285081	0.000785738	0.000784406	0.00145867	0.000527338	0.000487491	0.000560441	0.0004869	0.00057947	0.000555252	0.000916692	0.000532176	0.000508186
Oleic acid	Lipids and lipid-like molecules	0.000165045	0.000139744	0.000114783	7.76131e-05	0.000106926	0.000159708	0.000121837	0.000157787	0.000162045	0.00014133	0.000184567	0.000153347	0.000125155	0.000136483	0.000148783	0.000131233	0.000200691	0.000126668
Pelargonic acid	Lipids and lipid-like molecules	0.0018022	0.00205816	0.00200927	0.00217338	0.00273878	0.00244451	0.00307526	0.00244899	0.00209511	0.00213052	0.00163064	0.00234633	0.00263311	0.00202464	0.00170374	0.00216656	0.0021987	0.00180162
Beta-Guanidinopropionic acid	Organic nitrogen compounds	0.00309418	0.00386756	0.00352221	0.00401382	0.00370583	0.00388189	0.0035842	0.00387865	0.00354233	0.00391301	0.00406299	0.00422443	0.00396209	0.00371488	0.0039271	0.00326658	0.00352687	0.00379978
Stearic acid	Lipids and lipid-like molecules	0.0118887	0.00726257	0.00841074	0.00677478	0.0088553	0.00396987	0.00775438	0.00560681	0.0077179	0.00421314	0.00957352	0.00819122	0.00709863	0.0104456	0.011102	0.0085019	0.00860904	0.00987611
4-Hydroxyproline	Organic acids and derivatives	9.08184e-05	0.000103205	0.000131508	0.00016988	0.000182983	7.26462e-05	7.86534e-05	5.65011e-05	6.8039e-05	3.68016e-05	6.50265e-05	4.66634e-05	6.01724e-05	3.24342e-05	7.25608e-05	6.04503e-05	3.8971e-05	5.33312e-05
Leucinic acid	Lipids and lipid-like molecules	0.000110367	0.000231009	0.000269577	0.000270378	0.000283783	0.000575168	0.000335522	0.000270539	0.000120184	0.000387305	0.000236914	3.63519e-05	0.000374585	0.000313882	0.00026118	0.000195486	6.41436e-05	0.000111295
Pentadecanoic acid	Lipids and lipid-like molecules	0.000298565	0.000141377	0.000256663	9.07532e-05	0.000234493	0.000127387	0.000181237	0.00017315	0.000204899	0.000104328	0.000141417	0.000121093	0.000113275	0.000154384	0.000352982	0.000241765	0.000345611	0.000139201
Heptadecanoic acid	Lipids and lipid-like molecules	0.0005539	0.000353038	0.000643383	0.00014744	0.000394127	0.00020787	0.00027951	0.000294423	0.000386925	0.000205171	0.000269066	0.000200657	0.000191897	0.000324875	0.000701461	0.000378755	0.000864826	0.000219257
Nervonic acid	Lipids and lipid-like molecules	0.000155451	0.000122043	0.000169632	8.39723e-06	1.42174e-05	5.63545e-06	6.16061e-06	1.09591e-05	3.04006e-06	8.08971e-06	5.43024e-06	1.80447e-06	2.04442e-06	5.5473e-06	3.96668e-05	2.48477e-05	0.000202972	5.15397e-06
Fumaric acid	Organic acids and derivatives	0.000336856	7.63214e-05	4.15149e-05	6.54818e-05	0.000177731	3.25605e-05	5.95506e-05	3.97309e-05	3.71061e-05	4.38605e-05	0.000233636	3.11408e-05	2.75008e-05	4.1204e-05	3.51307e-05	2.3362e-05	2.87689e-05	0.000175804
Creatinine	Organic acids and derivatives	0.00101721	0.00103098	0.000873435	0.00143289	0.000846108	0.000875711	0.00101447	0.00106434	0.00089174	0.0010292	0.00144625	0.00102941	0.00112575	0.00111073	0.00105853	0.000887693	0.00101366	0.00119007
Arachidonic acid	Lipids and lipid-like molecules	0.0135199	0.0046847	0.00555248	0.00188986	0.00396346	0.00582875	0.00400778	0.00693359	0.01168	0.00334026	0.00312675	0.00426168	0.00220958	0.00414734	0.0106886	0.00937655	0.00798465	0.00524936
D-Malic acid	Lipids and lipid-like molecules	0.0103118	0.0112816	0.00951389	0.0094681	0.0100725	0.0113466	0.0115602	0.0128814	0.0119396	0.0112284	0.0096421	0.0134067	0.0108881	0.00967773	0.0097481	0.00832136	0.0137476	0.0101315
Pyroglutamic acid	Organic acids and derivatives	0.00101469	0.000700902	0.000753249	0.000746303	0.000753762	0.000649695	0.00112821	0.000763305	0.000685628	0.000650081	0.000619687	0.00063584	0.000532102	0.000674858	0.000873244	0.000681252	0.000890566	0.000661361
Alpha-Linolenic acid	Lipids and lipid-like molecules	0.0015853	0.000760158	0.0012809	0.000543014	0.00139717	0.000495985	0.00130932	0.00135208	0.00122751	0.00077612	0.000723432	0.00107886	0.00102267	0.00108065	0.00178025	0.00132416	0.00171724	0.000795631
Ornithine	Organic acids and derivatives	7.58931e-05	0.000140837	0.000133117	0.000116835	0.000169709	0.000208863	0.00020418	0.00019272	0.000111814	0.000193137	0.000234408	0.000170136	0.000141655	0.000147809	0.000223595	0.000198562	0.000203372	0.000147949
gamma-Aminobutyric acid	Organic acids and derivatives	0.00041124	0.000484321	0.000473777	0.000461815	0.000575217	0.000381589	0.000563982	0.000467566	0.000496862	0.000291745	0.000457795	0.000302687	0.000387362	0.000357468	0.000607832	0.000342692	0.000414477	0.00063621
Erucic acid	Lipids and lipid-like molecules	0.000502819	0.000428529	0.000588899	0.000115287	0.000255677	0.000168782	4.54236e-05	0.000226763	0.000581452	5.9732e-06	0.000187535	9.66922e-05	5.2343e-05	0.000121569	0.000522227	0.00030103	0.000145539	0.000118143
Indoleacetaldehyde	Organoheterocyclic compounds	0.000599585	0.000273241	0.000244662	0.000310629	0.000287471	0.000300347	0.000367793	0.000253658	0.000359549	0.000306909	0.000238969	0.000218855	0.000440341	0.000244099	0.000273872	0.000256206	0.000315683	0.000292129
Succinic acid	Organic acids and derivatives	0.000766194	0.00105598	0.000976607	0.00514389	0.00199099	0.00285022	0.00256239	0.000898514	0.00127254	0.00164712	0.00247882	0.00306189	0.00409988	0.00302715	0.00159012	0.00112588	0.00103622	0.00321574
D-Erythrose 4-phosphate	Organic oxygen compounds	9.33101e-05	0.000343499	0.000334654	0.000224966	0.000122395	0.000670909	0.000111245	0.000155646	0.000372549	0.000686599	0.000311255	0.000612613	0.000377297	0.000568783	0.000548428	0.000178277	0.00047509	0.00036127
Linoleic acid	Lipids and lipid-like molecules	0.000217349	0.000106559	0.000133342	7.81046e-05	0.000106116	8.6967e-05	0.000100323	0.000107119	0.000128183	0.000110306	9.47376e-05	9.99072e-05	0.000108285	0.000115016	0.000111114	0.000113543	0.000185264	7.65382e-05
9-Decenoic acid	Lipids and lipid-like molecules	4.45252e-05	2.25528e-05	3.48213e-05	5.54183e-05	5.08686e-05	5.7843e-05	0.000147818	3.84682e-05	1.23696e-05	4.98076e-05	0.000167551	4.20988e-05	4.59301e-05	6.36284e-05	3.22675e-05	2.31348e-05	3.76139e-05	3.97884e-05
9,10-epoxyoctadecanoic acid	Lipids and lipid-like molecules	1.31972e-05	1.43413e-05	1.36709e-05	1.55745e-05	1.1841e-05	1.52785e-05	1.18718e-05	1.43933e-05	1.11821e-05	1.4746e-05	1.79863e-05	1.33316e-05	1.82343e-05	1.28844e-05	8.15875e-06	1.4497e-05	1.49871e-05	1.21905e-05
D-Glucose	Organic oxygen compounds	9.26068e-05	0.00016892	0.000142469	0.000123406	0.000140963	0.000144547	0.000106795	0.000143542	0.000123278	0.000160625	0.000135272	0.000189654	0.000193731	0.000149289	0.00015774	0.000114475	0.000126714	0.000128369
Uracil	Organoheterocyclic compounds	0.000598343	0.000468095	0.000574753	0.000802814	0.00092007	0.000732895	0.000518322	0.000587224	0.00054495	0.000627623	0.000669235	0.000885934	0.000764953	0.000750041	0.000621548	0.00054008	0.000393064	0.00068234
Prostaglandin D2	Lipids and lipid-like molecules	3.85158e-05	4.8215e-05	3.04119e-05	2.71214e-05	3.83885e-05	3.62233e-05	3.32014e-05	5.54121e-05	1.89812e-05	2.34325e-05	4.62453e-05	3.1476e-05	3.13213e-05	3.45495e-05	7.64588e-05	5.67641e-05	0.00014205	2.36919e-05
Ethyl oleate	Lipids and lipid-like molecules	0.00440641	0.00238833	0.00334316	0.00068998	0.00158703	0.000989785	0.000636359	0.00127664	0.00297445	0.000641343	0.000568159	0.000716952	0.000478825	0.000832594	0.00204477	0.00174311	0.00225773	0.000660398
Citric acid	Organic acids and derivatives	0.000115706	5.48595e-05	5.30097e-05	6.65743e-05	0.000119309	7.76831e-05	5.1522e-05	3.47637e-05	2.33279e-05	2.46639e-05	0.000189269	4.6324e-05	4.93251e-05	6.36264e-05	2.96345e-05	4.31648e-05	3.82321e-05	9.75049e-05
Citrulline	Organic acids and derivatives	7.83182e-05	0.000123648	0.000118638	0.000111006	0.000153628	0.000190395	0.000178392	0.00017322	9.29372e-05	0.000164218	0.000207582	0.000147984	0.000121499	0.000131473	0.000180785	0.00014258	0.000181706	0.000128054
Arachidic acid	Lipids and lipid-like molecules	0.000606928	0.00015881	0.000259514	3.85644e-05	6.59061e-05	2.17502e-05	3.28033e-05	3.64478e-05	0.000127646	3.45387e-05	3.04011e-05	1.02956e-05	2.4494e-05	2.78957e-05	0.00017004	0.000101671	0.000418124	3.64517e-05
L-Proline	Organic acids and derivatives	0.000502969	0.000680928	0.000391482	0.000930548	0.000664666	0.00039428	0.000711281	0.000380672	0.000314149	0.000304484	0.000411876	0.000278745	0.000418974	0.000296317	0.000311024	0.000388906	0.000502932	0.000414694
Taurocholic acid	Lipids and lipid-like molecules	3.51225e-08	1.86813e-05	8.37581e-06	2.62121e-06	9.87285e-07	1.92287e-05	6.93287e-05	6.9517e-07	3.57062e-08	2.78616e-05	7.80813e-06	8.14715e-06	1.2282e-05	8.09439e-05	1.04408e-06	4.26957e-06	1.91021e-05	2.56594e-06
Dihydroxyacetone phosphate	Organic oxygen compounds	4.2601e-05	0.00010728	8.68487e-05	8.19009e-05	4.62423e-05	0.000169213	5.45257e-05	0.000105152	8.14246e-05	0.000105934	5.39315e-05	0.000164132	9.21225e-05	0.000127127	0.000118326	8.44584e-05	0.000108072	4.38954e-05
Xanthine	Organoheterocyclic compounds	0.00679697	0.00343963	0.00311241	0.00231967	0.00331844	0.00270272	0.00261151	0.00285303	0.00243844	0.00198977	0.00235191	0.00221442	0.00188096	0.00249196	0.00315293	0.00355239	0.0034476	0.003013
Ethyl dodecanoate	Lipids and lipid-like molecules	0.00178358	0.000497167	0.00114277	0.000374755	0.000854641	0.000717531	0.000713455	0.00101103	0.00148573	0.000582704	0.000687152	0.000841656	0.000662993	0.000773773	0.00173281	0.00157799	0.00156482	0.000797249
D-Glyceraldehyde 3-phosphate	Organic oxygen compounds	6.91123e-05	0.000124893	0.000132101	0.000114877	0.000106384	0.000192954	9.33551e-05	0.000105085	0.000122875	0.000204386	0.00011796	0.000183077	0.000137204	0.000166414	0.000289941	9.54868e-05	0.000139966	0.00012677
L-Valine	Organic acids and derivatives	0.000928796	0.000515707	0.000471405	0.00039602	0.000503094	0.000432665	0.000713268	0.000607835	0.000590606	0.000327486	0.000438776	0.000408626	0.000445435	0.000379141	0.000608916	0.00061845	0.000723753	0.000497468
4-Ethylbenzoic acid	Benzenoids	0.0001526	0.000281282	0.000246916	0.000397126	0.00037299	5.7065e-05	0.000190559	7.76947e-05	0.000192766	0.000160007	0.00043493	0.000153578	0.000134313	0.000135495	0.000157324	0.000145455	0.00019874	0.000211877
Thymidine	Nucleosides, nucleotides, and analogues	0.000258515	0.000255479	0.000281481	0.000268696	0.000282698	0.000217346	0.000173094	0.000149711	0.000151586	0.00014587	0.000122981	0.000164349	0.000169099	0.000127219	0.000149658	0.000135872	0.000113605	0.000137584
D-Ribose 5-phosphate	Organic oxygen compounds	0.000490986	0.00065531	0.000452927	0.000407286	0.000366775	0.00106267	0.000371737	0.000497082	0.000406879	0.00112717	0.000674793	0.00146145	0.000480303	0.000988668	0.000958475	0.000447681	0.000678906	0.000726492
L-Glutamic acid	Organic acids and derivatives	0.00472877	0.00549629	0.00540286	0.00502672	0.0064813	0.00417015	0.00633335	0.00543329	0.0052403	0.00325117	0.00507127	0.00325342	0.00426029	0.00387996	0.00675153	0.0038178	0.00455513	0.00720702
Uridine	Nucleosides, nucleotides, and analogues	0.00312791	0.00219102	0.00283086	0.00390635	0.00442257	0.00385179	0.00241104	0.00314206	0.00279393	0.00324347	0.00355452	0.00443978	0.00356231	0.00412171	0.00319815	0.00263329	0.00211551	0.00362688
Allantoin	Organoheterocyclic compounds	0.00173243	0.0012099	0.00139497	0.0023044	0.00280317	0.00350306	0.00219522	0.00219495	0.00171659	0.00145816	0.00145191	0.00285701	0.00197754	0.00204187	0.00135445	0.00197542	0.000773969	0.00197405
4-Dodecylbenzenesulfonic Acid	Benzenoids	0.00170435	0.0020349	0.00200354	0.00197249	0.00108063	0.00192126	0.0017608	0.00174265	0.00148562	0.000828764	0.000663835	0.00120074	0.00132602	0.00125154	0.00101219	0.00217424	0.00097326	0.00162612
Bovinic acid	Lipids and lipid-like molecules	0.000297492	0.000190754	0.000175124	0.00010744	0.000135341	0.00011386	0.000124128	0.000122195	0.000129189	0.000148007	0.000119928	0.000176517	0.000255681	0.000120757	0.000240877	0.000139374	0.000152518	0.000130533
Palmitic acid	Lipids and lipid-like molecules	0.000380198	0.000408211	0.000378413	0.000338738	0.000307536	0.000351927	0.000377321	0.000517313	0.00038508	0.000432734	0.000365188	0.000342933	0.000337041	0.000349787	0.000472922	0.000404028	0.000596078	0.000331175
2-Hydroxybutyric acid	Organic acids and derivatives	0.000587037	0.000662055	0.00085707	0.00111885	0.00119406	0.000543301	0.00106463	0.00142885	0.000462415	0.000933116	0.00045861	0.000664705	0.00103682	0.000489794	0.000710094	0.000514758	0.000595719	0.000591908
Docosahexaenoic acid	Lipids and lipid-like molecules	0.0106561	0.00448047	0.00305588	0.000588875	0.00308383	0.00199973	0.00302601	0.0105482	0.00816582	0.00241812	0.00157301	0.00267455	0.00105508	0.00302831	0.00651165	0.00707097	0.0203967	0.00170784
Methylsuccinic acid	Lipids and lipid-like molecules	3.51225e-08	4.15873e-08	4.05403e-05	4.93629e-06	1.82152e-06	1.20208e-05	4.13117e-08	3.67338e-08	0.000360322	1.29108e-05	3.13273e-06	1.54421e-05	0.00045262	6.87556e-06	1.80199e-05	3.8941e-08	3.64776e-08	3.38449e-06
5'-Methylthioadenosine	Nucleosides, nucleotides, and analogues	1.22593e-05	1.81374e-05	1.7026e-05	2.23678e-05	1.6604e-05	1.5473e-05	1.7585e-05	1.82603e-05	1.47324e-05	1.7235e-05	1.54077e-05	1.794e-05	1.81228e-05	1.59249e-05	1.31287e-05	1.10279e-05	1.09303e-05	1.77928e-05
Fructose 1,6-bisphosphate	Organic oxygen compounds	8.12268e-06	2.48119e-05	2.6781e-05	1.42628e-05	2.45403e-05	2.60986e-05	1.87721e-05	2.53302e-05	2.22866e-05	2.61479e-05	2.13694e-05	2.7988e-05	8.80069e-05	2.19139e-05	2.15851e-05	1.70291e-05	1.83975e-05	1.91714e-05
L-Asparagine	Organic acids and derivatives	0.000236089	0.000343066	0.000376486	0.000562547	0.000533049	0.000183747	0.000497768	0.000288558	0.000262703	0.000180279	0.000282573	0.000183179	0.000225796	0.000136506	0.000257722	0.000172197	0.000285266	0.000213753
Dihydrojasmonic acid	Lipids and lipid-like molecules	1.39558e-05	6.80878e-06	1.47063e-05	8.48525e-06	4.3723e-06	2.30239e-05	0.000112237	2.63712e-05	2.66936e-05	2.151e-05	4e-05	2.36071e-05	1.56944e-05	3.69768e-05	1.46393e-05	1.13747e-05	4.81697e-05	4.42861e-05
Glucosamine 6-phosphate	Organic oxygen compounds	9.48348e-06	8.59571e-06	8.93587e-06	6.00023e-06	5.41307e-06	2.25188e-05	6.02492e-06	6.80051e-06	9.50575e-06	3.10449e-05	1.08813e-05	2.4591e-05	5.91599e-06	2.37881e-05	2.59293e-05	7.20903e-06	1.76074e-05	1.02829e-05
Phenylacetylglycine	Organic acids and derivatives	6.63334e-05	0.000120794	9.15713e-05	0.000211551	4.46509e-05	6.94097e-05	1.97686e-05	3.09503e-05	3.40232e-05	8.99197e-05	6.41527e-05	6.66624e-05	0.000109006	6.56127e-05	2.51627e-05	3.19829e-05	3.08825e-05	7.14413e-05
Hypogeic acid	Lipids and lipid-like molecules	7.02741e-05	3.59131e-05	5.65331e-05	2.60631e-05	2.66907e-05	3.58673e-05	2.25423e-05	4.0493e-05	5.88364e-05	3.6517e-05	3.8955e-05	4.8078e-05	2.69456e-05	3.76497e-05	0.000269195	0.000281385	9.94878e-05	3.85184e-05
Taurine	Organic acids and derivatives	0.0517194	0.0608657	0.0570058	0.0644481	0.061027	0.070798	0.0588164	0.0671215	0.0571268	0.0694757	0.0675019	0.0657177	0.0625884	0.0625671	0.0576916	0.0561078	0.0612742	0.0630571
L-Tyrosine	Organic acids and derivatives	0.000206029	0.000134159	0.00013987	0.000155034	0.000133497	6.31324e-06	0.000175005	0.000124834	0.00011717	8.75689e-05	8.42419e-05	6.22754e-05	8.56329e-06	7.6402e-05	0.00013496	0.000104219	0.000141432	9.39664e-05
Gingerol	Benzenoids	7.36185e-05	0.000102115	0.000114552	0.000100342	0.000178693	0.00015049	0.000152767	0.000131652	0.000114847	0.000112864	0.000124568	0.000114562	0.000101159	0.000103393	0.000103527	0.000236783	9.4919e-05	0.00011805
Inosine	Nucleosides, nucleotides, and analogues	0.0235962	0.013151	0.0111252	0.00678173	0.00983274	0.00812433	0.00928442	0.0105129	0.011927	0.00598206	0.00843758	0.00807085	0.00869097	0.00895863	0.0125188	0.0146401	0.0157859	0.0120406
Adenosine	Nucleosides, nucleotides, and analogues	0.000104652	0.000317943	0.000171211	0.000812253	0.000919518	0.000734601	0.00137504	0.00297789	0.000806626	0.00100139	0.00169838	0.00127697	0.00229575	0.000502196	0.000434447	0.000180674	0.000260754	0.00238397
8,11,14-Eicosatrienoic acid	Lipids and lipid-like molecules	0.00239478	0.00116376	0.000825634	0.000262513	0.000975723	0.00194629	0.00103176	0.00203985	0.00396515	0.00131713	0.000836939	0.00116419	0.000696054	0.00120576	0.00244313	0.0018381	0.00148898	0.00126918
D-Glutamine	Organic acids and derivatives	0.0116948	0.0152303	0.0140107	0.0190833	0.0155884	0.018217	0.030425	0.0180636	0.0148424	0.0163011	0.0161395	0.017618	0.0140952	0.0143392	0.0171851	0.0117023	0.0163252	0.0170699
Adenosine monophosphate	Nucleosides, nucleotides, and analogues	1.55087e-05	0.000154494	6.18823e-05	6.90007e-05	4.52359e-05	7.34397e-05	0.000455137	4.52655e-05	2.71375e-05	5.9872e-05	8.19399e-05	0.000495369	6.00015e-05	5.24326e-05	4.01003e-05	5.15204e-05	3.34383e-05	5.45192e-05
2-Phospho-D-glyceric acid	Organic oxygen compounds	2.88124e-05	7.22082e-05	3.76047e-05	0.000239981	4.11016e-05	9.57919e-05	0.000119347	4.81981e-05	6.75321e-05	0.00013009	0.000104783	0.000141251	0.000112956	0.000209995	0.000105769	5.34299e-05	7.3308e-05	6.12859e-05
N-Acetylneuraminic acid	Organic oxygen compounds	8.64749e-06	4.47611e-06	3.47489e-06	3.13972e-06	3.12188e-06	3.47309e-06	7.6327e-06	5.07046e-06	5.16877e-06	4.4853e-06	5.31662e-06	3.39744e-06	3.16912e-06	4.70145e-06	5.30733e-06	2.96178e-06	8.59471e-06	4.11622e-06
Carnosine	Organic acids and derivatives	2.39876e-05	2.82846e-05	2.67837e-05	2.32981e-05	3.10388e-05	4.09886e-05	5.89678e-05	2.01616e-05	1.40317e-05	1.67513e-05	4.14443e-05	2.84326e-05	3.54675e-05	2.34043e-05	2.22475e-05	2.8823e-05	2.45539e-05	2.55748e-05
O-Phosphoethanolamine	Organic acids and derivatives	0.000217247	0.000191578	0.000134996	0.000176642	0.000133279	0.000203356	0.000172035	0.000131946	0.000104446	0.000146921	0.000152447	0.000107308	9.77983e-05	0.000151339	0.000127476	0.000179536	0.000145219	0.000188431
12-Hydroxydodecanoic acid	Organic acids and derivatives	2.39836e-05	9.47716e-06	1.73411e-05	1.20054e-05	1.34563e-05	4.05124e-05	3.61358e-05	2.53657e-05	3.01318e-05	2.27805e-05	2.59999e-05	2.48086e-05	2.14891e-05	2.52839e-05	1.04448e-05	1.52938e-05	2.41856e-05	2.66635e-05
3-Phosphoglyceric acid	Organic oxygen compounds	2.48831e-05	4.70052e-05	5.53149e-05	5.58037e-05	4.35966e-05	5.9314e-05	3.78582e-05	3.63698e-05	4.55748e-05	5.95227e-05	4.77234e-05	5.6405e-05	4.71677e-05	5.54685e-05	5.02139e-05	3.95249e-05	4.93888e-05	4.78365e-05
Glutathione	Organic acids and derivatives	1.42558e-05	0.00016171	6.68565e-05	0.000103356	0.000139503	0.000107359	0.000135788	0.000154306	6.71854e-05	0.000122787	0.000175549	0.000134362	5.58074e-05	7.15435e-05	0.000112409	3.31411e-05	5.99267e-05	0.000115374
Terephthalic acid	Benzenoids	6.81367e-05	6.35449e-05	6.64342e-05	6.24575e-05	6.02122e-05	5.57052e-05	5.64947e-05	5.54154e-05	5.61463e-05	5.78879e-05	5.21959e-05	5.03118e-05	6.24559e-05	5.74001e-05	4.97417e-05	5.25688e-05	5.66305e-05	5.44633e-05
N-Acetyl-L-alanine	Organic acids and derivatives	8.11185e-05	4.24342e-05	4.36841e-05	3.48002e-05	3.44402e-05	4.31632e-05	4.67638e-05	3.9275e-05	5.59718e-05	3.55625e-05	3.30104e-05	3.39514e-05	3.28346e-05	3.35219e-05	6.59526e-05	6.92654e-05	9.15148e-05	3.72188e-05
Uridine diphosphate glucuronic acid	Nucleosides, nucleotides, and analogues	3.43816e-06	6.26597e-06	1.10061e-05	6.71603e-06	8.2279e-06	1.08703e-05	7.28921e-06	4.24286e-06	4.833e-06	9.88616e-06	7.77775e-06	4.49055e-06	3.03376e-06	7.14078e-06	8.46547e-06	5.40961e-06	6.59119e-06	6.41588e-06
16(17)-EpDPE	Lipids and lipid-like molecules	1.45317e-05	3.57984e-06	2.26598e-06	1.78626e-06	3.99361e-06	3.63245e-06	6.0062e-06	6.31559e-06	8.4851e-06	3.61653e-06	2.37885e-06	3.24132e-06	7.89222e-06	2.61909e-06	4.96139e-06	9.06973e-06	1.355e-05	1.59358e-06
D-2,3-Dihydroxypropanoic acid	Organic oxygen compounds	3.94438e-05	8.14552e-05	5.8708e-05	0.000107634	5.68936e-05	0.000109902	0.000102211	8.70796e-05	7.36916e-05	0.000107851	8.96603e-05	0.00012542	8.38425e-05	0.000132978	0.000109446	5.97615e-05	0.00015458	0.000130494
Uridine diphosphate-N-acetylglucosamine	Nucleosides, nucleotides, and analogues	2.10092e-05	6.80617e-05	5.85914e-05	7.77051e-05	7.49642e-05	7.81221e-05	5.47299e-05	4.85084e-05	4.35008e-05	6.13351e-05	5.53457e-05	6.13568e-05	4.44895e-05	5.65736e-05	4.41048e-05	4.67951e-05	3.75591e-05	5.19861e-05
cis-Aconitic acid	Organic acids and derivatives	0.000490392	0.000200061	0.000174679	0.000131394	0.000383928	0.000137002	0.000150753	0.0001257	6.06755e-05	4.57871e-05	0.000401566	8.09055e-05	0.000147286	0.000140771	7.47672e-05	0.000159331	8.34197e-05	0.000287853
Hypotaurine	Organic acids and derivatives	9.87277e-05	0.000151934	9.75922e-05	0.000145968	0.000126006	0.000128541	0.000269228	0.00025785	0.000105023	0.000138739	0.000193379	0.000146542	0.00012066	0.000126702	0.000119349	6.54025e-05	0.000157465	0.000117077
L-Arginine	Organic acids and derivatives	9.99308e-05	0.00010011	0.000124337	8.45944e-05	9.81394e-05	7.6836e-05	0.000163295	0.000163416	0.000174898	0.00012797	0.000162737	0.000138296	0.000144759	0.00013363	0.00020323	0.0001453	0.000164609	0.000106106
L-Malic acid	Organic acids and derivatives	0.000232629	0.000368985	0.000358721	0.000234712	0.00037988	0.000592975	0.000261977	0.000315744	0.000377276	0.000330502	0.000266017	0.000283248	0.000453251	0.000280085	0.000302541	0.000279722	0.000485745	0.000237756
Hydroxyphenyllactic acid	Phenylpropanoids and polyketides	0.000217154	0.000182209	0.000159898	0.000319513	0.000205957	0.000189745	0.000632217	0.000388659	0.000292166	0.000209074	0.000142646	0.000115965	9.94527e-05	0.000158881	0.00020032	0.000120384	0.000202012	0.000230477
Pantothenic acid	Organooxygen compounds	0.00168754	0.00134412	0.0035009	0.00232861	0.00214438	0.00373518	0.00283655	0.00421867	0.00377556	0.00522389	0.00670519	0.00512452	0.00468175	0.00431363	0.00557557	0.00382969	0.00328702	0.00258788
Succinic acid semialdehyde	Lipids and lipid-like molecules	0.000734303	0.000278381	0.000304358	0.000271715	0.000571796	0.000231493	0.000266353	0.000196445	0.000153228	9.67428e-05	0.000632206	0.000152096	0.000199034	0.000219052	0.000147417	0.000276348	0.000165652	0.000379956
N-Acetyl-L-methionine	Organic acids and derivatives	0.00021014	0.000110783	0.000132423	4.01871e-05	9.73329e-05	0.000101903	0.000121412	0.000119321	0.000126117	6.09422e-05	6.26605e-05	0.000101031	5.29723e-05	0.000105566	0.000166062	0.000141424	0.000192637	8.08093e-05
2-Hydroxyethanesulfonate	Organic acids and derivatives	0.00622025	0.00732765	0.0077339	0.00989421	0.00887271	0.0105636	0.00749938	0.0110671	0.0115212	0.0185988	0.0144399	0.0125501	0.013685	0.0121574	0.0112184	0.0112306	0.0102764	0.0128305
4-Hydroxy tolbutamide	Benzenoids	2.96662e-05	3.6544e-05	3.41036e-05	4.26658e-05	2.78966e-05	5.26469e-05	9.6092e-05	5.63796e-05	3.78684e-05	7.2081e-05	7.6877e-05	4.32422e-05	3.2132e-05	4.87491e-05	4.24784e-05	3.55175e-05	7.03138e-05	3.46472e-05
Inosinic acid	Nucleosides, nucleotides, and analogues	0.000600969	0.000708074	0.00161011	0.000459107	0.000939115	0.000702368	0.00046033	0.000905983	0.00150771	0.00118718	0.000664079	0.000918859	0.000250336	0.000682569	0.00214642	0.000533106	0.00173781	0.000616417
Pyrophosphate	Homogeneous non-metal compounds	5.97226e-05	7.75671e-05	7.87312e-05	0.000103345	9.7543e-05	7.51404e-05	0.000106172	0.000153696	8.59247e-05	5.00186e-05	9.3549e-05	6.34049e-05	8.65459e-05	5.51221e-05	0.000120564	8.00775e-05	8.42477e-05	0.000101798
9,10-DHOME	Lipids and lipid-like molecules	7.37659e-06	1.77426e-06	1.71288e-05	1.74038e-05	1.21244e-05	8.16647e-06	4.31319e-05	1.52091e-05	9.1624e-06	6.0912e-06	4.5419e-06	8.11519e-06	7.43377e-06	7.67578e-06	6.6272e-06	9.82847e-06	1.22789e-05	6.9966e-06
myo-Inositol	Organic oxygen compounds	0.000621536	0.000592199	0.000434655	0.000310769	0.000409321	0.000426744	0.000339758	0.000358091	0.000289183	0.000414387	0.000435407	0.000398976	0.000295311	0.000443166	0.000372901	0.000651976	0.000364178	0.000337503
L-Erythrulose	Organic oxygen compounds	0.000788191	0.000868105	0.000333552	0.000965967	0.000464332	0.000818898	0.00183555	0.000384465	0.00080502	0.000692639	0.000697986	0.000806025	0.000462805	0.000914349	0.000489334	0.00073235	0.000688327	0.000734433
L-Phenylalanine	Organic acids and derivatives	0.000999183	0.000534208	0.000654521	0.0005343	0.000628131	0.000478675	0.000698982	0.000595386	0.000678495	0.000576234	0.0005077	0.000519677	0.000576367	0.000499179	0.000773079	0.00067895	0.000914701	0.000547086
Hydrogen phosphate	Homogeneous non-metal compounds	0.000104196	0.000299839	0.000335579	0.000256161	0.000100291	0.00020617	0.00010618	0.000133898	0.00018661	0.000223388	0.00019811	9.19452e-05	0.000129569	0.000195143	0.000177807	0.000258085	0.000146875	0.000181733
L-Iditol	Organic oxygen compounds	1.80644e-05	1.21221e-05	1.1986e-05	1.40662e-05	1.18292e-05	5.46511e-06	1.65616e-05	1.17171e-05	1.08656e-05	7.48922e-06	7.36485e-06	5.09511e-06	6.11121e-06	5.4539e-06	1.19504e-05	8.9868e-06	1.27685e-05	8.38161e-06
ADP	Nucleosides, nucleotides, and analogues	1.97464e-05	9.57959e-06	2.5756e-05	5.15875e-05	1.171e-05	1.56285e-05	1.2743e-05	1.60182e-05	1.98105e-05	1.26841e-05	2.13231e-05	2.10928e-05	1.00223e-05	1.8939e-05	1.60222e-05	1.04889e-05	2.0291e-05	8.55086e-06
3-Hydroxyisovaleric acid	Lipids and lipid-like molecules	8.51684e-05	0.000157708	0.000121785	0.000115811	0.000156716	0.000166688	0.000108877	0.000151167	0.00043374	0.00108926	0.000141721	3.85071e-08	3.97194e-08	0.000306663	0.000169472	0.000185371	0.000222547	0.000207294
D-Xylitol	Organic oxygen compounds	0.000526206	0.000310369	0.000239994	0.000143458	0.000238186	0.000282257	0.000249105	0.00033491	0.000416514	0.00025404	0.000270412	0.000379129	0.000353283	0.000330957	0.000356246	0.000334522	0.00045136	0.000274124
3-Sulfinato-L-alaninate	Organic acids and derivatives	0.00866972	0.00473594	0.00454301	0.0116579	0.0150967	0.0071095	0.00705427	0.0116552	0.00638738	0.00523657	0.00526329	0.00577324	0.00732326	0.00628111	0.00380753	0.00412727	0.00314379	0.0082806
Ascorbic acid	Organoheterocyclic compounds	7.28649e-05	2.31052e-05	2.99482e-05	1.66165e-05	4.66918e-05	7.13344e-05	4.21268e-05	7.60345e-05	6.15417e-05	3.77121e-05	8.628e-05	3.57954e-05	1.01321e-05	3.9271e-05	5.11689e-05	4.81225e-05	5.73033e-05	4.07853e-05
S-Adenosylhomocysteine	Nucleosides, nucleotides, and analogues	1.09961e-05	5.54223e-06	7.3339e-06	3.71425e-06	5.55585e-06	5.44809e-06	4.3154e-06	5.76614e-06	5.25277e-06	3.68152e-06	5.02395e-06	4.75187e-06	3.31353e-06	4.64371e-06	6.63771e-06	6.5843e-06	8.68242e-06	4.57903e-06
Maltitol	Lipids and lipid-like molecules	4.76736e-05	5.97999e-05	4.67064e-05	4.48022e-05	6.172e-05	2.43615e-05	1.58691e-05	2.79243e-05	2.22812e-05	3.64981e-05	3.04428e-05	3.09046e-05	2.63998e-05	3.21963e-05	3.74911e-05	3.14234e-05	2.4576e-05	3.11313e-05
Cytidine	Nucleosides, nucleotides, and analogues	0.000156377	6.76063e-05	0.00015081	0.000157101	0.000157957	0.000185635	9.83921e-05	0.000116704	0.000123104	0.000185895	0.000182926	0.000119425	0.000119988	0.00019946	0.000180034	8.6149e-05	0.000137758	0.000163461
Phosphoserine	Organic acids and derivatives	3.60498e-05	4.97888e-05	4.50475e-05	5.17455e-05	3.61486e-05	5.40776e-05	4.21266e-05	3.61679e-05	4.42973e-05	5.75259e-05	4.16358e-05	6.95101e-05	4.45982e-05	5.35925e-05	5.80098e-05	3.81006e-05	4.90043e-05	4.66507e-05
L-Glutamine	Organic acids and derivatives	0.00118044	0.00184907	0.00167465	0.00176973	0.0016412	0.00197875	0.00247762	0.00161211	0.0012513	0.00190185	0.00142944	0.00160011	0.00131423	0.00128037	0.00139127	0.00142701	0.00154021	0.0016795
2-Furoic acid	Organoheterocyclic compounds	0.000115971	0.000130968	0.000119349	0.000146683	0.000151382	0.000113867	0.000111427	0.00012351	9.0185e-05	0.000116428	9.84777e-05	0.000122238	7.57225e-05	0.000133947	0.000174891	0.000112719	0.000137216	0.000101904
Beta-D-Galactose	Organic oxygen compounds	1.32984e-05	3.00391e-05	3.49923e-05	1.79292e-05	1.66509e-05	4.95081e-05	2.06318e-05	2.42892e-05	5.72442e-05	5.3459e-05	2.68894e-05	4.54676e-05	3.69585e-05	5.29113e-05	5.74608e-05	2.59136e-05	6.67922e-05	2.30724e-05
L-Serine	Organic acids and derivatives	0.000348559	0.000415132	0.000576191	0.000739265	0.00100056	0.000299537	0.00051508	0.000370133	0.000474614	0.000392193	0.000651481	0.000351732	0.000652492	0.000203187	0.000506572	0.000372087	0.000476012	0.000398055
Deoxyinosine	Nucleosides, nucleotides, and analogues	3.60044e-05	1.30158e-05	9.73963e-06	1.86143e-05	3.58026e-05	2.4874e-05	3.16903e-05	4.05102e-05	2.37594e-05	1.00004e-05	1.28077e-05	3.20341e-05	2.9967e-05	1.53217e-05	1.767e-05	1.44255e-05	7.13526e-06	2.27972e-05
N-Acetyl-L-aspartic acid	Organic acids and derivatives	0.000223162	0.000244496	0.000239502	0.000365124	0.000311076	0.00019402	0.00032906	0.000138978	0.000126769	0.000276708	0.00013763	0.0001262	0.00016012	0.000156403	0.000153596	0.00120435	0.000116465	0.000236322
L-Cysteine	Organic acids and derivatives	0.000892838	0.000381828	0.000286	0.000352795	0.000387104	0.000262498	0.000171756	0.000265083	0.000426049	0.000318072	0.000330666	0.000364038	0.000422889	0.000412873	0.000316214	0.000504885	0.000487565	0.000427253
Sedoheptulose	Organic oxygen compounds	0.000591108	0.000137216	9.77082e-05	4.18576e-05	9.57441e-05	7.0018e-05	7.94924e-05	0.000158281	0.00039488	5.37705e-05	8.22301e-05	0.00010807	0.000105134	0.000143979	0.000264148	0.00023287	0.000513876	0.0001534
dGDP	Nucleosides, nucleotides, and analogues	2.55018e-05	6.22025e-05	5.38482e-05	0.000150159	6.38658e-05	9.89431e-05	7.53512e-05	7.08172e-05	6.08518e-05	0.000112099	9.93735e-05	0.000111028	9.56726e-05	0.000124334	0.000107969	4.78145e-05	5.35636e-05	7.89756e-05
Mesaconic acid	Lipids and lipid-like molecules	6.23466e-05	0.000128426	0.000135744	0.000162243	0.000147345	0.000137061	0.000118872	0.000110904	9.30739e-05	0.000173828	0.000110923	0.000129278	0.000102897	0.000155452	0.000130515	6.39247e-05	9.36327e-05	0.000131471
3-Hydroxycapric acid	Organic acids and derivatives	0.000356776	4.71173e-05	0.000274054	6.28316e-05	0.000164432	0.00117363	0.00099855	0.000573074	0.000713431	0.000641004	0.000790062	0.000419563	0.000253173	0.000858606	0.000265138	0.000339802	0.000735807	0.000419599
Citicoline	Nucleosides, nucleotides, and analogues	4.02778e-06	7.38501e-06	5.21071e-06	8.07805e-06	8.45329e-06	5.85013e-06	5.3177e-06	7.36743e-06	3.30388e-06	5.29851e-06	5.43185e-06	5.9305e-06	4.99633e-06	4.69702e-06	4.31793e-06	4.35078e-06	4.13889e-06	5.28156e-06
5-Methylcytidine	Nucleosides, nucleotides, and analogues	1.47042e-07	5.89097e-06	2.57168e-06	3.08742e-06	3.98185e-06	4.20816e-06	2.96063e-06	2.77307e-06	1.40678e-06	4.7749e-06	4.20683e-06	2.63976e-06	3.84488e-06	2.59051e-06	3.07035e-06	4.76968e-06	3.45722e-06	2.12537e-06
AICA-riboside	Nucleosides, nucleotides, and analogues	8.57325e-06	7.97163e-06	4.31346e-07	1.22295e-06	1.18005e-06	1.03633e-05	1.1066e-05	5.84503e-06	1.89617e-06	7.19535e-06	6.83172e-06	5.0931e-06	5.79179e-06	6.66831e-06	3.43016e-08	3.8941e-08	5.97259e-06	4.30048e-06
Myristoleic acid	Lipids and lipid-like molecules	0.000500558	7.98032e-05	0.000208821	9.76565e-05	0.000193748	0.000578303	0.00043882	0.000377769	0.000522471	0.000314678	0.000513868	0.000305766	0.000299046	0.000342875	0.000144212	0.000246267	0.000344328	3.3167e-06
Galactose 1-phosphate	Organic oxygen compounds	4.49945e-05	0.000321165	0.000281373	0.000192659	9.46135e-05	0.000755943	8.65824e-05	0.000121793	0.000323927	0.00086325	0.000289709	0.000817408	0.000267216	0.000685544	0.000687518	0.000126382	0.000487221	0.000349741
Xanthosine	Nucleosides, nucleotides, and analogues	1.61495e-05	1.33408e-05	5.48968e-06	5.08274e-06	7.6895e-06	7.69525e-06	5.73423e-06	7.82486e-06	6.58656e-06	4.21486e-06	3.97205e-06	8.71965e-06	9.30682e-06	5.87615e-06	6.88794e-06	1.02183e-05	1.10727e-05	8.19038e-06
Uridine 5'-monophosphate	Nucleosides, nucleotides, and analogues	3.03766e-05	0.00011273	0.000103651	0.000150117	0.00011507	0.000119421	7.75078e-05	6.29416e-05	5.29759e-05	0.000166466	0.000142168	0.000120986	6.12363e-05	8.6177e-05	9.57774e-05	5.13828e-05	5.17133e-05	0.00010353
Acetylglycine	Organic acids and derivatives	2.89205e-05	5.87749e-05	6.31044e-05	5.29294e-05	5.76473e-05	7.04735e-05	7.96088e-05	0.000116517	3.22138e-05	5.26408e-05	5.19773e-05	0.000113402	2.98836e-05	4.22212e-05	3.92769e-05	8.31732e-05	5.52371e-05	5.03124e-05
Threonic acid	Organic oxygen compounds	2.44221e-05	4.34186e-05	3.91092e-05	8.45244e-05	6.47858e-05	5.08856e-05	4.69197e-05	4.35113e-05	1.99261e-05	4.71723e-05	4.67714e-05	4.83708e-05	7.83162e-05	4.10002e-05	3.52167e-05	3.75668e-05	3.50172e-05	6.5158e-05
L-2-Hydroxyglutaric acid	Lipids and lipid-like molecules	0.000361661	0.000792743	0.000798986	0.00101351	0.000852689	0.00105052	0.000761493	0.000641475	0.000590399	0.00121753	0.000843242	0.000771012	0.000666502	0.000946422	0.000807735	0.000336339	0.000617147	0.000844066
Ribitol	Organic oxygen compounds	5.13064e-05	4.66691e-05	6.47933e-05	4.53511e-05	3.82024e-05	4.55062e-05	3.954e-05	4.90375e-05	4.55056e-05	5.16986e-05	4.40186e-05	2.94937e-05	3.15609e-05	3.03757e-05	3.70556e-05	3.75046e-05	6.62163e-05	5.68434e-05
D-Ribose	Organic oxygen compounds	0.00136559	0.000263698	0.000237494	9.71159e-05	0.000195792	0.000150924	0.000158931	0.000321729	0.000746961	0.000123695	0.000183272	0.000278738	0.000215498	0.000345483	0.000645264	0.0004582	0.00100053	0.000310307
2-Hydroxy-3-methylbutyric acid	Lipids and lipid-like molecules	0.00084562	0.000913796	0.00109723	0.00094651	0.000984625	0.00230022	0.000728583	0.000727622	0.00107756	0.00194793	0.000631951	0.00143131	0.000999825	0.00131515	0.000697276	0.000775306	0.000552801	0.000601143
Cytidine monophosphate N-acetylneuraminic acid	Nucleosides, nucleotides, and analogues	2.17142e-06	3.86494e-06	3.97459e-06	5.24792e-06	3.79116e-06	3.7947e-06	3.43714e-06	3.15804e-06	3.09742e-06	4.72493e-06	5.01604e-06	4.52545e-06	3.74721e-06	4.05661e-06	3.40282e-06	1.77014e-06	2.69315e-06	4.03555e-06
Bilobalide A	Lipids and lipid-like molecules	5.56936e-05	3.55334e-05	2.67981e-05	2.91915e-05	3.32265e-05	3.08253e-05	3.69481e-05	2.56524e-05	3.37145e-05	2.82136e-05	2.63506e-05	4.46019e-05	4.56047e-05	3.22917e-05	3.1127e-05	2.71021e-05	4.19807e-05	3.3895e-05
6-Phosphogluconic acid	Organic oxygen compounds	8.19878e-06	5.21829e-05	4.33473e-05	3.19232e-05	1.65753e-05	8.48172e-05	1.58819e-05	2.63646e-05	4.3962e-05	9.88104e-05	5.21779e-05	0.000111339	4.06929e-05	8.58494e-05	7.82079e-05	2.31379e-05	6.74549e-05	5.41528e-05
Deoxyadenosine	Nucleosides, nucleotides, and analogues	2.69587e-05	1.72503e-05	2.78334e-05	1.81457e-05	2.19728e-05	1.72893e-05	5.5029e-05	1.81313e-05	5.72908e-05	1.58025e-05	1.40058e-05	1.51803e-05	1.67497e-05	1.4102e-05	1.33498e-05	5.26867e-05	5.32147e-05	1.60166e-05
alpha-Tocopherol	Lipids and lipid-like molecules	1.62859e-05	5.3747e-05	5.8638e-05	4.09984e-05	2.05909e-05	6.53176e-05	6.56388e-05	5.0621e-05	3.81484e-05	6.20989e-05	5.14731e-05	4.00233e-05	1.93189e-05	3.81566e-05	7.69799e-05	3.02022e-05	8.21325e-05	5.71995e-05
Isokobusone	Organic oxygen compounds	4.08449e-05	5.7082e-05	9.16689e-05	5.69675e-05	7.88587e-05	0.000100918	0.000170049	7.75416e-05	5.30108e-05	8.9262e-05	4.25491e-05	6.79001e-05	5.72692e-05	0.000108127	6.35861e-05	9.07034e-05	0.00013331	5.00743e-05
15S-hydroxy-5Z,8Z,11Z,13E,17Z-eicosapentaenoic acid	Lipids and lipid-like molecules	1.27994e-05	2.51833e-06	5.43683e-06	1.83322e-06	2.99669e-06	2.68464e-06	1.54213e-05	7.15688e-06	1.16007e-05	3.63557e-06	2.79051e-06	1.53368e-06	1.09176e-05	4.18917e-06	3.0481e-06	7.01566e-06	1.2597e-05	3.99253e-06
Adenylsuccinic acid	Nucleosides, nucleotides, and analogues	4.4223e-06	9.50333e-06	1.40169e-05	1.27216e-05	1.36397e-05	1.39295e-05	1.20141e-05	1.39466e-05	1.32329e-05	1.5918e-05	1.61931e-05	1.76118e-05	9.0894e-06	1.15759e-05	1.07514e-05	7.068e-06	1.24624e-05	1.05848e-05
1H-Indole-2,3-dione	Organoheterocyclic compounds	5.87918e-05	2.90469e-05	3.53317e-05	3.15538e-05	2.51895e-05	2.39152e-05	1.19256e-05	1.95245e-05	2.94333e-05	2.17804e-05	1.55809e-05	1.5297e-05	2.77387e-05	1.78722e-05	2.18928e-05	3.60584e-05	2.19769e-05	2.03854e-05
2-Hydroxystearic acid	Lipids and lipid-like molecules	6.18338e-05	1.4661e-05	3.4023e-05	7.70614e-06	1.30838e-05	3.7622e-05	4.01662e-05	4.39658e-05	3.83373e-05	4.24102e-06	4.00388e-05	3.05086e-05	2.26601e-05	3.82897e-05	2.97243e-05	2.74075e-05	0.000106049	3.03578e-05
L-Gulonolactone	Organoheterocyclic compounds	0.000106605	9.93831e-05	0.000119272	0.000130769	0.000126103	0.000108926	9.06845e-05	0.000152583	0.000126096	9.31326e-05	8.8604e-05	0.000126627	6.76618e-05	8.47368e-05	8.63322e-05	9.00412e-05	8.51862e-05	8.30363e-05
Indolelactic acid	Organoheterocyclic compounds	3.37106e-06	6.38531e-06	4.46231e-06	8.46158e-06	7.20869e-06	4.15913e-06	1.07731e-05	1.12918e-05	1.37369e-05	2.05051e-05	1.0856e-05	1.09727e-05	8.81375e-06	3.43951e-06	7.39653e-06	4.96351e-06	9.56517e-06	1.1294e-05
L-Threonine	Organic acids and derivatives	0.00130119	0.00162056	0.0020746	0.00245535	0.00255795	0.000883349	0.00104211	0.00138338	0.00135054	0.00114435	0.0013377	0.0012322	0.00136905	0.00101051	0.00152757	0.00120567	0.00133581	0.00107785
Adipic acid	Lipids and lipid-like molecules	0.000169154	0.000151421	0.000178868	3.15204e-05	0.000100028	2.9182e-05	6.83145e-05	0.000145395	0.000335612	3.32533e-05	6.59949e-05	4.10672e-05	0.000157129	4.0291e-05	8.95162e-05	0.000113351	8.62451e-05	6.04164e-05
FAD	Nucleosides, nucleotides, and analogues	2.28889e-05	3.61046e-05	3.09462e-05	3.26474e-05	3.8708e-05	3.62499e-05	4.43781e-05	4.62757e-05	2.96079e-05	4.14333e-05	4.7169e-05	3.69855e-05	3.33785e-05	3.28053e-05	4.47031e-05	2.08902e-05	3.85729e-05	4.05821e-05
3'-AMP	Nucleosides, nucleotides, and analogues	2.26259e-05	1.38754e-05	1.66182e-05	1.31075e-05	1.50409e-05	1.78535e-05	1.53748e-05	1.489e-05	2.69749e-05	1.22686e-05	1.33817e-05	1.69822e-05	1.04893e-05	1.9984e-05	2.12893e-05	1.7661e-05	3.27301e-05	1.4719e-05
Guanine	Organoheterocyclic compounds	3.888e-05	0.000101345	9.47697e-05	0.000296878	8.48996e-05	0.000238309	0.000108186	8.10921e-05	8.39107e-05	0.000223054	0.000183485	0.000118578	0.000136743	0.000121278	8.62335e-05	8.21481e-05	7.98354e-05	7.99958e-05
Tetradecanedioic acid	Lipids and lipid-like molecules	2.66375e-06	2.64143e-06	6.80183e-06	2.93594e-06	2.04586e-06	8.56509e-06	4.35773e-05	3.82681e-06	3.05064e-06	4.48273e-06	1.25184e-05	5.51294e-06	1.1781e-05	8.06592e-06	4.77549e-06	5.11804e-06	1.74554e-05	1.13643e-05
Citramalic acid	Lipids and lipid-like molecules	9.66582e-05	5.17912e-05	4.64254e-05	3.78117e-05	5.29777e-05	4.47795e-05	3.35854e-05	4.82515e-05	7.89363e-05	4.15901e-05	4.37515e-05	3.66755e-05	3.57868e-05	5.00212e-05	5.96163e-05	7.10257e-05	9.51071e-05	5.11033e-05
O-Phosphothreonine	Organic acids and derivatives	2.55042e-05	2.27089e-05	4.49084e-05	1.95783e-05	1.66099e-05	2.84457e-05	7.38932e-05	0.000155481	2.29864e-05	3.61484e-05	9.17974e-05	6.31315e-05	1.74849e-05	3.76451e-05	4.32272e-05	3.28882e-05	2.52694e-05	1.90782e-05
Gluconic acid	Organic oxygen compounds	2.91283e-05	4.60267e-05	3.25482e-05	4.47933e-05	4.39072e-05	6.32704e-05	5.40549e-05	5.72933e-05	4.8291e-05	5.94497e-05	8.84256e-05	6.72297e-05	4.89361e-05	4.3241e-05	6.29125e-05	4.01845e-05	6.31158e-05	6.36363e-05
9,10-Epoxyoctadecenoic acid	Lipids and lipid-like molecules	2.46715e-05	1.52269e-05	1.61153e-05	1.65251e-05	1.59947e-05	0.000124475	9.27911e-05	2.66265e-05	4.98372e-05	4.84784e-05	0.000149859	4.87654e-05	4.48104e-05	0.000131644	1.38481e-05	2.94247e-05	2.11347e-05	3.68633e-05
Citraconic acid	Lipids and lipid-like molecules	0.000108628	0.000117498	0.000168652	0.000173538	0.000198284	0.000160509	0.000179015	0.00015654	0.000243197	0.000143181	0.000110846	0.000160565	0.00016326	0.000154193	0.000123782	0.000143274	0.000107999	0.000145059
Cyclic GMP	Nucleosides, nucleotides, and analogues	8.10618e-07	7.23542e-06	3.15679e-06	1.13467e-05	8.46517e-06	8.54176e-06	7.48221e-06	6.97398e-06	3.99174e-06	1.13675e-05	8.26469e-06	7.14893e-06	7.11783e-06	5.29766e-06	3.9854e-06	5.40365e-06	3.05721e-06	8.89655e-06
(R)-3-Hydroxy-tetradecanoic acid	Lipids and lipid-like molecules	0.000109809	1.55991e-05	5.50214e-05	1.64727e-05	2.69629e-05	0.000192863	0.000114035	0.000126111	0.000167201	9.59479e-05	0.000140346	8.84048e-05	5.29564e-05	0.000182129	5.10644e-05	9.90748e-05	0.000222148	6.94503e-05
16-Hydroxy hexadecanoic acid	Lipids and lipid-like molecules	0.000106562	1.59962e-05	7.46638e-05	1.96653e-05	2.89947e-05	0.000121638	8.83104e-05	8.69016e-05	0.000118788	5.26565e-05	4.45833e-06	7.72364e-05	4.62636e-05	0.000173589	7.19904e-05	0.0001094	0.000228963	8.48715e-05
Hypoxanthine	Organoheterocyclic compounds	0.00389143	0.000998894	0.00189311	0.00160521	0.00249803	0.00143746	0.00168652	0.00244839	0.00355043	0.0017929	0.00141929	0.00219409	0.00146721	0.00110521	0.00327039	0.00201118	0.000665455	0.00151184
N-Methylhydantoin	Organoheterocyclic compounds	3.42856e-05	4.87245e-05	5.09051e-05	6.23275e-05	6.95934e-05	2.29205e-05	6.81975e-05	3.15707e-05	3.76304e-05	2.22395e-05	2.09442e-05	2.12769e-05	3.01064e-05	2.29738e-05	3.45523e-05	2.25044e-05	3.90209e-05	3.24579e-05
2-(3,4-dihydroxyphenyl)-3,5,7-trihydroxy-3,4-dihydro-2H-1-benzopyran-4-one	Phenylpropanoids and polyketides	6.93606e-06	9.19715e-06	8.4e-06	1.04808e-05	8.67437e-06	9.90831e-06	1.10719e-05	1.11224e-05	9.42611e-06	9.14249e-06	8.86805e-06	1.03897e-05	8.99051e-06	8.90324e-06	9.52692e-06	7.597e-06	7.72167e-06	9.35856e-06
Homocarnosine	Organic acids and derivatives	1.76706e-05	1.24578e-05	1.53896e-05	1.37437e-05	1.8725e-05	1.29228e-05	2.3636e-05	1.28579e-05	9.90477e-06	7.8029e-06	1.84108e-05	1.15215e-05	1.19956e-05	1.09749e-05	9.53782e-06	1.15443e-05	1.15011e-05	1.09934e-05
LysoPA(16:0/0:0)	Lipids and lipid-like molecules	2.51308e-05	1.42149e-05	1.12226e-05	1.35238e-05	2.1632e-05	1.59092e-05	1.5027e-05	1.78244e-05	1.94246e-05	1.08554e-05	1.18643e-05	1.64955e-05	1.15965e-05	1.49824e-05	1.78791e-05	1.6771e-05	1.65545e-05	1.59347e-05
Diacetone alcohol	Organic oxygen compounds	0.000185242	0.000185329	0.000161581	0.000141396	0.000155797	0.000185453	0.000233914	0.0001588	0.000211188	0.000208736	0.000256617	0.000202727	0.000255529	0.000215232	0.000138386	0.000169074	0.000161871	0.000166056
L-Aspartic acid	Organic acids and derivatives	6.25745e-05	4.15404e-05	3.85085e-05	6.74433e-05	5.60022e-05	0.00017633	5.07422e-05	4.73975e-05	3.86544e-05	2.29253e-05	0.000162574	2.57283e-05	3.06337e-05	2.55387e-05	2.81167e-05	5.29395e-05	4.1055e-05	3.50662e-05
Melibiose	Organic oxygen compounds	4.29377e-06	1.54447e-05	1.86327e-05	1.06292e-05	9.20011e-06	1.22936e-05	4.93394e-06	1.56733e-05	1.95677e-05	1.40026e-05	1.53168e-05	2.31775e-05	2.35124e-05	2.93563e-05	3.48143e-05	1.18548e-05	2.80601e-05	1.56726e-05
Racemethionine	Organic acids and derivatives	0.000259712	0.000235234	0.000476365	0.000496192	0.000405979	8.61985e-05	0.00018655	0.000182861	0.000235201	0.000162515	0.000152342	0.000131539	0.000203615	0.000209474	0.000202749	0.000214739	0.000272394	0.000200367
(2R,3S)-Piscidic acid	Phenylpropanoids and polyketides	2.83631e-06	1.72582e-06	5.39875e-06	4.79957e-06	3.99978e-06	4.7142e-06	7.63928e-06	2.95711e-06	6.33051e-06	2.89819e-06	2.92483e-06	5.54288e-07	2.23027e-06	3.17338e-06	1.49057e-06	1.55696e-06	2.13423e-06	1.61327e-06
Cyclic AMP	Nucleosides, nucleotides, and analogues	9.85315e-07	3.06082e-06	1.90058e-06	2.98955e-06	2.57082e-06	2.44451e-06	2.383e-06	2.43691e-06	1.67422e-06	2.14517e-06	2.55171e-06	2.61123e-06	2.17122e-06	2.34789e-06	1.65582e-06	2.3221e-06	2.08701e-06	2.89521e-06
Dihydrolipoate	Lipids and lipid-like molecules	5.13014e-05	2.71241e-05	2.49256e-05	1.15297e-05	1.43338e-05	2.93866e-05	1.13401e-05	2.21321e-05	4.32457e-05	1.8492e-05	2.21248e-05	1.95555e-05	1.11765e-05	3.2827e-05	3.29206e-05	2.06147e-05	5.63853e-05	1.63834e-05
Flavin Mononucleotide	Nucleosides, nucleotides, and analogues	2.32379e-06	1.04718e-06	2.81558e-06	2.77563e-06	2.72478e-06	1.22595e-06	2.74972e-06	2.86265e-06	3.03885e-06	1.24783e-06	1.83809e-06	9.32742e-07	2.70797e-06	2.29752e-06	1.79005e-06	2.12101e-06	1.61261e-06	1.85783e-06
Theaflavin	Phenylpropanoids and polyketides	5.35784e-05	4.35968e-05	4.37694e-05	3.92361e-05	4.86965e-05	3.80943e-05	4.70241e-05	3.457e-05	3.49151e-05	3.26693e-05	3.71097e-05	3.29064e-05	3.1471e-05	3.47262e-05	3.97939e-05	3.59544e-05	3.82939e-05	3.21726e-05
Perillic acid	Lipids and lipid-like molecules	5.66442e-05	2.97343e-05	4.79683e-05	5.70399e-05	7.14626e-05	4.11691e-05	0.00012403	4.40142e-05	1.93528e-05	2.82362e-05	4.31146e-05	3.05713e-05	4.13777e-05	4.42308e-05	2.5079e-05	1.50804e-05	5.88496e-05	2.19957e-05
Dethiobiotin	Lipids and lipid-like molecules	2.53231e-05	2.72837e-05	2.72108e-05	3.66129e-05	2.87422e-05	3.1845e-05	3.68374e-05	3.44459e-05	2.73245e-05	3.38653e-05	3.83268e-05	3.53462e-05	3.23534e-05	3.08451e-05	3.09385e-05	2.0957e-05	2.84172e-05	3.31086e-05
Gamma-Linolenic acid	Lipids and lipid-like molecules	2.94509e-06	2.37791e-06	3.49239e-06	2.97519e-06	2.60206e-06	1.455e-05	1.58541e-05	3.11362e-06	5.85346e-06	4.54413e-06	1.57445e-05	7.46464e-06	5.62458e-06	1.48377e-05	2.39825e-06	1.84834e-06	2.66726e-06	5.57844e-06
Methyl jasmonate	Lipids and lipid-like molecules	2.63194e-05	3.38288e-05	2.99652e-05	2.73726e-05	3.92159e-05	2.69484e-05	3.85955e-05	3.6644e-05	3.43247e-05	3.36855e-05	2.21179e-05	3.67789e-05	3.90687e-05	3.34208e-05	3.19339e-05	3.30743e-05	3.04705e-05	2.09545e-05
dUMP	Nucleosides, nucleotides, and analogues	6.41436e-05	0.000101304	8.95827e-05	0.000102311	0.000110796	0.000102702	9.18265e-05	0.000114954	9.53603e-05	0.000119552	9.84708e-05	0.000136846	0.000148339	0.000108545	0.000115876	8.60687e-05	7.6094e-05	9.86194e-05
N-Acetylaspartylglutamic acid	Organic acids and derivatives	7.12428e-06	8.88735e-06	5.79943e-06	1.12652e-05	7.31361e-06	3.62849e-06	5.13097e-06	4.71714e-06	3.51496e-06	7.98547e-06	4.31997e-06	3.90431e-06	3.46281e-06	3.35076e-06	4.10047e-06	3.78802e-06	4.59218e-06	5.11646e-06
Ethyl glucuronide	Organic oxygen compounds	2.62793e-05	4.96405e-05	6.32152e-05	3.71033e-05	4.36811e-05	5.85588e-05	3.07281e-05	4.49903e-05	5.71559e-05	5.97297e-05	4.64841e-05	9.59178e-05	3.9838e-05	7.52923e-05	8.31635e-05	4.05105e-05	7.23519e-05	4.79187e-05
(R)-lipoic acid	Organoheterocyclic compounds	0.000218961	0.000219339	0.0002232	0.000206781	0.000225223	0.000202913	0.000271762	0.000412932	0.00021584	0.000240244	0.000168554	0.0002851	0.00024773	0.000306404	0.000251971	0.000261095	0.000376781	0.000286908
Oxoadipic acid	Organic acids and derivatives	6.60099e-06	2.64962e-05	9.05305e-06	6.41317e-05	2.23899e-05	9.42379e-05	7.93691e-05	5.80028e-05	3.9009e-05	0.000133823	8.84379e-05	0.000150442	0.000103154	0.000141772	6.28791e-05	4.28135e-05	2.41681e-05	8.98084e-05
N-Acetyl-glucosamine 1-phosphate	Organic oxygen compounds	2.8438e-05	1.57487e-05	7.13408e-06	1.02951e-05	9.49522e-06	2.32284e-05	1.51832e-05	1.10816e-05	1.05276e-05	1.69991e-05	7.98896e-06	8.88544e-06	9.43536e-06	1.5828e-05	7.41259e-06	1.71344e-05	1.34514e-05	1.25943e-05
Oxoglutaric acid	Organic acids and derivatives	4.53936e-05	5.05457e-05	5.22066e-05	6.19426e-05	8.04583e-05	4.88501e-05	7.20548e-05	7.12095e-05	6.40156e-05	4.8348e-05	8.29678e-05	5.44766e-05	6.43698e-05	5.13845e-05	8.76012e-05	3.42537e-05	4.38828e-05	9.43731e-05
2-Oxovaleric acid	Organic acids and derivatives	0.000129573	3.10325e-05	2.96076e-05	3.04758e-05	8.19715e-05	3.23235e-05	5.16522e-05	2.78678e-05	5.22092e-05	5.76744e-05	0.000103792	3.63828e-05	3.54016e-05	3.96181e-05	4.40929e-05	3.94689e-05	4.18254e-05	6.97694e-05
Deoxyuridine	Nucleosides, nucleotides, and analogues	1.88037e-05	3.61598e-05	3.82315e-05	5.08808e-05	4.1206e-05	3.52348e-05	4.6128e-05	7.0587e-05	2.70634e-05	5.77346e-05	3.53098e-05	3.06862e-05	2.53331e-05	5.72806e-05	5.09963e-05	3.29571e-05	2.70633e-05	3.17322e-05
Argininosuccinic acid	Organic acids and derivatives	9.5977e-06	1.66017e-06	2.87872e-06	1.73664e-06	2.73661e-06	2.75761e-06	3.35464e-06	4.17348e-06	1.04176e-05	3.29603e-06	3.25084e-06	3.04882e-06	2.2537e-06	4.59683e-06	6.13404e-06	3.82313e-06	8.87675e-06	2.95058e-06
Cytidine monophosphate	Nucleosides, nucleotides, and analogues	3.65098e-06	7.10908e-06	8.69733e-06	1.31599e-05	1.04383e-05	1.24386e-05	6.63449e-06	6.39429e-06	3.91339e-06	1.46804e-05	1.31223e-05	8.0824e-06	4.95994e-06	8.69667e-06	8.31021e-06	4.02415e-06	6.49482e-06	9.69468e-06
PE(16:0/18:2(9Z,12Z))	Lipids and lipid-like molecules	5.57608e-05	6.91542e-05	6.48077e-05	7.34018e-05	7.01081e-05	4.55798e-05	5.55885e-05	3.92592e-05	3.23572e-05	6.73101e-05	6.08234e-05	7.26013e-05	9.4827e-05	5.51356e-05	4.91797e-05	5.28936e-05	3.593e-05	4.93909e-05
3-Hydroxybutyric acid	Organic acids and derivatives	0.000937509	0.000670563	0.000242272	0.000182973	0.000620385	0.00053022	0.000963877	0.000444432	0.000411215	0.000720796	0.00107924	0.00144676	0.00245333	0.000484493	0.000442642	0.000394209	0.000334915	0.000711834
Oxidized glutathione	Organic acids and derivatives	4.09343e-06	1.48281e-05	7.79892e-06	1.34995e-05	1.4763e-05	1.1334e-05	1.58237e-05	1.51303e-05	7.4046e-06	1.2368e-05	1.6536e-05	1.25813e-05	6.46993e-06	8.94457e-06	1.26297e-05	4.24946e-06	8.26933e-06	1.1066e-05
L-Lysine	Organic acids and derivatives	9.09753e-05	0.000135968	0.000120555	8.36818e-05	8.65374e-05	0.000105074	9.76894e-05	0.00010375	0.000116746	0.000118693	0.00013066	0.000124064	0.000113262	0.000107716	0.000169883	0.000107436	0.000124964	8.50963e-05
LysoPE(18:1(9Z)/0:0)	Lipids and lipid-like molecules	0.000290616	5.2272e-05	7.0314e-05	3.02113e-05	7.31336e-05	5.00667e-05	3.86589e-05	0.000121511	0.000276518	5.31957e-05	4.81748e-05	0.000110519	3.97273e-05	7.7919e-05	0.000205567	0.000171034	0.000333206	0.000123259
Pyrrole-2-carboxylic acid	Organoheterocyclic compounds	0.00031671	0.000221231	0.00026168	0.000394206	0.000427441	0.000377179	0.000260743	0.000316087	0.000283657	0.000311564	0.00034345	0.000431008	0.000360695	0.000406498	0.00031276	0.000253646	0.0001969	0.000357344
3-(3,4-Dihydroxy-5-methoxy)-2-propenoic acid	Phenylpropanoids and polyketides	2.78268e-05	1.78691e-05	1.25764e-05	3.69411e-05	5.89593e-05	2.76531e-05	1.9037e-05	2.16953e-05	4.30322e-06	2.34784e-05	1.84322e-05	1.89269e-05	2.57991e-05	2.26379e-05	1.7274e-05	1.90636e-05	4.17504e-06	5.8793e-05
dGTP	Nucleosides, nucleotides, and analogues	3.51225e-08	1.44295e-07	4.55376e-07	7.93319e-06	8.07126e-07	1.57815e-06	2.02408e-06	5.00278e-07	1.37673e-06	2.7136e-06	2.49774e-06	2.70157e-06	2.78052e-06	3.97211e-06	1.40201e-06	4.59257e-07	1.14514e-07	1.23173e-06
NAD	Nucleosides, nucleotides, and analogues	1.19117e-07	7.29971e-07	6.45406e-07	2.23015e-05	4.29251e-06	2.30278e-06	9.2733e-06	6.80671e-07	3.41086e-06	6.52362e-06	1.34972e-05	6.13672e-06	1.10178e-05	1.19513e-05	9.13157e-06	8.98008e-07	1.82503e-06	1.21677e-05
Uridine diphosphategalactose	Nucleosides, nucleotides, and analogues	7.58577e-06	3.70032e-06	3.74356e-06	1.38335e-05	1.61044e-05	7.95329e-07	3.93329e-06	2.80456e-06	1.73919e-07	1.72813e-06	8.03065e-06	2.41625e-06	3.64808e-06	1.53786e-06	8.07891e-07	1.59049e-06	3.64776e-08	2.31843e-06
Adenosine diphosphate ribose	Nucleosides, nucleotides, and analogues	2.26676e-06	0.000309744	0.000164815	0.000207006	0.000252747	0.00029495	0.000227216	0.00021458	0.000111712	0.000369023	0.000270581	0.000324928	0.000175643	0.000223102	0.000166996	8.98788e-05	5.99757e-05	0.000238296
(Â±)-Tryptophan	Organoheterocyclic compounds	8.5925e-05	5.89458e-05	4.67186e-05	4.34785e-05	6.74035e-05	5.97997e-05	7.87542e-05	6.19823e-05	5.3808e-05	6.16831e-05	5.6445e-05	4.93972e-05	6.00131e-05	4.20717e-05	6.46829e-05	3.6786e-05	6.67034e-05	6.11015e-05
Dephospho-CoA	Nucleosides, nucleotides, and analogues	5.56397e-07	5.03225e-06	3.71316e-06	1.22525e-06	2.03128e-06	1.9819e-06	1.54988e-06	4.39034e-06	1.61416e-06	2.24453e-06	2.72803e-06	5.56588e-06	2.02939e-06	1.94583e-06	4.08017e-06	9.64274e-07	3.98786e-06	2.5033e-06
beta-D-Glucosamine	Organooxygen compounds	3.47328e-05	0.000205216	0.000114579	0.000151188	0.000210566	0.000127577	0.000130366	0.00011991	7.29865e-05	0.000146017	0.000172996	9.59408e-05	0.000120036	8.78078e-05	0.000131236	0.000143503	8.58877e-05	8.90459e-05
Glucoiberin	Organic oxygen compounds	3.1341e-07	4.09951e-06	3.33184e-06	2.84306e-06	4.43991e-06	3.01042e-06	2.26745e-06	1.51077e-06	1.2086e-06	3.6444e-06	2.01086e-06	3.09618e-06	2.47952e-06	3.2138e-06	2.24323e-06	1.56096e-06	1.18427e-06	2.43772e-06
N-Formyl-L-aspartate	Organic acids and derivatives	2.42498e-05	3.53472e-05	3.26781e-05	4.63248e-05	3.7512e-05	1.61135e-05	3.00831e-05	2.59221e-05	2.63254e-05	1.02782e-05	1.72586e-05	1.31636e-05	1.80443e-05	1.39144e-05	2.39792e-05	2.94409e-05	2.53742e-05	3.02616e-05
Glucose 1-phosphate	Organic oxygen compounds	9.25231e-05	6.55236e-05	5.42339e-05	4.58391e-05	7.14023e-05	3.99748e-05	5.88697e-05	3.89e-05	6.16175e-05	2.77619e-05	3.97418e-05	2.82642e-05	4.88985e-05	5.34054e-05	6.03043e-05	7.74096e-05	2.31188e-05	4.97522e-05
Thymine	Organoheterocyclic compounds	1.93153e-05	1.19736e-05	8.51263e-06	1.30082e-05	1.81745e-05	1.11268e-05	1.24846e-05	1.42986e-05	1.40018e-05	7.03222e-06	1.17243e-05	4.01076e-06	2.69224e-05	2.27783e-05	9.29402e-06	3.72226e-06	9.04939e-06	9.43061e-06
2,2-Dimethylsuccinic acid	Lipids and lipid-like molecules	1.84922e-06	1.4934e-05	1.5383e-05	1.08209e-05	7.79044e-05	2.69059e-06	8.95949e-06	6.81072e-06	7.37613e-06	8.28863e-06	2.893e-05	1.66533e-05	1.17796e-05	1.47812e-05	9.50665e-06	9.46308e-06	1.51102e-05	2.10955e-05
Imidazoleacetic acid	Organoheterocyclic compounds	2.17695e-05	3.06478e-05	2.60925e-05	3.84742e-05	3.32235e-05	3.53106e-05	5.56412e-05	3.22628e-05	2.81077e-05	3.10207e-05	3.1716e-05	3.48417e-05	2.64317e-05	2.85144e-05	3.01419e-05	2.25791e-05	3.24437e-05	3.50768e-05
Gluconolactone	Organic oxygen compounds	7.2599e-06	9.7334e-06	7.04365e-05	1.37234e-05	1.86098e-05	2.49749e-05	2.66231e-05	1.26931e-05	0.00042472	2.657e-05	1.26417e-05	4.31813e-05	0.000559651	1.27119e-05	5.56947e-05	1.4361e-05	1.44707e-05	1.82321e-05
2,6-Di-tert-butyl-4-methylphenol	Benzenoids	5.04893e-06	3.28406e-06	5.30163e-06	6.39166e-06	4.00448e-06	5.45801e-06	6.78363e-06	5.29592e-06	3.32644e-06	3.98205e-06	4.07892e-06	6.25068e-06	6.13799e-06	6.82669e-06	2.1434e-06	4.99786e-06	3.9583e-06	3.7329e-06
Nicotinic acid	Organoheterocyclic compounds	3.4391e-05	3.81966e-05	4.14174e-05	3.47175e-05	3.38423e-05	3.94926e-05	3.66822e-05	4.43848e-06	3.4205e-05	3.62213e-05	2.62384e-05	3.82944e-05	3.9207e-05	3.29937e-05	3.25807e-05	3.80003e-05	3.47516e-05	3.46978e-05
Carboxytolbutamide	Benzenoids	1.58725e-06	9.47524e-06	1.07903e-05	3.93359e-06	4.10732e-06	1.24884e-05	7.42139e-07	2.09043e-06	3.57062e-08	1.81041e-06	6.51473e-06	3.85071e-08	3.97194e-08	6.5223e-06	4.64389e-06	1.13791e-05	3.46895e-06	3.60638e-08
Deoxyribose 5-phosphate	Organic oxygen compounds	0.000124653	0.000109744	0.00014726	5.05258e-05	6.86481e-05	0.000200355	8.48604e-05	7.53258e-05	0.00018142	0.000221172	0.000157971	0.000181803	0.000130582	0.00044281	0.000178838	0.000103805	0.000213045	0.000123446
Ginkgoic acid	Benzenoids	1.21163e-05	1.14815e-06	2.79673e-06	6.20814e-07	8.64322e-07	2.85415e-06	5.11009e-06	6.26787e-06	9.0555e-06	2.51123e-06	3.97076e-06	3.76639e-06	3.68799e-06	4.52683e-06	4.65778e-06	9.31451e-06	2.18702e-05	4.47796e-06
Cis-zeatin	Organoheterocyclic compounds	2.15235e-05	3.96299e-05	6.13226e-05	3.87697e-05	2.7923e-05	5.56751e-05	3.61546e-05	5.07014e-05	4.55289e-05	6.97083e-05	7.70113e-05	6.07126e-05	5.92524e-05	6.46282e-05	7.12105e-05	5.97034e-05	4.48675e-05	3.35409e-05
Pseudouridine	Nucleosides, nucleotides, and analogues	2.60312e-05	1.98598e-05	1.26833e-05	1.40916e-05	1.64557e-05	2.77125e-05	1.1601e-05	1.47016e-05	1.12254e-05	2.37128e-05	1.79329e-05	1.38023e-05	1.73951e-05	1.17149e-05	1.90431e-05	1.33295e-05	7.12845e-06	1.4746e-05
Pyridoxal	Organoheterocyclic compounds	0.000120867	3.17027e-05	5.53547e-05	3.43483e-05	4.08214e-05	2.08071e-05	4.21037e-05	8.16528e-05	0.000101138	2.04882e-05	3.74034e-05	3.60286e-05	6.49311e-05	5.59906e-05	5.75082e-05	6.31552e-05	9.86769e-05	5.51272e-05
Hexylresorcinol	Benzenoids	1.05433e-05	6.38954e-06	7.78383e-06	6.94084e-06	1.0813e-05	9.19739e-06	3.03397e-05	9.31778e-06	5.19507e-06	6.78478e-06	9.05299e-06	4.58616e-06	1.0821e-05	9.87527e-06	4.55737e-06	5.01767e-06	1.08724e-05	5.49379e-06
